# Supplementary material for: APOE ε4 genotype-dependent cerebrospinal fluid proteomic signatures in Alzheimer’s disease
Source: Alzheimers Res Ther. 2020 May 27;12:65. doi: 10.1186/s13195-020-00628-z (PMC7254647; doi:10.1186/s13195-020-00628-z)
Supplement: Supplementary file 1 — Additional file 1. Supplementary tables. [file 13195_2020_628_MOESM1_ESM.xlsx]

## Sheet: Supplementary table 1
Supplementary table 1. Comparisons of protein concentrations for APOE e4 carriers with abnormal amyloid according to MMSE category against controls (i.e., APOE non-carriers with normal amyloid and MMSE >27). Proteins were Z transformed according to the mean and SD of the control group. Betas (95%CI) show the difference of the control group minus the test group and are adjusted for age and sex.
					ADNI																EMIF-AD MBD
					MMSE >27				MMSE 27-24				MMSE < 24				Normal amyloid, MMSE > 27				MMSE >27				MMSE 27-24				MMSE < 24				Normal amyloid, MMSE > 27
Protein name	Gene	Single protein, composite, Fragment	Ordering figure	Measured in EMIF-AD MBD	Mean (SD)	Beta (95%CI) versus controls	P-value	P-value FDR corrected	Mean (SD)	Beta (95%CI) versus controls	P-value	P-value FDR corrected	Mean (SD)	Beta (95%CI) versus controls	P-value	P-value FDR corrected	Mean (SD)	Beta (95%CI) versus controls	P-value	P-value FDR corrected	Mean (SD)	Beta (95%CI) versus controls	P-value	P-value FDR corrected	Mean (SD)	Beta (95%CI) versus controls	P-value	P-value FDR corrected	Mean (SD)	Beta (95%CI) versus controls	P-value	P-value FDR corrected	Mean (SD)	Beta (95%CI) versus controls	P-value	P-value FDR corrected	Number of Observations in EMIF-AD MBD
Apolipoprotein E	APOE	LGADMEDVR	1	No	2.64 (0.57)	-2.61 (-2.96, -2.26)	1.39889e-26	3.3993e-24	2.62 (0.65)	-2.62 (-2.92, -2.32)	3.67049e-34	8.9193e-32	2.5 (0.54)	-2.48 (-2.93, -2.04)	8.55678e-18	2.0793e-15	1.78 (2.66)	-1.75 (-2.74, -0.76)	0.00078564	0.190911	NA	NA	NA	NA	NA	NA	NA	NA	NA	NA	NA	NA	NA	NA	NA	NA	0
Nicastrin	NCSTN	composite	2	Yes	0.45 (1.1)	-0.48 (-0.89, -0.07)	0.0226145	0.134032	0.12 (1.01)	-0.13 (-0.48, 0.21)	0.447261	0.692258	-0.23 (0.99)	0.2 (-0.27, 0.66)	0.404242	0.561319	0.16 (1.22)	-0.17 (-0.91, 0.56)	0.638585	0.804537	0.23 (0.55)	-0.4 (-0.9, 0.09)	0.106004	0.985963	-0.21 (0.72)	-0.02 (-0.67, 0.64)	0.962642	0.978753	-0.08 (0.78)	0 (-0.7, 0.69)	0.989427	0.993515	-0.14 (1.14)	-0.18 (-1.38, 1.02)	0.759541	0.918251	24
Tau	MAPT	single	3	Yes	2.02 (2.27)	-2.17 (-2.83, -1.51)	3.4031e-09	4.13477e-07	2.67 (2.52)	-2.7 (-3.38, -2.03)	1.40305e-12	1.7047e-10	2.85 (2.4)	-2.92 (-3.66, -2.18)	1.51438e-11	1.83997e-09	0.64 (0.92)	-0.74 (-1.47, -0.01)	0.0464462	0.768706	1.78 (2.3)	-1.51 (-2.22, -0.81)	4.638e-05	0.00375678	3.74 (3.18)	-3.76 (-4.87, -2.64)	1.60882e-09	1.95472e-07	3.58 (2.66)	-3.53 (-4.44, -2.62)	4.8695e-11	5.91644e-09	0.07 (0.84)	-0.18 (-0.84, 0.47)	0.5784	0.873725	55
Neurogranin	NRGN	single (ELISA)	4	Yes	1.04 (1.36)	-1.14 (-1.61, -0.67)	4.90764e-06	0.000397519	1.38 (1.61)	-1.39 (-1.86, -0.92)	5.00777e-08	4.05629e-06	1.47 (1.9)	-1.46 (-2.11, -0.81)	2.59665e-05	0.00210329	0.61 (1.11)	-0.67 (-1.44, 0.11)	0.0904584	0.768706	0.33 (1.24)	-0.28 (-0.77, 0.22)	0.268658	0.985963	0.56 (1.4)	-0.64 (-1.22, -0.06)	0.0311323	0.302606	0.31 (0.86)	-0.32 (-0.79, 0.15)	0.180056	0.462756	0.1 (0.76)	-0.31 (-1.03, 0.42)	0.398534	0.873725	46
Fatty acid-binding protein, heart	FABP3	single	5	Yes	0.56 (0.93)	-0.5 (-0.87, -0.14)	0.00700283	0.103538	0.75 (0.89)	-0.77 (-1.08, -0.46)	3.68379e-06	0.000179032	0.8 (0.74)	-0.78 (-1.19, -0.37)	0.000317496	0.0110217	0.34 (0.76)	-0.45 (-1.08, 0.19)	0.163155	0.768706	0.19 (0.96)	-0.08 (-0.47, 0.32)	0.707654	0.985963	0.74 (0.75)	-0.63 (-1.04, -0.22)	0.00284242	0.0627916	0.68 (0.83)	-0.62 (-1.07, -0.18)	0.00700283	0.154699	-0.19 (0.62)	0 (-0.63, 0.64)	0.99017	0.996942	53
Visinin-like protein 1	VSNL1	single (ELISA)	6	No	0.9 (1.32)	-0.94 (-1.53, -0.35)	0.0023332	0.0629963	1.06 (1.32)	-0.99 (-1.56, -0.42)	0.000980181	0.0396973	1.4 (2.08)	-1.35 (-2.48, -0.22)	0.0200287	0.0961459	0.26 (0.9)	-0.42 (-1.89, 1.06)	0.570486	0.804537	NA	NA	NA	NA	NA	NA	NA	NA	NA	NA	NA	NA	NA	NA	NA	NA	0
Chitinase-3-like protein 1	CHI3L1	composite	7	Yes	0.45 (0.96)	-0.44 (-0.8, -0.07)	0.0194641	0.123323	0.34 (1.01)	-0.38 (-0.72, -0.05)	0.0262147	0.303341	0.56 (0.86)	-0.63 (-1.05, -0.2)	0.00411276	0.0420495	0.08 (0.82)	-0.26 (-0.95, 0.44)	0.464029	0.804537	0.48 (0.92)	-0.41 (-0.8, -0.02)	0.0390128	0.790009	0.75 (0.94)	-0.54 (-0.96, -0.13)	0.0111936	0.136271	0.64 (0.83)	-0.57 (-1, -0.15)	0.00918635	0.186024	-0.06 (0.72)	-0.12 (-0.77, 0.53)	0.718826	0.886674	55
Neurofilament light	NEFL	single	8	Yes	0.02 (0.35)	0.03 (-0.3, 0.35)	0.8803	0.967713	0.15 (0.5)	-0.17 (-0.44, 0.11)	0.225184	0.55716	0.26 (0.64)	-0.24 (-0.69, 0.21)	0.285075	0.454018	-0.28 (0.17)	0.23 (-0.49, 0.95)	0.529656	0.804537	0.92 (2.02)	-0.56 (-1.13, 0)	0.0509006	0.88349	5.17 (16.81)	-2.04 (-7.4, 3.32)	0.452718	0.790616	1.78 (1.98)	-1.67 (-2.35, -1)	4.89193e-06	0.000396247	0.21 (1.3)	-0.25 (-0.9, 0.41)	0.457488	0.873725	55
Osteopontin	SPP1	composite	9	Yes	0.67 (1)	-0.71 (-1.07, -0.35)	0.000173381	0.00842633	0.53 (1.03)	-0.55 (-0.88, -0.22)	0.00130659	0.0453573	0.5 (0.97)	-0.55 (-0.97, -0.13)	0.0104868	0.0654505	0.63 (1.06)	-0.72 (-1.35, -0.09)	0.0257035	0.768706	0.48 (1.05)	-0.43 (-0.86, -0.01)	0.0456709	0.853694	0.98 (0.73)	-0.98 (-1.36, -0.6)	1.3043e-06	8.75589e-05	0.47 (1.07)	-0.42 (-0.89, 0.05)	0.080533	0.461448	-0.12 (0.84)	-0.03 (-0.69, 0.63)	0.924951	0.977231	55
Fibroblast growth factor 4	FGF4	single	10	No	0.83 (0.64)	-0.86 (-1.22, -0.5)	7.85763e-06	0.000477351	0.86 (0.86)	-0.84 (-1.17, -0.51)	1.4413e-06	8.75589e-05	0.96 (0.98)	-0.92 (-1.4, -0.44)	0.000292049	0.0110217	0.74 (0.92)	-0.69 (-1.45, 0.08)	0.0764216	0.768706	NA	NA	NA	NA	NA	NA	NA	NA	NA	NA	NA	NA	NA	NA	NA	NA	0
Hepatocyte growth factor	HGF	single	11	No	0.46 (1.18)	-0.47 (-0.92, -0.03)	0.0382398	0.193589	0.41 (1.2)	-0.42 (-0.82, -0.02)	0.0388992	0.410978	0.53 (1.04)	-0.56 (-1.06, -0.05)	0.0322545	0.1215	0.37 (1.45)	-0.35 (-1.16, 0.46)	0.395626	0.804537	NA	NA	NA	NA	NA	NA	NA	NA	NA	NA	NA	NA	NA	NA	NA	NA	0
Gamma-enolase	ENO2	GNPTVEVDLYTAK	12	Yes	0.57 (0.84)	-0.57 (-0.96, -0.17)	0.00504283	0.103538	0.4 (0.89)	-0.41 (-0.75, -0.07)	0.0196175	0.260844	0.31 (0.69)	-0.29 (-0.75, 0.18)	0.223572	0.390849	0.64 (1.08)	-0.66 (-1.44, 0.12)	0.0950289	0.768706	0.32 (0.99)	-0.3 (-0.73, 0.12)	0.160066	0.985963	0.67 (0.71)	-0.79 (-1.16, -0.42)	5.66033e-05	0.00171933	0.39 (0.95)	-0.39 (-0.86, 0.08)	0.099716	0.461448	0.07 (1)	-0.3 (-0.97, 0.37)	0.377772	0.873725	51
Fructose-bisphosphate aldolase A	ALDOA	composite	13	Yes	0.51 (0.93)	-0.54 (-0.94, -0.15)	0.00732303	0.103538	0.47 (1.07)	-0.5 (-0.86, -0.13)	0.00810064	0.15142	0.29 (0.83)	-0.31 (-0.79, 0.16)	0.189796	0.350798	0.46 (0.8)	-0.52 (-1.26, 0.22)	0.162582	0.768706	0.24 (1.02)	-0.17 (-0.58, 0.24)	0.405046	0.985963	0.78 (0.7)	-0.79 (-1.15, -0.42)	4.47957e-05	0.00155505	0.39 (0.95)	-0.33 (-0.78, 0.11)	0.13605	0.461448	-0.09 (0.62)	-0.17 (-0.79, 0.45)	0.583272	0.873725	55
Pyruvate kinase isozymes M1 M2	PKM	LDIDSPPITAR	14	Yes	0.48 (0.97)	-0.49 (-0.89, -0.08)	0.0186874	0.123323	0.34 (1.1)	-0.37 (-0.74, 0)	0.0517356	0.445953	0.13 (0.88)	-0.14 (-0.62, 0.34)	0.566492	0.702335	0.34 (0.83)	-0.43 (-1.18, 0.32)	0.255976	0.771034	0.34 (0.94)	-0.29 (-0.68, 0.11)	0.153089	0.985963	0.89 (0.67)	-0.87 (-1.24, -0.51)	7.68385e-06	0.000373435	0.49 (0.84)	-0.46 (-0.89, -0.03)	0.0375623	0.396572	-0.28 (0.91)	0.03 (-0.62, 0.69)	0.92148	0.977231	55
Aspartate aminotransferase, mitochondrial	GOT2	FVTVQTISGTGALR	15	Yes	0.42 (0.96)	-0.46 (-0.86, -0.05)	0.029268	0.154612	0.24 (1.05)	-0.25 (-0.61, 0.12)	0.185437	0.55716	0.07 (0.87)	-0.04 (-0.52, 0.44)	0.869104	0.922237	0.74 (1.07)	-0.7 (-1.48, 0.08)	0.076487	0.768706	0 (0.74)	-0.02 (-0.38, 0.33)	0.895906	0.985963	0.4 (0.65)	-0.46 (-0.81, -0.11)	0.0112157	0.136271	0.15 (0.96)	-0.15 (-0.6, 0.29)	0.499195	0.71302	-0.51 (0.6)	0.29 (-0.33, 0.91)	0.354987	0.873725	55
Aspartate aminotransferase, cytoplasmic	GOT1	composite	16	Yes	0.48 (0.96)	-0.49 (-0.89, -0.1)	0.0149934	0.113031	0.25 (1.09)	-0.27 (-0.64, 0.09)	0.143864	0.524236	-0.09 (0.84)	0.09 (-0.37, 0.56)	0.695139	0.816033	0.48 (0.93)	-0.53 (-1.26, 0.21)	0.156575	0.768706	0.19 (0.87)	-0.18 (-0.56, 0.21)	0.358066	0.985963	0.54 (0.65)	-0.59 (-0.94, -0.23)	0.0016222	0.0394194	0.12 (0.86)	-0.09 (-0.52, 0.33)	0.666456	0.834788	-0.04 (0.76)	-0.22 (-0.85, 0.41)	0.48061	0.873725	55
Agouti related protein	AGRP	single	17	No	0.52 (1)	-0.55 (-0.96, -0.14)	0.00985034	0.109469	0.51 (1.11)	-0.52 (-0.89, -0.14)	0.00782859	0.15142	0.08 (1.12)	-0.1 (-0.61, 0.4)	0.683127	0.809755	0.72 (1.29)	-0.75 (-1.55, 0.04)	0.0617642	0.768706	NA	NA	NA	NA	NA	NA	NA	NA	NA	NA	NA	NA	NA	NA	NA	NA	0
S100 calcium binding protein B	S100B	single	18	Yes	0.26 (0.96)	-0.25 (-0.65, 0.15)	0.220902	0.620697	0.44 (1.14)	-0.45 (-0.84, -0.07)	0.0214686	0.260844	0.37 (0.86)	-0.4 (-0.88, 0.07)	0.0945266	0.252417	0.4 (0.83)	-0.44 (-1.19, 0.32)	0.255278	0.771034	0.53 (1.34)	-0.67 (-1.61, 0.26)	0.152621	0.985963	0.23 (1.02)	-0.25 (-1.02, 0.51)	0.508379	0.790616	-0.54 (1)	0.36 (-0.43, 1.15)	0.352962	0.602142	-0.25 (1.23)	0.31 (-0.84, 1.45)	0.582673	0.873725	24
Apolipoprotein B-100	APOB	IAELSATAQEIIK	19	Yes	0.27 (0.58)	-0.25 (-0.6, 0.1)	0.164103	0.539576	0.3 (0.47)	-0.31 (-0.58, -0.03)	0.0308626	0.340892	0.42 (0.26)	-0.46 (-0.88, -0.03)	0.037225	0.131097	0.41 (0.38)	-0.49 (-1.22, 0.23)	0.180681	0.768706	0.07 (1.25)	-0.01 (-0.62, 0.6)	0.961618	0.985963	0.12 (1.08)	-0.25 (-0.86, 0.36)	0.422282	0.790616	0.1 (0.78)	-0.05 (-0.63, 0.53)	0.869716	0.947718	0.4 (1.29)	-0.57 (-1.5, 0.37)	0.225418	0.873725	34
Apolipoprotein D	APOD	VLNQELR	20	Yes	0.24 (0.79)	-0.24 (-0.63, 0.14)	0.207205	0.620697	0.23 (0.79)	-0.24 (-0.57, 0.08)	0.133138	0.513532	0.09 (1.01)	-0.11 (-0.61, 0.39)	0.662862	0.789586	0.13 (0.8)	-0.2 (-0.95, 0.55)	0.59961	0.804537	0.24 (1.12)	-0.18 (-0.63, 0.26)	0.414024	0.985963	0.26 (0.87)	-0.09 (-0.5, 0.32)	0.662922	0.897299	0.24 (1.05)	-0.19 (-0.68, 0.31)	0.457754	0.686631	0.04 (1.31)	0.07 (-0.68, 0.82)	0.852722	0.952592	51
Apolipoprotein aL	LPA	single	21	No	0.19 (1.23)	-0.22 (-0.67, 0.23)	0.326074	0.703829	-0.06 (1.09)	0.02 (-0.34, 0.37)	0.930628	0.946204	0.58 (1.23)	-0.62 (-1.15, -0.09)	0.0221449	0.099652	-0.23 (1.52)	0.17 (-0.62, 0.96)	0.667212	0.804537	NA	NA	NA	NA	NA	NA	NA	NA	NA	NA	NA	NA	NA	NA	NA	NA	0
Endothelin1ET1pgmL	EDN1		22	No	0.14 (1.34)	-0.07 (-0.55, 0.4)	0.756936	0.960843	0.22 (1.05)	-0.21 (-0.57, 0.16)	0.267246	0.559834	-0.03 (1.28)	0.07 (-0.47, 0.61)	0.794785	0.889501	0.38 (1.05)	-0.37 (-1.15, 0.4)	0.338421	0.804537	NA	NA	NA	NA	NA	NA	NA	NA	NA	NA	NA	NA	NA	NA	NA	NA	0
Glial fibrillary acidic protein	GFAP	ALAAELNQLR	23	No	0.29 (1.31)	-0.26 (-0.68, 0.16)	0.222225	0.620697	0.31 (1.28)	-0.36 (-0.74, 0.03)	0.0672514	0.45644	0.39 (1.14)	-0.48 (-0.94, -0.03)	0.0379771	0.131835	-0.13 (0.9)	-0.07 (-0.77, 0.63)	0.843489	0.931672	NA	NA	NA	NA	NA	NA	NA	NA	NA	NA	NA	NA	NA	NA	NA	NA	0
Sortilin	SORT1	single	24	Yes	0.28 (1.05)	-0.31 (-0.73, 0.1)	0.139299	0.492202	0.22 (1.29)	-0.24 (-0.65, 0.17)	0.253221	0.55716	0.29 (1.11)	-0.36 (-0.87, 0.15)	0.162661	0.333399	0.5 (1.12)	-0.52 (-1.3, 0.26)	0.186791	0.768706	0.09 (0.94)	-0.16 (-0.56, 0.24)	0.434078	0.985963	0.22 (0.74)	-0.27 (-0.64, 0.1)	0.155871	0.701419	0.02 (1.02)	-0.03 (-0.49, 0.43)	0.892035	0.959135	0.01 (1.18)	-0.2 (-0.88, 0.48)	0.554061	0.873725	55
Resistin	RETN	single	25	No	0.05 (1.31)	0.04 (-0.42, 0.5)	0.84932	0.967713	0.42 (1.56)	-0.44 (-0.91, 0.03)	0.0676208	0.45644	0.29 (1.42)	-0.26 (-0.82, 0.31)	0.368326	0.543577	-0.3 (2.2)	0.34 (-0.54, 1.21)	0.445321	0.804537	NA	NA	NA	NA	NA	NA	NA	NA	NA	NA	NA	NA	NA	NA	NA	NA	0
N terminal pro hormone of brain natriuretic peptide	NPPB	single	26	No	0.07 (0.94)	-0.11 (-0.51, 0.28)	0.569895	0.884693	0.24 (1.06)	-0.28 (-0.63, 0.08)	0.127588	0.500062	0.24 (1.05)	-0.34 (-0.83, 0.16)	0.178701	0.341924	0.12 (1.06)	-0.17 (-0.94, 0.6)	0.661909	0.804537	NA	NA	NA	NA	NA	NA	NA	NA	NA	NA	NA	NA	NA	NA	NA	NA	0
Macrophage migration inhibitory factor	MIF	single	27	Yes	0.27 (1.07)	-0.23 (-0.65, 0.19)	0.274167	0.686831	0.33 (1)	-0.35 (-0.7, 0.01)	0.0549434	0.445953	0.35 (0.85)	-0.34 (-0.82, 0.13)	0.156435	0.329826	-0.33 (0.61)	0.25 (-0.49, 0.98)	0.505737	0.804537	0.37 (0.88)	-0.3 (-0.71, 0.11)	0.145988	0.985963	0.87 (0.63)	-0.88 (-1.26, -0.49)	2.31045e-05	0.000935732	0.64 (0.84)	-0.58 (-1.06, -0.11)	0.01703	0.281302	-0.42 (1.45)	0.22 (-0.6, 1.04)	0.595718	0.873725	47
Leptin	LEP	single	28	No	-0.76 (0.99)	0.58 (0.24, 0.93)	0.00120771	0.0366843	-0.16 (1.09)	0.18 (-0.14, 0.49)	0.27855	0.559878	0.19 (0.79)	-0.25 (-0.69, 0.18)	0.251919	0.422181	0.07 (1.18)	0.04 (-0.64, 0.73)	0.902787	0.962181	NA	NA	NA	NA	NA	NA	NA	NA	NA	NA	NA	NA	NA	NA	NA	NA	0
Thyroxine binding globulin	SERPINA7	single	29	Yes	-0.39 (0.9)	0.5 (0.12, 0.88)	0.0112753	0.113031	-0.14 (0.98)	0.15 (-0.19, 0.5)	0.388185	0.653846	0.19 (1.13)	-0.06 (-0.56, 0.43)	0.803923	0.891497	-0.19 (0.76)	0.33 (-0.39, 1.04)	0.363204	0.804537	0.08 (1.15)	-0.18 (-0.62, 0.27)	0.428126	0.985963	-0.06 (0.94)	0.13 (-0.3, 0.57)	0.544421	0.811621	0.34 (1.01)	-0.39 (-0.86, 0.08)	0.100065	0.461448	0.15 (0.88)	-0.05 (-0.73, 0.63)	0.883043	0.957943	55
Inter-alpha-trypsin inhibitor heavy chain H1	ITIH1	composite	30	Yes	-0.36 (0.79)	0.46 (0.1, 0.82)	0.0137616	0.113031	-0.22 (0.79)	0.22 (-0.09, 0.52)	0.163179	0.55716	0 (0.87)	0.12 (-0.33, 0.57)	0.604289	0.744047	0.11 (1)	-0.05 (-0.79, 0.68)	0.882413	0.948789	0.02 (0.82)	-0.01 (-0.39, 0.37)	0.960042	0.985963	-0.16 (0.74)	0.14 (-0.24, 0.52)	0.468078	0.790616	0.18 (0.79)	-0.2 (-0.63, 0.24)	0.369862	0.602142	0.08 (0.82)	0 (-0.67, 0.67)	0.996942	0.996942	55
Protein AMBP	AMBP	composite	31	Yes	-0.27 (0.85)	0.4 (0.05, 0.75)	0.0237927	0.137658	-0.19 (0.88)	0.18 (-0.11, 0.46)	0.226133	0.55716	-0.2 (1.09)	0.29 (-0.15, 0.74)	0.195266	0.355221	-0.25 (0.8)	0.23 (-0.43, 0.9)	0.489268	0.804537	0.1 (0.71)	-0.02 (-0.35, 0.31)	0.909909	0.985963	-0.06 (0.75)	0.2 (-0.16, 0.55)	0.27537	0.743929	0.24 (0.84)	-0.18 (-0.6, 0.24)	0.387778	0.613546	0.34 (0.73)	-0.19 (-0.81, 0.43)	0.548937	0.873725	55
Cystatin-C	CST3	composite	32	Yes	-0.1 (0.23)	0.11 (0, 0.22)	0.0460182	0.223648	0.02 (0.23)	-0.02 (-0.12, 0.07)	0.622004	0.79972	-0.06 (0.3)	0.06 (-0.08, 0.2)	0.371332	0.543577	-0.1 (0.16)	0.1 (-0.11, 0.31)	0.334004	0.804537	-0.13 (0.9)	0.16 (-0.24, 0.55)	0.427914	0.985963	0.16 (0.66)	-0.13 (-0.5, 0.24)	0.493517	0.790616	-0.27 (0.81)	0.32 (-0.11, 0.74)	0.141963	0.461448	-0.06 (0.56)	-0.13 (-0.76, 0.5)	0.679374	0.878127	55
Metalloproteinase inhibitor 1	TIMP1	composite	33	Yes	-0.29 (0.85)	0.39 (0.05, 0.73)	0.0254056	0.143571	-0.12 (0.89)	0.1 (-0.19, 0.39)	0.509008	0.707206	-0.16 (1.27)	0.19 (-0.27, 0.66)	0.408667	0.562457	0.02 (0.59)	-0.07 (-0.7, 0.57)	0.831885	0.930956	0.01 (1.08)	0.04 (-0.4, 0.47)	0.859052	0.985963	0.26 (0.89)	-0.14 (-0.56, 0.28)	0.501811	0.790616	0.05 (0.88)	0.06 (-0.37, 0.49)	0.790284	0.910137	0.42 (1.23)	-0.63 (-1.34, 0.09)	0.084875	0.873725	55
Leucine-rich alpha-2-glycoprotein	LRG1	composite	34	Yes	-0.37 (1.01)	0.45 (0.04, 0.86)	0.030835	0.159423	-0.16 (0.98)	0.15 (-0.19, 0.5)	0.388263	0.653846	0 (1.24)	0.07 (-0.45, 0.59)	0.776225	0.877315	-0.43 (1.12)	0.46 (-0.31, 1.23)	0.236197	0.771034	0.04 (1.06)	-0.02 (-0.45, 0.41)	0.928947	0.985963	-0.2 (1.08)	0.37 (-0.09, 0.83)	0.111876	0.63454	0.29 (1.36)	-0.25 (-0.8, 0.3)	0.373497	0.602142	-0.26 (1.47)	0.31 (-0.48, 1.09)	0.435754	0.873725	55
Serum amyloid P component	APCS	single	35	Yes	-0.26 (0.94)	0.44 (0.1, 0.79)	0.0129958	0.113031	-0.08 (0.9)	0.09 (-0.21, 0.38)	0.560097	0.759781	-0.01 (0.95)	0.18 (-0.23, 0.58)	0.388626	0.55255	0.01 (1)	-0.01 (-0.67, 0.66)	0.986439	0.997242	-0.03 (0.88)	0.04 (-0.33, 0.42)	0.826521	0.985963	-0.45 (0.85)	0.34 (-0.02, 0.7)	0.0672972	0.497935	-0.09 (0.81)	0.09 (-0.31, 0.48)	0.66437	0.834788	0.35 (0.83)	-0.11 (-0.74, 0.52)	0.733224	0.890867	55
Apolipoprotein H	APOH	single	36	Yes	-0.28 (0.87)	0.42 (0.05, 0.78)	0.0269955	0.145776	-0.2 (0.94)	0.2 (-0.12, 0.51)	0.221125	0.55716	-0.04 (1.11)	0.17 (-0.32, 0.65)	0.497249	0.653143	0.02 (0.88)	0.07 (-0.63, 0.77)	0.842704	0.931672	-0.03 (0.83)	0.04 (-0.33, 0.42)	0.816177	0.985963	-0.06 (0.69)	0.15 (-0.21, 0.51)	0.416291	0.790616	-0.04 (1)	0.09 (-0.37, 0.54)	0.700041	0.859141	0.31 (0.95)	-0.09 (-0.76, 0.57)	0.774836	0.922487	55
N-acetylmuramoyl-L-alanine amidase	PGLYRP2	composite	37	Yes	-0.27 (0.73)	0.41 (0.07, 0.75)	0.0186927	0.123323	-0.06 (0.68)	0.07 (-0.2, 0.34)	0.621979	0.79972	-0.16 (0.81)	0.3 (-0.12, 0.72)	0.157448	0.329826	-0.17 (0.59)	0.22 (-0.43, 0.88)	0.497346	0.804537	0.06 (0.99)	-0.03 (-0.44, 0.37)	0.864458	0.985963	-0.01 (0.96)	0.09 (-0.33, 0.51)	0.662006	0.897299	0.35 (1.03)	-0.37 (-0.83, 0.1)	0.118833	0.461448	0.61 (0.7)	-0.41 (-1.04, 0.22)	0.199524	0.873725	55
Myoglobin	MB	single	38	Yes	-0.4 (0.68)	0.5 (0.14, 0.85)	0.0066268	0.103538	-0.24 (1.03)	0.24 (-0.11, 0.59)	0.17222	0.55716	-0.21 (1.16)	0.32 (-0.19, 0.82)	0.213201	0.375418	-0.55 (0.59)	0.63 (-0.07, 1.34)	0.0783168	0.768706	-0.04 (0.8)	-0.02 (-0.53, 0.49)	0.938466	0.985963	-0.33 (0.34)	0.34 (-0.07, 0.75)	0.105881	0.63454	-0.4 (0.4)	0.39 (-0.09, 0.86)	0.108094	0.461448	0.2 (0.7)	-0.24 (-1.57, 1.08)	0.712332	0.886674	33
Complement C3	C3	TGLQEVEVK	39	Yes	-0.45 (0.89)	0.49 (0.09, 0.88)	0.0159997	0.114351	-0.03 (0.97)	0.04 (-0.31, 0.38)	0.836701	0.941457	-0.33 (0.91)	0.35 (-0.14, 0.84)	0.16395	0.333399	-0.35 (0.82)	0.4 (-0.35, 1.15)	0.288359	0.796265	0.57 (2.36)	-0.55 (-1.37, 0.28)	0.19245	0.985963	-0.32 (1.02)	0.45 (-0.02, 0.92)	0.0628791	0.497935	-0.05 (0.45)	0.09 (-0.3, 0.48)	0.641789	0.833982	0.11 (0.72)	-0.12 (-0.79, 0.55)	0.718503	0.886674	51
Factor H	CFH	single	40	Yes	-0.34 (0.76)	0.46 (0.11, 0.81)	0.00991078	0.109469	-0.18 (0.88)	0.17 (-0.14, 0.48)	0.286973	0.559878	0.11 (1.12)	0 (-0.46, 0.45)	0.986224	0.990299	0 (0.71)	0 (-0.7, 0.7)	0.999588	0.999588	-0.01 (1.13)	0.07 (-0.37, 0.52)	0.742477	0.985963	-0.18 (0.69)	0.26 (-0.11, 0.62)	0.169195	0.710635	0.06 (0.73)	0 (-0.41, 0.42)	0.988427	0.993515	0.43 (1.3)	-0.52 (-1.26, 0.23)	0.167446	0.873725	55
C-reactive protein	CRP	composite	41	No	-0.85 (1.35)	0.81 (0.34, 1.28)	0.000920276	0.0319467	-0.55 (1.32)	0.55 (0.13, 0.97)	0.0101612	0.175592	-0.46 (1.72)	0.47 (-0.14, 1.07)	0.131146	0.309403	-0.16 (0.82)	0.16 (-0.57, 0.89)	0.665502	0.804537	NA	NA	NA	NA	NA	NA	NA	NA	NA	NA	NA	NA	NA	NA	NA	NA	0
Interferon gamma induced protein 10	CXCL10	single	42	No	-0.48 (1.05)	0.56 (0.15, 0.97)	0.00766947	0.103538	-0.48 (1.01)	0.47 (0.11, 0.82)	0.010839	0.175592	-0.28 (1.16)	0.33 (-0.17, 0.82)	0.190557	0.350798	-0.9 (0.91)	0.84 (0.1, 1.58)	0.0261614	0.768706	NA	NA	NA	NA	NA	NA	NA	NA	NA	NA	NA	NA	NA	NA	NA	NA	0
Apolipoprotein E	APOE	CLAVYQAGAR	43	No	-0.56 (0.87)	0.53 (0.14, 0.93)	0.00892156	0.109469	-0.53 (0.97)	0.53 (0.17, 0.88)	0.00376372	0.102394	-0.48 (1)	0.39 (-0.1, 0.88)	0.117203	0.287832	-0.07 (0.32)	0.08 (-0.65, 0.81)	0.826104	0.929367	NA	NA	NA	NA	NA	NA	NA	NA	NA	NA	NA	NA	NA	NA	NA	NA	0
Interleukin 3	IL3	single	44	No	-0.44 (0.88)	0.5 (0.11, 0.89)	0.012709	0.113031	-0.51 (1)	0.5 (0.14, 0.85)	0.00618498	0.136632	-0.53 (0.74)	0.57 (0.12, 1.03)	0.0145865	0.0801966	-0.28 (0.74)	0.26 (-0.47, 1)	0.478022	0.804537	NA	NA	NA	NA	NA	NA	NA	NA	NA	NA	NA	NA	NA	NA	NA	NA	0
Apolipoprotein AI	APOA1	single	45	Yes	-0.42 (0.99)	0.48 (0.07, 0.89)	0.0215664	0.131016	-0.33 (0.83)	0.33 (0, 0.65)	0.0479289	0.445953	-0.45 (0.97)	0.54 (0.06, 1.02)	0.0292119	0.116369	-0.41 (1.08)	0.5 (-0.25, 1.26)	0.189804	0.768706	0.18 (0.81)	-0.17 (-0.54, 0.21)	0.383693	0.985963	-0.14 (0.83)	0.19 (-0.21, 0.59)	0.343585	0.790616	0.21 (0.95)	-0.23 (-0.68, 0.23)	0.324881	0.592556	0.34 (0.61)	-0.2 (-0.83, 0.43)	0.528619	0.873725	55
Alpha-2-HS-glycoprotein	AHSG	composite	46	Yes	-0.38 (0.89)	0.51 (0.14, 0.88)	0.00707215	0.103538	-0.2 (0.78)	0.2 (-0.08, 0.49)	0.163039	0.55716	-0.25 (0.79)	0.4 (-0.02, 0.82)	0.0610245	0.180841	-0.15 (1.01)	0.19 (-0.52, 0.9)	0.603308	0.804537	0.14 (0.93)	-0.16 (-0.55, 0.23)	0.425489	0.985963	-0.25 (0.95)	0.25 (-0.17, 0.66)	0.23617	0.743929	0.12 (1.11)	-0.18 (-0.66, 0.3)	0.461876	0.688563	0.37 (0.89)	-0.2 (-0.86, 0.47)	0.551922	0.873725	55
Ceruloplasmin	CP	composite	47	Yes	-0.43 (0.9)	0.49 (0.1, 0.88)	0.0143584	0.113031	-0.18 (0.83)	0.17 (-0.15, 0.49)	0.292089	0.559878	-0.19 (1.09)	0.26 (-0.23, 0.76)	0.293652	0.46336	-0.15 (0.93)	0.19 (-0.56, 0.94)	0.617464	0.804537	0.15 (1)	-0.18 (-0.6, 0.24)	0.403947	0.985963	-0.15 (0.82)	0.24 (-0.16, 0.65)	0.23789	0.743929	0.35 (1.07)	-0.37 (-0.86, 0.11)	0.131006	0.461448	0.19 (1.07)	-0.2 (-0.92, 0.51)	0.567395	0.873725	55
Alpha-1B-glycoprotein	A1BG	composite	48	Yes	-0.51 (0.93)	0.57 (0.17, 0.97)	0.00558109	0.103538	-0.19 (0.82)	0.19 (-0.13, 0.51)	0.239342	0.55716	-0.12 (0.96)	0.21 (-0.27, 0.69)	0.387258	0.55255	-0.11 (1.09)	0.17 (-0.59, 0.93)	0.660705	0.804537	0.09 (0.87)	-0.09 (-0.48, 0.3)	0.660078	0.985963	-0.2 (0.92)	0.35 (-0.08, 0.77)	0.10965	0.63454	0.22 (1.1)	-0.24 (-0.73, 0.26)	0.342309	0.598754	0.28 (0.93)	-0.15 (-0.83, 0.53)	0.664065	0.876922	55
Afamin	AFM	composite	49	Yes	-0.55 (0.7)	0.66 (0.32, 1.01)	0.000242327	0.00981425	-0.27 (0.83)	0.28 (-0.03, 0.59)	0.0717614	0.468779	-0.2 (0.86)	0.34 (-0.1, 0.77)	0.127822	0.304517	-0.05 (0.69)	0.18 (-0.49, 0.85)	0.591001	0.804537	-0.06 (0.99)	0.05 (-0.37, 0.46)	0.824504	0.985963	-0.16 (0.83)	0.17 (-0.23, 0.57)	0.393283	0.790616	0.07 (0.84)	-0.1 (-0.53, 0.32)	0.626327	0.822688	0.35 (0.72)	-0.15 (-0.79, 0.48)	0.633506	0.87473	55
Complement C2	C2	composite	50	Yes	-0.34 (0.89)	0.45 (0.07, 0.82)	0.0197926	0.123323	-0.26 (0.92)	0.25 (-0.07, 0.57)	0.121281	0.493698	-0.22 (1)	0.33 (-0.12, 0.79)	0.149061	0.329826	-0.09 (0.77)	0.15 (-0.55, 0.85)	0.67074	0.804537	-0.03 (1.08)	0.01 (-0.43, 0.45)	0.959865	0.985963	-0.24 (0.82)	0.2 (-0.2, 0.6)	0.332757	0.785048	-0.01 (1.32)	-0.05 (-0.59, 0.49)	0.847449	0.94032	0.43 (1.25)	-0.43 (-1.18, 0.31)	0.249087	0.873725	55
Complement C3	C3	composite	51	Yes	-0.33 (0.84)	0.42 (0.08, 0.76)	0.0153499	0.113031	-0.23 (0.77)	0.22 (-0.06, 0.49)	0.121901	0.493698	0.01 (0.97)	0.05 (-0.37, 0.47)	0.797989	0.889501	-0.2 (0.88)	0.21 (-0.43, 0.85)	0.506132	0.804537	-0.03 (0.87)	0.03 (-0.36, 0.41)	0.894748	0.985963	-0.34 (0.89)	0.38 (-0.04, 0.8)	0.0723981	0.516821	-0.23 (0.7)	0.25 (-0.17, 0.66)	0.243801	0.502064	0.1 (1.02)	-0.07 (-0.77, 0.64)	0.849936	0.952592	55
Complement C5	C5	composite	52	Yes	-0.28 (0.98)	0.4 (0.01, 0.79)	0.0425737	0.211131	-0.19 (0.87)	0.19 (-0.12, 0.5)	0.236953	0.55716	-0.13 (1.02)	0.26 (-0.2, 0.71)	0.262388	0.429941	0.05 (0.98)	0.01 (-0.72, 0.74)	0.978012	0.997242	0.08 (0.76)	-0.08 (-0.44, 0.29)	0.677824	0.985963	-0.14 (0.71)	0.16 (-0.22, 0.53)	0.403115	0.790616	0.23 (0.65)	-0.23 (-0.64, 0.17)	0.255942	0.505641	-0.04 (0.94)	0.1 (-0.59, 0.79)	0.768725	0.922487	55
Complement component C6	C6	composite	53	Yes	-0.38 (0.91)	0.47 (0.08, 0.85)	0.0190318	0.123323	-0.16 (0.95)	0.16 (-0.18, 0.49)	0.359213	0.636661	-0.25 (1.19)	0.35 (-0.15, 0.85)	0.171709	0.338512	-0.04 (1.12)	0.08 (-0.67, 0.84)	0.824079	0.929367	0.05 (0.92)	-0.05 (-0.45, 0.35)	0.803542	0.985963	-0.03 (0.7)	0.06 (-0.32, 0.44)	0.760626	0.924161	0.32 (0.69)	-0.33 (-0.75, 0.08)	0.116289	0.461448	-0.06 (0.73)	0.06 (-0.61, 0.73)	0.858595	0.952687	55
Complement factor B	CFB	composite	54	Yes	-0.41 (0.79)	0.51 (0.15, 0.87)	0.00557846	0.103538	-0.22 (0.97)	0.23 (-0.1, 0.56)	0.167096	0.55716	-0.3 (1.17)	0.42 (-0.06, 0.89)	0.085568	0.233629	-0.09 (1.11)	0.19 (-0.53, 0.9)	0.605521	0.804537	-0.02 (0.81)	-0.01 (-0.38, 0.36)	0.953029	0.985963	-0.43 (0.7)	0.39 (0.02, 0.77)	0.0404636	0.364173	-0.14 (0.91)	0.09 (-0.36, 0.54)	0.69646	0.859085	0.14 (0.74)	-0.05 (-0.71, 0.62)	0.890119	0.961328	55
Prothrombin	F2	composite	55	Yes	-0.36 (0.86)	0.48 (0.11, 0.85)	0.0125304	0.113031	-0.16 (0.9)	0.16 (-0.16, 0.49)	0.322053	0.597397	-0.28 (1.08)	0.39 (-0.09, 0.86)	0.112533	0.284849	0.03 (0.76)	0.03 (-0.69, 0.74)	0.943259	0.987982	0.07 (0.87)	-0.12 (-0.5, 0.26)	0.534049	0.985963	-0.02 (0.83)	0.01 (-0.39, 0.42)	0.953983	0.974024	0.18 (0.77)	-0.21 (-0.63, 0.21)	0.324949	0.592556	0.47 (0.88)	-0.35 (-1.03, 0.33)	0.306017	0.873725	55
Plasminogen	PLG	composite	56	Yes	-0.41 (0.83)	0.5 (0.12, 0.87)	0.00968833	0.109469	-0.16 (0.84)	0.17 (-0.14, 0.48)	0.286625	0.559878	-0.28 (0.88)	0.39 (-0.05, 0.84)	0.0842703	0.233629	0.11 (0.75)	-0.03 (-0.73, 0.67)	0.932855	0.981814	0.03 (0.99)	-0.08 (-0.49, 0.33)	0.702627	0.985963	-0.2 (0.78)	0.2 (-0.19, 0.59)	0.322426	0.779311	0.14 (0.99)	-0.21 (-0.66, 0.25)	0.363158	0.602142	0.28 (0.69)	-0.09 (-0.73, 0.55)	0.78227	0.922774	55
Hemopexin	HPX	composite	57	Yes	-0.34 (0.86)	0.46 (0.09, 0.82)	0.0144385	0.113031	-0.1 (0.79)	0.09 (-0.2, 0.39)	0.522258	0.716999	-0.06 (0.88)	0.17 (-0.27, 0.61)	0.453547	0.612288	-0.24 (0.95)	0.25 (-0.47, 0.97)	0.486332	0.804537	-0.03 (1)	0 (-0.41, 0.42)	0.991169	0.99605	-0.18 (0.87)	0.23 (-0.18, 0.63)	0.265911	0.743929	0.19 (1.21)	-0.22 (-0.73, 0.3)	0.406312	0.624075	0.34 (0.76)	-0.21 (-0.87, 0.45)	0.526291	0.873725	55
Kininogen-1	KNG1	composite	58	Yes	-0.44 (0.72)	0.54 (0.18, 0.9)	0.00370494	0.09003	-0.26 (0.78)	0.27 (-0.03, 0.57)	0.0818834	0.468779	-0.23 (0.86)	0.36 (-0.09, 0.8)	0.116744	0.287832	-0.05 (0.68)	0.15 (-0.55, 0.85)	0.675414	0.804537	-0.11 (0.82)	0.13 (-0.25, 0.5)	0.50716	0.985963	-0.41 (0.88)	0.52 (0.11, 0.92)	0.0127367	0.147382	-0.03 (0.89)	0.01 (-0.43, 0.44)	0.969641	0.990011	0.34 (0.62)	-0.15 (-0.77, 0.46)	0.618439	0.873725	55
Vitamin D-binding protein	GC	composite	59	Yes	-0.39 (0.89)	0.49 (0.1, 0.87)	0.0137813	0.113031	-0.18 (0.77)	0.19 (-0.11, 0.49)	0.220973	0.55716	-0.22 (0.87)	0.33 (-0.13, 0.78)	0.153731	0.329826	-0.07 (0.81)	0.16 (-0.56, 0.87)	0.663728	0.804537	0.21 (0.95)	-0.26 (-0.66, 0.13)	0.19263	0.985963	-0.06 (0.89)	0.02 (-0.39, 0.43)	0.923277	0.970569	0.31 (1.16)	-0.38 (-0.87, 0.1)	0.120015	0.461448	0.46 (0.83)	-0.25 (-0.91, 0.4)	0.444422	0.873725	55
Mimecan	OGN	composite	60	Yes	-0.26 (0.82)	0.39 (0.05, 0.73)	0.0263837	0.14571	-0.28 (0.82)	0.28 (0, 0.57)	0.0520529	0.445953	-0.46 (0.84)	0.58 (0.17, 0.98)	0.0055325	0.0495063	-0.22 (0.56)	0.21 (-0.41, 0.83)	0.496991	0.804537	-0.24 (0.96)	0.22 (-0.19, 0.63)	0.293597	0.985963	-0.11 (0.72)	0.13 (-0.25, 0.51)	0.50144	0.790616	-0.28 (0.74)	0.25 (-0.17, 0.67)	0.238022	0.500473	-0.22 (1.02)	0.1 (-0.59, 0.79)	0.774763	0.922487	55
Kallistatin	SERPINA4	composite	61	Yes	-0.35 (0.86)	0.47 (0.1, 0.84)	0.0125447	0.113031	-0.15 (0.78)	0.15 (-0.15, 0.44)	0.331273	0.605259	-0.27 (0.94)	0.39 (-0.05, 0.84)	0.0822757	0.232477	-0.08 (0.75)	0.15 (-0.55, 0.84)	0.674489	0.804537	-0.07 (1.02)	0.07 (-0.33, 0.48)	0.715939	0.985963	-0.07 (1.06)	0.14 (-0.29, 0.58)	0.514063	0.790616	0.25 (1.07)	-0.27 (-0.73, 0.2)	0.252481	0.505641	0.42 (0.81)	-0.23 (-0.86, 0.4)	0.462954	0.873725	55
Monocyte differentiation antigen CD14	CD14	composite	62	Yes	-0.06 (1.24)	0.16 (-0.25, 0.57)	0.44914	0.802507	-0.26 (1.16)	0.23 (-0.13, 0.58)	0.20875	0.55716	-0.53 (0.98)	0.56 (0.13, 1)	0.0114656	0.0679544	-0.09 (0.71)	-0.02 (-0.68, 0.64)	0.951888	0.988499	0.11 (1.04)	0 (-0.41, 0.41)	0.99926	0.99926	0.23 (0.65)	-0.02 (-0.38, 0.34)	0.912817	0.970569	0.03 (0.89)	0.11 (-0.31, 0.54)	0.595971	0.79572	-0.04 (1.06)	-0.14 (-0.83, 0.55)	0.688485	0.880042	55
Clusterin	CLU	composite	63	Yes	0.02 (0.96)	0.01 (-0.36, 0.37)	0.972379	0.976397	-0.04 (1.03)	0.02 (-0.32, 0.35)	0.91704	0.946155	-0.5 (1.15)	0.51 (0.05, 0.96)	0.0291533	0.116369	0.13 (0.62)	-0.2 (-0.86, 0.45)	0.539817	0.804537	-0.08 (1.39)	0.1 (-0.42, 0.61)	0.707773	0.985963	-0.03 (1)	0.13 (-0.32, 0.57)	0.573505	0.837938	-0.35 (1.12)	0.4 (-0.1, 0.89)	0.11735	0.461448	-0.12 (1.3)	0.01 (-0.73, 0.74)	0.981342	0.996942	55
Ferritin	FTL	single	64	No	0.4 (1.2)	-0.39 (-0.83, 0.06)	0.0861053	0.348726	0.36 (1.34)	-0.37 (-0.79, 0.05)	0.0868109	0.468779	0.43 (1.27)	-0.45 (-0.98, 0.08)	0.0972321	0.254058	0.61 (1.05)	-0.65 (-1.42, 0.13)	0.100424	0.768706	NA	NA	NA	NA	NA	NA	NA	NA	NA	NA	NA	NA	NA	NA	NA	NA	0
Biotinidase	BTD	composite	65	Yes	-0.19 (1.13)	0.26 (-0.16, 0.67)	0.226506	0.625464	-0.34 (1)	0.33 (-0.02, 0.67)	0.0672901	0.45644	-0.62 (1.18)	0.65 (0.17, 1.14)	0.00930978	0.0634884	0.13 (0.75)	-0.18 (-0.9, 0.54)	0.621559	0.804537	0.18 (0.75)	-0.26 (-0.61, 0.09)	0.147032	0.985963	0.24 (0.53)	-0.39 (-0.71, -0.07)	0.0175246	0.185151	0.06 (0.55)	-0.1 (-0.46, 0.26)	0.580744	0.779673	0.2 (0.84)	-0.39 (-1.01, 0.22)	0.202304	0.873725	55
EGF-containing fibulin-like extracellular matrix protein 1	EFEMP1	composite	66	Yes	-0.13 (0.86)	0.17 (-0.19, 0.53)	0.349003	0.703829	-0.17 (0.84)	0.14 (-0.16, 0.44)	0.365952	0.636872	-0.34 (0.74)	0.35 (-0.08, 0.78)	0.109969	0.281289	-0.1 (0.65)	-0.01 (-0.69, 0.67)	0.978577	0.997242	0.02 (0.96)	0.03 (-0.38, 0.43)	0.89592	0.985963	0.3 (0.75)	-0.17 (-0.55, 0.21)	0.375217	0.790616	0.07 (0.72)	0.02 (-0.38, 0.43)	0.913223	0.969054	-0.27 (0.6)	0.04 (-0.58, 0.66)	0.898934	0.966419	55
Cochlin	COCH	GVISNSGGPVR	67	Yes	-0.03 (0.79)	0.12 (-0.24, 0.47)	0.524978	0.848014	-0.15 (0.77)	0.13 (-0.18, 0.43)	0.408445	0.6573	-0.14 (0.77)	0.18 (-0.27, 0.63)	0.419959	0.573315	-0.17 (0.67)	0.05 (-0.63, 0.73)	0.879925	0.948789	0 (0.81)	0.04 (-0.34, 0.42)	0.827336	0.985963	0.33 (0.87)	-0.23 (-0.64, 0.19)	0.280365	0.743929	-0.06 (0.71)	0.08 (-0.34, 0.5)	0.716199	0.861582	-0.05 (0.66)	-0.02 (-0.67, 0.64)	0.958978	0.995862	55
Neuronal pentraxin-1	NPTX1	composite	68	Yes	-0.11 (0.97)	0.07 (-0.34, 0.47)	0.745448	0.955875	-0.38 (1.2)	0.36 (-0.03, 0.76)	0.0675413	0.45644	-0.87 (1.13)	0.85 (0.34, 1.36)	0.00141933	0.0285565	0.25 (1.28)	-0.25 (-1.02, 0.53)	0.526693	0.804537	-0.09 (0.86)	0.03 (-0.34, 0.4)	0.876793	0.985963	0.01 (0.64)	-0.12 (-0.46, 0.21)	0.468555	0.790616	-0.33 (0.76)	0.31 (-0.09, 0.72)	0.126897	0.461448	-0.05 (0.79)	-0.21 (-0.81, 0.4)	0.496463	0.873725	55
Neurexin-1	NRXN1	composite	69	Yes	0 (0.91)	0.01 (-0.38, 0.41)	0.950463	0.967713	-0.24 (1.1)	0.23 (-0.15, 0.6)	0.23049	0.55716	-0.62 (0.98)	0.64 (0.15, 1.13)	0.0107737	0.0654505	0.24 (0.84)	-0.24 (-0.99, 0.5)	0.518222	0.804537	-0.01 (0.95)	-0.02 (-0.42, 0.37)	0.907626	0.985963	0.15 (0.65)	-0.24 (-0.57, 0.1)	0.169616	0.710635	-0.25 (0.83)	0.26 (-0.16, 0.68)	0.216362	0.482347	-0.06 (0.92)	-0.2 (-0.83, 0.42)	0.515176	0.873725	55
Neurexin-2	NRXN2	composite	70	Yes	-0.01 (1.02)	0.01 (-0.4, 0.43)	0.943034	0.967713	-0.33 (1.16)	0.32 (-0.06, 0.71)	0.099843	0.475723	-0.76 (0.98)	0.77 (0.29, 1.26)	0.0022298	0.0299158	0.2 (1.1)	-0.21 (-0.97, 0.56)	0.588627	0.804537	-0.13 (0.98)	0.09 (-0.32, 0.49)	0.666166	0.985963	-0.01 (0.67)	-0.1 (-0.44, 0.23)	0.542525	0.811621	-0.42 (0.88)	0.4 (-0.03, 0.82)	0.0650495	0.461448	-0.24 (0.99)	0 (-0.65, 0.64)	0.989679	0.996942	55
Contactin-1	CNTN1	composite	71	Yes	0.03 (0.96)	0 (-0.38, 0.38)	0.993358	0.993358	-0.16 (0.99)	0.14 (-0.2, 0.47)	0.430621	0.679486	-0.64 (0.94)	0.63 (0.18, 1.09)	0.00724888	0.0550461	0.13 (0.78)	-0.2 (-0.9, 0.5)	0.574806	0.804537	-0.01 (0.92)	0 (-0.4, 0.4)	0.99042	0.99605	0.17 (0.64)	-0.18 (-0.53, 0.18)	0.327118	0.779311	-0.18 (0.81)	0.2 (-0.22, 0.63)	0.341296	0.598754	0 (0.91)	-0.22 (-0.88, 0.43)	0.501506	0.873725	55
Contactin-associated protein-like 2	CNTNAP2	VDNAPDQQNSHPDLAQEEIR	72	Yes	0.04 (0.98)	-0.1 (-0.5, 0.31)	0.645123	0.916754	-0.57 (3.33)	0.54 (-0.35, 1.43)	0.229814	0.55716	-1.14 (3.64)	1.02 (-0.01, 2.06)	0.0527919	0.163941	-0.26 (1.04)	0.27 (-0.5, 1.05)	0.48499	0.804537	-0.06 (0.81)	-0.01 (-0.43, 0.41)	0.97665	0.992996	-0.12 (0.66)	0 (-0.45, 0.44)	0.987445	0.990304	-0.18 (0.76)	0.08 (-0.38, 0.53)	0.735701	0.872074	0.29 (0.72)	-0.68 (-1.46, 0.11)	0.0880428	0.873725	43
Neuronal pentraxin receptor	NPTXR	composite	73	Yes	-0.16 (0.87)	0.14 (-0.25, 0.52)	0.480739	0.822673	-0.5 (1.14)	0.49 (0.11, 0.87)	0.0122492	0.186034	-1.12 (1.16)	1.11 (0.59, 1.63)	5.08828e-05	0.00309113	0.37 (0.94)	-0.37 (-1.11, 0.38)	0.328283	0.804537	-0.15 (0.88)	0.12 (-0.26, 0.5)	0.544871	0.985963	-0.1 (0.65)	0.01 (-0.34, 0.36)	0.941645	0.973339	-0.59 (0.82)	0.59 (0.18, 1)	0.00538044	0.142749	0.11 (0.69)	-0.37 (-0.97, 0.23)	0.218973	0.873725	55
Neuronal pentraxin-2	NPTX2	composite	74	Yes	-0.08 (1.02)	0.02 (-0.38, 0.43)	0.916145	0.967713	-0.61 (1.32)	0.61 (0.2, 1.02)	0.00421373	0.102394	-1.06 (1.25)	1.03 (0.51, 1.55)	0.000166322	0.00808324	0.41 (1.02)	-0.4 (-1.13, 0.34)	0.286269	0.796265	-0.2 (0.92)	0.11 (-0.27, 0.49)	0.573496	0.985963	-0.32 (0.76)	0.15 (-0.21, 0.51)	0.411462	0.790616	-0.83 (0.84)	0.8 (0.39, 1.21)	0.000240276	0.0141936	0.05 (0.78)	-0.26 (-0.85, 0.34)	0.386336	0.873725	55
Vascular endothelial growth factor	VEGFA	single	75	No	-0.18 (0.91)	0.25 (-0.15, 0.64)	0.216094	0.620697	-0.56 (1.08)	0.54 (0.17, 0.9)	0.00404836	0.102394	-0.64 (0.94)	0.68 (0.2, 1.16)	0.00582698	0.0495063	0.17 (1.01)	-0.22 (-0.97, 0.53)	0.556981	0.804537	NA	NA	NA	NA	NA	NA	NA	NA	NA	NA	NA	NA	NA	NA	NA	NA	0
ProSAAS	PCSK1	composite	76	Yes	-0.2 (1.1)	0.22 (-0.2, 0.64)	0.299662	0.700173	-0.36 (1.14)	0.33 (-0.04, 0.71)	0.0835095	0.468779	-0.87 (0.94)	0.89 (0.4, 1.37)	0.000464604	0.0125443	0.17 (0.84)	-0.24 (-0.99, 0.5)	0.518932	0.804537	-0.2 (0.73)	0.19 (-0.16, 0.53)	0.284844	0.985963	-0.09 (0.7)	0.06 (-0.3, 0.42)	0.744501	0.918289	-0.56 (0.96)	0.61 (0.18, 1.03)	0.00587446	0.142749	-0.12 (0.55)	-0.2 (-0.76, 0.36)	0.467831	0.873725	55
VPS10 domain-containing receptor SorCS1	SORCS1	TIAVYEEFR	77	Yes	0.02 (1.11)	-0.02 (-0.45, 0.4)	0.911471	0.967713	-0.23 (1.15)	0.2 (-0.18, 0.59)	0.294915	0.559878	-0.57 (0.97)	0.53 (0.05, 1.02)	0.0325314	0.1215	0.31 (0.94)	-0.38 (-1.14, 0.38)	0.325932	0.804537	-0.03 (1.08)	-0.03 (-0.46, 0.39)	0.8746	0.985963	0.07 (0.79)	-0.18 (-0.55, 0.18)	0.322365	0.779311	-0.4 (1.01)	0.37 (-0.06, 0.8)	0.0941652	0.461448	-0.3 (1.09)	0.05 (-0.6, 0.71)	0.874082	0.954083	55
Monokine induced by gamma interferon	CXCL9	single	78	No	0.12 (1.5)	-0.06 (-0.52, 0.4)	0.800278	0.967713	-0.51 (1.36)	0.47 (0.07, 0.87)	0.0214683	0.260844	-0.15 (1.41)	0.09 (-0.43, 0.61)	0.735295	0.850842	-0.79 (0.61)	0.7 (-0.03, 1.43)	0.0602518	0.768706	NA	NA	NA	NA	NA	NA	NA	NA	NA	NA	NA	NA	NA	NA	NA	NA	0
Trefoil factor 3	TFF3	single	79	No	-0.23 (0.82)	0.29 (-0.08, 0.66)	0.120065	0.463109	-0.42 (0.91)	0.4 (0.08, 0.71)	0.0139078	0.198799	-0.54 (0.98)	0.53 (0.07, 1)	0.0253943	0.106393	-0.4 (0.67)	0.32 (-0.4, 1.04)	0.381083	0.804537	NA	NA	NA	NA	NA	NA	NA	NA	NA	NA	NA	NA	NA	NA	NA	NA	0
Cell surface glycoprotein MUC18	MCAM	composite	80	Yes	-0.18 (0.97)	0.2 (-0.2, 0.59)	0.328075	0.703829	-0.4 (1.12)	0.38 (0.01, 0.75)	0.044366	0.445953	-0.81 (0.98)	0.79 (0.33, 1.26)	0.00114338	0.0252584	0.03 (0.79)	-0.09 (-0.82, 0.64)	0.802875	0.925321	-0.11 (1.04)	0.12 (-0.31, 0.54)	0.587581	0.985963	0.09 (0.71)	-0.09 (-0.46, 0.28)	0.629895	0.884766	-0.24 (0.83)	0.28 (-0.15, 0.7)	0.196735	0.465348	-0.23 (0.97)	0 (-0.67, 0.66)	0.9955	0.996942	55
Exostosin-like 2	EXTL2	VIVVWNNIGEK	81	Yes	-0.28 (1.03)	0.36 (-0.04, 0.77)	0.0776009	0.348726	-0.17 (0.88)	0.15 (-0.17, 0.47)	0.357379	0.636661	-0.42 (1.07)	0.48 (0, 0.96)	0.0478214	0.154941	0.15 (0.8)	-0.17 (-0.91, 0.56)	0.641214	0.804537	-0.07 (0.83)	0.04 (-0.33, 0.42)	0.82133	0.985963	0.08 (0.61)	-0.14 (-0.49, 0.21)	0.422053	0.790616	-0.34 (0.82)	0.34 (-0.08, 0.76)	0.112149	0.461448	-0.06 (0.74)	-0.16 (-0.79, 0.47)	0.606008	0.873725	55
Fibromodulin	FMOD	YLPFVPSR	82	Yes	-0.28 (0.87)	0.34 (-0.05, 0.73)	0.08381	0.348726	-0.19 (0.7)	0.2 (-0.11, 0.5)	0.203197	0.55716	-0.2 (0.89)	0.3 (-0.16, 0.76)	0.195883	0.355221	-0.28 (1.13)	0.3 (-0.47, 1.07)	0.442297	0.804537	0.02 (1.1)	-0.08 (-0.52, 0.35)	0.706196	0.985963	-0.01 (0.67)	-0.08 (-0.44, 0.29)	0.681969	0.897299	-0.12 (0.7)	0.08 (-0.33, 0.49)	0.706041	0.861582	0.12 (0.86)	-0.23 (-0.88, 0.43)	0.495954	0.873725	55
Dystroglycan	DAG1	composite	83	Yes	-0.14 (1.04)	0.18 (-0.21, 0.57)	0.362052	0.703829	-0.24 (0.89)	0.21 (-0.1, 0.53)	0.179843	0.55716	-0.53 (0.85)	0.54 (0.11, 0.97)	0.0148512	0.0801966	0.25 (0.6)	-0.35 (-1.02, 0.33)	0.313393	0.804537	-0.12 (0.9)	0.13 (-0.27, 0.53)	0.523569	0.985963	0.21 (0.6)	-0.19 (-0.55, 0.17)	0.291286	0.743929	-0.12 (0.69)	0.15 (-0.26, 0.55)	0.472541	0.695924	-0.06 (0.81)	-0.12 (-0.78, 0.53)	0.711089	0.886674	55
Cell adhesion molecule 3	CADM3	composite	84	Yes	-0.14 (0.91)	0.18 (-0.2, 0.56)	0.361378	0.703829	-0.2 (1)	0.18 (-0.16, 0.52)	0.304098	0.572835	-0.63 (0.82)	0.65 (0.21, 1.1)	0.00466374	0.0453315	0.26 (0.82)	-0.32 (-1.03, 0.4)	0.377865	0.804537	-0.14 (0.89)	0.14 (-0.25, 0.54)	0.468186	0.985963	0.1 (0.65)	-0.11 (-0.47, 0.26)	0.555375	0.822903	-0.27 (0.79)	0.3 (-0.13, 0.72)	0.167109	0.461448	-0.12 (0.85)	-0.11 (-0.76, 0.54)	0.732618	0.890867	55
Receptor-type tyrosine-protein phosphatase-like N	PTPRN	composite	85	Yes	-0.1 (1.07)	0.1 (-0.31, 0.51)	0.630604	0.912124	-0.34 (1.06)	0.32 (-0.05, 0.68)	0.0857369	0.468779	-0.77 (0.88)	0.77 (0.3, 1.23)	0.00164523	0.0285565	0.38 (0.87)	-0.43 (-1.16, 0.3)	0.244621	0.771034	-0.19 (0.81)	0.2 (-0.17, 0.57)	0.292258	0.985963	0.06 (0.76)	-0.08 (-0.46, 0.3)	0.694207	0.897299	-0.42 (0.9)	0.47 (0.04, 0.89)	0.0338588	0.391794	0.06 (0.66)	-0.35 (-0.95, 0.25)	0.247537	0.873725	55
Pigment epithelium-derived factor	SERPINF1	composite	86	Yes	-0.05 (0.84)	0.12 (-0.25, 0.48)	0.526754	0.848014	-0.25 (0.78)	0.24 (-0.06, 0.54)	0.121651	0.493698	-0.46 (1.09)	0.52 (0.05, 0.98)	0.0310377	0.1215	-0.01 (0.37)	0 (-0.67, 0.68)	0.991308	0.997242	-0.05 (1.06)	0.01 (-0.42, 0.44)	0.970927	0.991325	0.05 (0.81)	-0.04 (-0.44, 0.36)	0.856179	0.970569	-0.24 (0.81)	0.27 (-0.15, 0.69)	0.204906	0.465348	0.19 (1.02)	-0.42 (-1.1, 0.25)	0.215831	0.873725	55
Neurosecretory protein VGF	VGF	composite	87	Yes	-0.22 (1.04)	0.19 (-0.22, 0.61)	0.361875	0.703829	-0.4 (1.16)	0.37 (-0.01, 0.75)	0.0585663	0.45644	-0.95 (1.06)	0.94 (0.43, 1.45)	0.000408388	0.0124048	0.44 (0.81)	-0.49 (-1.24, 0.26)	0.195249	0.771034	-0.29 (0.82)	0.29 (-0.07, 0.65)	0.116123	0.985963	-0.11 (0.77)	0.07 (-0.31, 0.44)	0.714841	0.908064	-0.62 (0.91)	0.66 (0.25, 1.08)	0.00214328	0.086803	-0.06 (0.52)	-0.25 (-0.81, 0.32)	0.389913	0.873725	55
Peptidyl-glycine alpha-amidating monooxygenase	PAM	composite	88	Yes	-0.13 (1.04)	0.13 (-0.28, 0.54)	0.533306	0.852588	-0.36 (1.17)	0.33 (-0.05, 0.72)	0.0844208	0.468779	-0.86 (1.02)	0.86 (0.37, 1.35)	0.00077082	0.0187309	0.36 (0.95)	-0.44 (-1.18, 0.31)	0.24656	0.771034	-0.16 (0.9)	0.15 (-0.23, 0.54)	0.427991	0.985963	0.05 (0.63)	-0.06 (-0.41, 0.29)	0.717098	0.908064	-0.37 (0.78)	0.41 (0, 0.81)	0.0478401	0.430561	-0.03 (0.71)	-0.29 (-0.88, 0.3)	0.33036	0.873725	55
Thrombomodulin	THBD	single	89	No	-0.35 (1.45)	0.42 (-0.06, 0.91)	0.0844409	0.348726	-0.2 (0.86)	0.19 (-0.13, 0.5)	0.239801	0.55716	-0.23 (1.02)	0.28 (-0.19, 0.75)	0.236719	0.405902	0.24 (0.84)	-0.27 (-0.99, 0.44)	0.448025	0.804537	NA	NA	NA	NA	NA	NA	NA	NA	NA	NA	NA	NA	NA	NA	NA	NA	0
Alpha-1-antitrypsin	SERPINA1	AVLTIDEK	90	Yes	-0.3 (1.59)	0.36 (-0.16, 0.88)	0.176337	0.571332	-0.09 (1.97)	0.12 (-0.44, 0.68)	0.678087	0.843241	-1.11 (3.55)	1.14 (0.15, 2.13)	0.024869	0.106393	0.39 (1.14)	-0.3 (-1.08, 0.47)	0.435815	0.804537	0.19 (0.83)	-0.18 (-0.56, 0.2)	0.34618	0.985963	0.05 (0.61)	0.09 (-0.26, 0.45)	0.609693	0.864347	0.34 (0.89)	-0.28 (-0.71, 0.16)	0.207902	0.46778	0.04 (0.66)	0.13 (-0.5, 0.76)	0.677934	0.878127	51
CD59 glycoprotein	CD59	AGLQVYNK	91	Yes	-0.12 (0.99)	0.15 (-0.24, 0.55)	0.445748	0.802347	-0.3 (1.12)	0.27 (-0.1, 0.64)	0.147459	0.526948	-0.7 (1.03)	0.68 (0.19, 1.16)	0.00669963	0.054267	0.09 (0.91)	-0.17 (-0.93, 0.58)	0.644432	0.804537	-0.09 (0.83)	0.1 (-0.28, 0.49)	0.588016	0.985963	0.15 (0.64)	-0.07 (-0.44, 0.29)	0.691409	0.897299	-0.33 (0.65)	0.35 (-0.05, 0.76)	0.0845486	0.461448	-0.03 (0.7)	-0.13 (-0.78, 0.52)	0.695342	0.880042	55
N-acetyllactosaminide beta-1,3-N-acetylglucosaminyltransferase	B4GAT1	composite	92	Yes	0.03 (0.96)	-0.05 (-0.44, 0.34)	0.791786	0.967713	-0.2 (1.1)	0.18 (-0.18, 0.55)	0.321723	0.597397	-0.61 (0.98)	0.57 (0.09, 1.04)	0.0201788	0.0961459	0.33 (1.2)	-0.41 (-1.16, 0.34)	0.28245	0.796265	0 (0.95)	-0.03 (-0.43, 0.37)	0.87442	0.985963	0.13 (0.58)	-0.17 (-0.51, 0.17)	0.325465	0.779311	-0.24 (0.88)	0.26 (-0.18, 0.69)	0.238909	0.500473	0 (0.7)	-0.2 (-0.83, 0.43)	0.521602	0.873725	55
CD40 antigen	CD40	single	93	No	-0.05 (1.05)	0.02 (-0.36, 0.4)	0.911625	0.967713	-0.37 (1.03)	0.33 (-0.02, 0.67)	0.0625387	0.45644	-0.64 (0.86)	0.53 (0.1, 0.97)	0.0173643	0.0861128	-0.01 (0.62)	-0.18 (-0.87, 0.5)	0.595738	0.804537	NA	NA	NA	NA	NA	NA	NA	NA	NA	NA	NA	NA	NA	NA	NA	NA	0
Complement C1q subcomponent subunit B	C1QB	composite	94	Yes	-0.04 (0.94)	0.15 (-0.19, 0.49)	0.388922	0.73262	-0.2 (0.82)	0.17 (-0.12, 0.46)	0.237375	0.55716	-0.41 (1.16)	0.45 (0.01, 0.89)	0.0457775	0.152383	-0.22 (0.64)	0.08 (-0.54, 0.7)	0.803468	0.925321	0.04 (0.99)	0.04 (-0.36, 0.44)	0.835429	0.985963	0.15 (0.8)	0.02 (-0.38, 0.41)	0.936026	0.972027	-0.2 (0.87)	0.31 (-0.12, 0.73)	0.15531	0.461448	-0.04 (0.99)	-0.22 (-0.88, 0.44)	0.50824	0.873725	55
Golgi membrane protein 1	GOLM1	QQLQALSEPQPR	95	No	-0.11 (0.94)	0.07 (-0.33, 0.46)	0.735621	0.955875	-0.02 (1.01)	-0.02 (-0.37, 0.33)	0.917128	0.946155	-0.61 (0.73)	0.54 (0.08, 0.99)	0.0215681	0.0996156	-0.18 (0.5)	0.09 (-0.64, 0.81)	0.813948	0.928588	NA	NA	NA	NA	NA	NA	NA	NA	NA	NA	NA	NA	NA	NA	NA	NA	0
Amyloid beta A4 protein	APP	LVFFAEDVGSNK	96	Yes	-0.27 (0.91)	0.26 (-0.14, 0.66)	0.203593	0.620697	-0.32 (1.02)	0.3 (-0.06, 0.66)	0.103763	0.484892	-0.78 (0.9)	0.77 (0.28, 1.25)	0.0023391	0.0299158	0.32 (0.91)	-0.35 (-1.12, 0.41)	0.358802	0.804537	-0.09 (0.94)	0.1 (-0.31, 0.51)	0.636794	0.985963	0.15 (0.76)	-0.22 (-0.59, 0.16)	0.263345	0.743929	-0.05 (0.89)	0.08 (-0.36, 0.52)	0.716063	0.861582	0.2 (0.72)	-0.44 (-1.06, 0.19)	0.164295	0.873725	51
Amyloid beta-38	APP	single	97	Yes	-0.23 (0.84)	0.19 (-0.2, 0.57)	0.338555	0.703829	-0.28 (0.87)	0.27 (-0.06, 0.61)	0.106435	0.487996	-0.69 (0.7)	0.63 (0.17, 1.09)	0.00796394	0.0586436	0.26 (0.87)	-0.31 (-1.07, 0.45)	0.415235	0.804537	-0.03 (1)	0.16 (-0.24, 0.55)	0.436647	0.985963	0.2 (1.05)	-0.14 (-0.6, 0.32)	0.540743	0.811621	-0.1 (1.07)	0.2 (-0.28, 0.67)	0.410913	0.624075	-0.17 (0.69)	-0.05 (-0.68, 0.58)	0.869048	0.954083	55
Amyloid beta-40	APP	single	98	Yes	-0.28 (0.79)	0.24 (-0.14, 0.61)	0.219462	0.620697	-0.33 (0.79)	0.31 (-0.01, 0.63)	0.0550559	0.445953	-0.63 (0.69)	0.56 (0.1, 1.02)	0.0168826	0.0854681	0.41 (0.8)	-0.47 (-1.22, 0.28)	0.216349	0.771034	-0.01 (0.93)	0.13 (-0.25, 0.51)	0.507343	0.985963	0.27 (0.99)	-0.22 (-0.66, 0.23)	0.338906	0.790616	0.05 (1.03)	0.01 (-0.46, 0.48)	0.965345	0.989784	-0.17 (0.61)	0 (-0.64, 0.63)	0.98817	0.996942	55
Prostaglandin-H2 D-isomerase	PTGDS	composite	99	Yes	-0.03 (1.11)	0.1 (-0.31, 0.5)	0.638119	0.916754	-0.25 (1.03)	0.23 (-0.12, 0.57)	0.196065	0.55716	-0.55 (1.03)	0.58 (0.12, 1.04)	0.0138949	0.0785223	0.32 (0.82)	-0.43 (-1.13, 0.27)	0.221701	0.771034	0.09 (0.97)	-0.09 (-0.5, 0.32)	0.668017	0.985963	0.17 (0.63)	-0.13 (-0.5, 0.23)	0.471509	0.790616	-0.12 (0.62)	0.18 (-0.21, 0.58)	0.362535	0.602142	0.21 (0.64)	-0.38 (-1.02, 0.26)	0.237471	0.873725	55
Tumor necrosis factor receptor superfamily member 21	TNFRSF21	ASNLIGTYR	100	Yes	0.04 (1.09)	-0.07 (-0.5, 0.35)	0.726717	0.955875	-0.12 (1.11)	0.09 (-0.28, 0.46)	0.639492	0.809357	-0.55 (1.09)	0.53 (0.02, 1.04)	0.0428509	0.146659	0.32 (1.1)	-0.41 (-1.18, 0.36)	0.29633	0.804537	-0.07 (0.81)	0.08 (-0.28, 0.45)	0.647435	0.985963	0.19 (0.76)	-0.2 (-0.59, 0.18)	0.289003	0.743929	-0.24 (0.86)	0.3 (-0.11, 0.72)	0.152786	0.461448	-0.06 (0.71)	-0.22 (-0.84, 0.39)	0.467182	0.873725	55
SPARC-like protein 1	SPARCL1	composite	101	Yes	0 (0.87)	-0.02 (-0.39, 0.35)	0.9108	0.967713	-0.01 (0.89)	-0.02 (-0.34, 0.31)	0.922232	0.946155	-0.46 (0.75)	0.44 (0, 0.89)	0.0498288	0.159321	0.55 (0.73)	-0.61 (-1.31, 0.09)	0.0870538	0.768706	-0.01 (0.9)	-0.02 (-0.4, 0.36)	0.92105	0.985963	0.22 (0.73)	-0.24 (-0.61, 0.14)	0.215409	0.743929	-0.24 (0.85)	0.28 (-0.14, 0.7)	0.190223	0.463053	0.09 (0.73)	-0.38 (-0.97, 0.21)	0.201424	0.873725	55
Fibulin-1	FBLN1	composite	102	Yes	-0.17 (0.91)	0.23 (-0.12, 0.59)	0.193968	0.620187	-0.19 (0.76)	0.18 (-0.1, 0.46)	0.209496	0.55716	-0.62 (0.88)	0.66 (0.25, 1.08)	0.00196713	0.0298758	0.07 (0.62)	-0.12 (-0.73, 0.5)	0.701389	0.827367	0.04 (0.9)	-0.06 (-0.45, 0.34)	0.772735	0.985963	0.11 (0.66)	-0.07 (-0.43, 0.29)	0.691089	0.897299	-0.11 (0.63)	0.14 (-0.25, 0.53)	0.478887	0.701021	0.06 (0.9)	-0.26 (-0.92, 0.41)	0.442286	0.873725	55
Neurexin-3	NRXN3	composite	103	Yes	0.05 (0.97)	-0.09 (-0.48, 0.31)	0.671734	0.932751	-0.26 (1.13)	0.24 (-0.13, 0.62)	0.20146	0.55716	-0.68 (1)	0.66 (0.17, 1.14)	0.00880988	0.0629647	0.43 (1.13)	-0.44 (-1.19, 0.31)	0.246762	0.771034	-0.02 (0.87)	-0.02 (-0.4, 0.35)	0.898985	0.985963	0.03 (0.61)	-0.13 (-0.46, 0.2)	0.443489	0.790616	-0.31 (0.8)	0.31 (-0.1, 0.71)	0.140424	0.461448	-0.08 (0.74)	-0.17 (-0.77, 0.43)	0.575058	0.873725	55
Protein FAM3C	FAM3C	composite	104	Yes	-0.07 (0.84)	0.05 (-0.32, 0.42)	0.785149	0.967713	-0.2 (0.95)	0.18 (-0.15, 0.52)	0.283753	0.559878	-0.61 (0.88)	0.59 (0.13, 1.06)	0.0131839	0.0762782	0.25 (0.97)	-0.31 (-1.03, 0.42)	0.40318	0.804537	-0.04 (0.87)	0.03 (-0.36, 0.41)	0.890401	0.985963	0.18 (0.67)	-0.22 (-0.59, 0.15)	0.241894	0.743929	-0.23 (0.81)	0.25 (-0.17, 0.67)	0.237802	0.500473	0.12 (0.59)	-0.36 (-0.96, 0.24)	0.236683	0.873725	55
Poliovirus receptor-related protein 1	NECTIN1	ITQVTWQK	105	Yes	0.05 (1)	-0.07 (-0.49, 0.35)	0.740897	0.955875	-0.06 (0.99)	0.04 (-0.31, 0.4)	0.81248	0.926914	-0.59 (0.86)	0.56 (0.08, 1.04)	0.0217269	0.0996156	0.17 (0.93)	-0.2 (-0.97, 0.56)	0.595774	0.804537	-0.16 (0.78)	0.18 (-0.18, 0.53)	0.323591	0.985963	0.11 (0.6)	-0.14 (-0.48, 0.21)	0.435938	0.790616	-0.34 (0.81)	0.37 (-0.04, 0.78)	0.0742073	0.461448	-0.03 (0.66)	-0.24 (-0.85, 0.38)	0.443296	0.873725	55
Neurocan core protein	NCAN	composite	106	Yes	0.05 (1.02)	-0.08 (-0.49, 0.33)	0.690896	0.939792	-0.18 (1.09)	0.15 (-0.21, 0.52)	0.406682	0.6573	-0.69 (1.02)	0.67 (0.17, 1.16)	0.00942823	0.0634884	0.46 (0.84)	-0.5 (-1.25, 0.25)	0.186378	0.768706	0.02 (0.86)	-0.03 (-0.41, 0.34)	0.868821	0.985963	0.18 (0.66)	-0.24 (-0.59, 0.1)	0.165823	0.710635	-0.31 (0.95)	0.34 (-0.09, 0.77)	0.124349	0.461448	-0.04 (0.85)	-0.24 (-0.86, 0.39)	0.448565	0.873725	55
Neuronal cell adhesion molecule	NRCAM	composite	107	Yes	0.05 (1.02)	-0.07 (-0.48, 0.34)	0.743065	0.955875	-0.23 (1.03)	0.21 (-0.15, 0.56)	0.254856	0.55716	-0.7 (0.93)	0.69 (0.2, 1.17)	0.00590816	0.0495063	0.45 (1.02)	-0.51 (-1.26, 0.25)	0.184983	0.768706	-0.09 (0.83)	0.08 (-0.29, 0.45)	0.666337	0.985963	0.14 (0.62)	-0.18 (-0.53, 0.16)	0.29996	0.751445	-0.32 (0.78)	0.35 (-0.06, 0.75)	0.094351	0.461448	-0.07 (0.67)	-0.21 (-0.81, 0.4)	0.495181	0.873725	55
Neogenin	NEO1	DVVASLVSTR	108	Yes	0.05 (1.11)	-0.02 (-0.45, 0.41)	0.920466	0.967713	-0.24 (1.12)	0.22 (-0.16, 0.6)	0.248628	0.55716	-0.54 (0.99)	0.55 (0.06, 1.04)	0.0278793	0.114825	0.23 (0.97)	-0.29 (-1.05, 0.48)	0.456439	0.804537	-0.03 (0.88)	0.02 (-0.37, 0.4)	0.935772	0.985963	0.17 (0.62)	-0.22 (-0.57, 0.13)	0.219926	0.743929	-0.25 (0.81)	0.27 (-0.15, 0.69)	0.20219	0.465348	-0.04 (0.76)	-0.17 (-0.81, 0.46)	0.587363	0.873725	55
Neural cell adhesion molecule 1	NCAM1	composite	109	Yes	-0.03 (0.93)	0.04 (-0.35, 0.44)	0.823263	0.967713	-0.13 (0.93)	0.11 (-0.23, 0.45)	0.508006	0.707206	-0.51 (0.88)	0.51 (0.04, 0.99)	0.0334999	0.1215	0.19 (0.84)	-0.25 (-1, 0.49)	0.501079	0.804537	-0.04 (0.82)	0.04 (-0.34, 0.42)	0.835911	0.985963	0.17 (0.61)	-0.22 (-0.57, 0.14)	0.224236	0.743929	-0.21 (0.78)	0.23 (-0.18, 0.65)	0.269096	0.514885	0.02 (0.69)	-0.23 (-0.86, 0.4)	0.466593	0.873725	55
Cadherin-13	CDH13	composite	110	Yes	0.12 (1.11)	-0.14 (-0.56, 0.28)	0.520373	0.848014	-0.13 (1.13)	0.1 (-0.27, 0.48)	0.579015	0.773081	-0.57 (1.04)	0.56 (0.07, 1.05)	0.0250193	0.106393	0.5 (0.89)	-0.53 (-1.27, 0.21)	0.154489	0.768706	-0.04 (0.84)	0.07 (-0.3, 0.43)	0.724892	0.985963	0.32 (0.8)	-0.29 (-0.67, 0.1)	0.147008	0.674019	-0.13 (0.92)	0.2 (-0.22, 0.62)	0.341094	0.598754	-0.03 (0.64)	-0.25 (-0.86, 0.36)	0.411192	0.873725	55
Latrophilin-1	ADGRL1	LVVSQLNPYTLR	111	Yes	-0.06 (1.11)	0.04 (-0.39, 0.47)	0.842437	0.967713	-0.35 (1.14)	0.32 (-0.06, 0.7)	0.09618	0.475723	-0.76 (1.18)	0.74 (0.22, 1.26)	0.00586401	0.0495063	0.52 (1.14)	-0.58 (-1.36, 0.2)	0.143458	0.768706	-0.1 (0.86)	0.07 (-0.31, 0.46)	0.70707	0.985963	0.07 (0.62)	-0.14 (-0.48, 0.2)	0.414842	0.790616	-0.32 (0.81)	0.33 (-0.08, 0.75)	0.111884	0.461448	-0.03 (0.83)	-0.19 (-0.83, 0.44)	0.544081	0.873725	55
Calsyntenin-1	CLSTN1	composite	112	Yes	0.05 (0.98)	-0.07 (-0.47, 0.34)	0.747392	0.955875	-0.05 (1.07)	0.03 (-0.34, 0.4)	0.870106	0.942559	-0.54 (0.95)	0.53 (0.05, 1.02)	0.0318878	0.1215	0.42 (1.01)	-0.48 (-1.24, 0.28)	0.213099	0.771034	-0.02 (0.92)	0 (-0.39, 0.39)	0.991951	0.99605	0.16 (0.67)	-0.24 (-0.58, 0.11)	0.180002	0.741362	-0.27 (0.86)	0.3 (-0.12, 0.72)	0.16353	0.461448	-0.09 (0.88)	-0.19 (-0.81, 0.43)	0.543572	0.873725	55
Voltage-dependent calcium channel subunit alpha-2 delta-1	CACNA2D1	composite	113	Yes	-0.01 (1.06)	-0.01 (-0.43, 0.41)	0.959749	0.967713	-0.32 (1.04)	0.3 (-0.06, 0.66)	0.0994467	0.475723	-0.84 (1.07)	0.83 (0.32, 1.33)	0.00161121	0.0285565	0.42 (0.76)	-0.45 (-1.19, 0.29)	0.225484	0.771034	-0.03 (0.82)	0.02 (-0.35, 0.38)	0.9336	0.985963	0.1 (0.71)	-0.13 (-0.5, 0.24)	0.485657	0.790616	-0.34 (0.82)	0.37 (-0.04, 0.78)	0.0757068	0.461448	0.01 (0.65)	-0.28 (-0.88, 0.32)	0.351323	0.873725	55
Neuronal growth regulator 1	NEGR1	composite	114	Yes	0 (0.96)	-0.02 (-0.42, 0.38)	0.905608	0.967713	-0.3 (1.13)	0.28 (-0.1, 0.66)	0.144542	0.524236	-0.67 (0.96)	0.65 (0.16, 1.13)	0.00966696	0.0634884	0.33 (1.14)	-0.34 (-1.11, 0.42)	0.373259	0.804537	-0.06 (0.89)	0.03 (-0.35, 0.41)	0.876162	0.985963	0.05 (0.62)	-0.11 (-0.45, 0.23)	0.506657	0.790616	-0.26 (0.81)	0.28 (-0.14, 0.69)	0.183893	0.462756	-0.17 (0.82)	-0.08 (-0.7, 0.54)	0.794419	0.932579	55
Beta-nerve growth factor	NGF	SAPAAAIAAR	115	No	0.01 (1.16)	0.05 (-0.38, 0.48)	0.82939	0.967713	-0.51 (4.18)	0.48 (-0.62, 1.59)	0.390155	0.653846	-0.5 (1.36)	0.56 (0.01, 1.11)	0.0447453	0.151016	0.94 (0.78)	-0.99 (-1.74, -0.24)	0.0107748	0.768706	NA	NA	NA	NA	NA	NA	NA	NA	NA	NA	NA	NA	NA	NA	NA	NA	0
Seizure 6-like protein	SEZ6L	composite	116	Yes	0.04 (1.07)	-0.05 (-0.47, 0.37)	0.814832	0.967713	-0.24 (1.08)	0.21 (-0.16, 0.58)	0.259671	0.55716	-0.67 (0.91)	0.67 (0.19, 1.15)	0.00715089	0.0550461	0.35 (0.9)	-0.41 (-1.17, 0.34)	0.27729	0.792722	-0.11 (0.84)	0.11 (-0.26, 0.48)	0.565843	0.985963	0.15 (0.64)	-0.16 (-0.51, 0.19)	0.373792	0.790616	-0.34 (0.9)	0.39 (-0.04, 0.81)	0.076206	0.461448	-0.2 (0.88)	-0.07 (-0.71, 0.56)	0.813305	0.941854	55
Glutamate receptor 4	GRM4	composite	117	No	0.03 (0.91)	-0.04 (-0.43, 0.35)	0.825511	0.967713	-0.23 (1.09)	0.23 (-0.14, 0.61)	0.213113	0.55716	-0.47 (0.84)	0.47 (0.01, 0.94)	0.0465346	0.15281	0.24 (1.13)	-0.22 (-0.97, 0.53)	0.564596	0.804537	NA	NA	NA	NA	NA	NA	NA	NA	NA	NA	NA	NA	NA	NA	NA	NA	0
Protein kinase C-binding protein NELL2	NELL2	composite	118	Yes	0.02 (1.01)	-0.03 (-0.43, 0.38)	0.892084	0.967713	-0.25 (1.07)	0.23 (-0.14, 0.59)	0.218904	0.55716	-0.59 (0.92)	0.59 (0.11, 1.07)	0.0166687	0.0854681	0.47 (0.74)	-0.51 (-1.24, 0.23)	0.173332	0.768706	-0.11 (0.86)	0.09 (-0.28, 0.46)	0.64587	0.985963	0.12 (0.66)	-0.16 (-0.51, 0.19)	0.367081	0.790616	-0.36 (0.87)	0.4 (-0.02, 0.81)	0.0588859	0.457143	-0.16 (0.71)	-0.16 (-0.74, 0.43)	0.596357	0.873725	55
Cholecystokinin	CCK	composite	119	Yes	-0.01 (0.99)	-0.01 (-0.41, 0.38)	0.954514	0.967713	-0.15 (1.11)	0.13 (-0.24, 0.49)	0.496632	0.707206	-0.78 (1.07)	0.77 (0.28, 1.26)	0.00258573	0.0314166	0.48 (0.64)	-0.57 (-1.27, 0.13)	0.109159	0.768706	0.13 (0.9)	-0.05 (-0.44, 0.34)	0.802621	0.985963	0.17 (0.78)	-0.16 (-0.56, 0.24)	0.423124	0.790616	0.06 (0.88)	0.02 (-0.42, 0.46)	0.929855	0.973943	0.41 (0.63)	-0.66 (-1.3, -0.03)	0.0410365	0.873725	54
Secretogranin-1	CHGB	composite	120	Yes	-0.32 (0.71)	0.3 (-0.04, 0.65)	0.0854047	0.348726	-0.31 (0.99)	0.29 (-0.05, 0.64)	0.0931249	0.475723	-0.6 (0.8)	0.56 (0.11, 1)	0.0151963	0.080276	-0.05 (0.73)	0 (-0.69, 0.7)	0.993138	0.997242	-0.13 (0.97)	0.08 (-0.32, 0.49)	0.686724	0.985963	0.04 (0.69)	-0.13 (-0.49, 0.23)	0.474202	0.790616	-0.36 (0.76)	0.35 (-0.07, 0.76)	0.101162	0.461448	0.02 (0.8)	-0.22 (-0.86, 0.42)	0.491164	0.873725	55
Secretogranin-2	SCG2	composite	121	Yes	-0.04 (1.05)	0.03 (-0.38, 0.44)	0.894965	0.967713	-0.15 (1.15)	0.13 (-0.25, 0.51)	0.509453	0.707206	-0.64 (0.91)	0.63 (0.15, 1.11)	0.0105323	0.0654505	0.39 (0.83)	-0.45 (-1.19, 0.29)	0.232206	0.771034	-0.17 (0.82)	0.18 (-0.18, 0.55)	0.327978	0.985963	-0.01 (0.69)	-0.02 (-0.38, 0.34)	0.901426	0.970569	-0.38 (0.81)	0.42 (0.02, 0.82)	0.0391676	0.396572	0.17 (0.65)	-0.47 (-1.06, 0.11)	0.112426	0.873725	55
Secretogranin-3	SCG3	composite	122	Yes	-0.08 (0.77)	0.1 (-0.26, 0.46)	0.571592	0.884693	-0.13 (0.89)	0.12 (-0.2, 0.45)	0.459376	0.701191	-0.71 (0.85)	0.73 (0.28, 1.19)	0.00188229	0.0298758	0.37 (0.77)	-0.39 (-1.1, 0.31)	0.265879	0.771034	-0.14 (0.9)	0.14 (-0.26, 0.53)	0.489143	0.985963	0.15 (0.72)	-0.13 (-0.51, 0.26)	0.513471	0.790616	-0.23 (0.89)	0.29 (-0.15, 0.73)	0.196873	0.465348	0.08 (0.82)	-0.3 (-0.95, 0.34)	0.349716	0.873725	55
Proenkephalin-B	PDYN	composite	123	Yes	-0.07 (0.93)	0.06 (-0.33, 0.44)	0.77756	0.967713	-0.34 (1.11)	0.32 (-0.04, 0.69)	0.083345	0.468779	-0.79 (1.07)	0.78 (0.29, 1.27)	0.00213658	0.0299158	0.31 (0.9)	-0.34 (-1.06, 0.38)	0.346192	0.804537	-0.28 (0.93)	0.27 (-0.14, 0.67)	0.190416	0.985963	-0.19 (0.92)	0.08 (-0.34, 0.49)	0.719787	0.908064	-0.62 (0.79)	0.62 (0.2, 1.04)	0.00415191	0.142749	0.22 (1.21)	-0.43 (-1.12, 0.26)	0.219874	0.873725	55
Chromogranin-A	CHGA	EDSLEAGLPLQVR	124	Yes	-0.06 (1.05)	0.01 (-0.41, 0.43)	0.947199	0.967713	-0.12 (0.78)	0.11 (-0.21, 0.42)	0.51051	0.707206	-0.5 (0.65)	0.49 (0.03, 0.96)	0.0362534	0.129552	0.21 (0.69)	-0.24 (-0.99, 0.51)	0.52215	0.804537	0.02 (0.9)	0.01 (-0.38, 0.41)	0.956038	0.985963	0.06 (0.96)	-0.01 (-0.45, 0.42)	0.95013	0.974024	-0.36 (1.17)	0.41 (-0.1, 0.92)	0.112993	0.461448	0.12 (0.81)	-0.38 (-1, 0.25)	0.228384	0.873725	50
Inter-alpha-trypsin inhibitor heavy chain H5	ITIH5	SYLEITPSR	125	Yes	-0.18 (1.24)	0.21 (-0.25, 0.66)	0.375787	0.713407	-0.27 (1.21)	0.26 (-0.14, 0.66)	0.198448	0.55716	-0.72 (1.08)	0.74 (0.24, 1.24)	0.00400222	0.0420495	-0.52 (1.16)	0.54 (-0.24, 1.32)	0.173866	0.768706	0.09 (1.1)	-0.13 (-0.57, 0.31)	0.550907	0.985963	-0.08 (0.77)	0.02 (-0.35, 0.39)	0.911016	0.970569	-0.07 (0.97)	0.03 (-0.41, 0.48)	0.887578	0.958585	0.07 (0.87)	-0.25 (-0.9, 0.41)	0.447843	0.873725	55
Plexin domain-containing protein 1	PLXDC1	LYGPSEPHSR	126	Yes	0.05 (1.1)	-0.08 (-0.51, 0.35)	0.707483	0.955103	-0.54 (3.73)	0.47 (-0.5, 1.45)	0.338496	0.61384	-0.59 (0.99)	0.58 (0.08, 1.09)	0.0227912	0.100696	0.18 (1.36)	-0.18 (-0.98, 0.63)	0.660288	0.804537	0.2 (0.84)	-0.19 (-0.59, 0.21)	0.337418	0.985963	0.27 (0.78)	-0.3 (-0.71, 0.11)	0.14362	0.671148	-0.09 (0.95)	0.11 (-0.37, 0.58)	0.65439	0.834788	-0.04 (0.84)	-0.13 (-0.81, 0.55)	0.693108	0.880042	50
Protein CutA	CUTA	TQSSLVPALTDFVR	127	Yes	0.07 (0.89)	-0.05 (-0.45, 0.34)	0.784169	0.967713	-0.26 (1.17)	0.24 (-0.15, 0.63)	0.221111	0.55716	-0.52 (0.77)	0.51 (0.04, 0.97)	0.0332974	0.1215	0.58 (0.91)	-0.65 (-1.41, 0.1)	0.0882684	0.768706	-0.02 (0.9)	-0.04 (-0.43, 0.34)	0.830974	0.985963	0.15 (0.66)	-0.23 (-0.59, 0.14)	0.217894	0.743929	-0.13 (0.9)	0.11 (-0.33, 0.56)	0.611083	0.807029	0.21 (0.79)	-0.42 (-1.04, 0.19)	0.174229	0.873725	55
Protein-L-isoaspartate(D-aspartate) O-methyltransferase	PCMT1	VQLVVGDGR	128	Yes	0.06 (0.92)	-0.08 (-0.48, 0.32)	0.692275	0.939792	-0.25 (1.06)	0.24 (-0.13, 0.61)	0.200349	0.55716	-0.79 (1.03)	0.77 (0.27, 1.27)	0.00316136	0.0365815	0.01 (1.3)	-0.05 (-0.85, 0.74)	0.891323	0.954147	-0.09 (0.99)	0.13 (-0.27, 0.54)	0.521575	0.985963	0.32 (0.81)	-0.29 (-0.68, 0.1)	0.138406	0.664439	-0.27 (0.84)	0.26 (-0.16, 0.68)	0.22852	0.500473	-0.44 (0.7)	0.21 (-0.42, 0.84)	0.503244	0.873725	55
Neuroblastoma suppressor of tumorigenicity 1	NBL1	LALFPDK	129	Yes	-0.33 (1.12)	0.35 (-0.07, 0.78)	0.101693	0.39857	-0.27 (1.19)	0.24 (-0.15, 0.62)	0.226109	0.55716	-0.73 (1)	0.72 (0.24, 1.21)	0.00415303	0.0420495	0.4 (0.8)	-0.45 (-1.2, 0.29)	0.229038	0.771034	-0.1 (0.94)	0.09 (-0.31, 0.5)	0.649983	0.985963	0.12 (0.71)	-0.08 (-0.46, 0.3)	0.679588	0.897299	-0.23 (0.66)	0.28 (-0.12, 0.68)	0.160598	0.461448	0.03 (1.02)	-0.19 (-0.87, 0.49)	0.574453	0.873725	55
Macrophage inflammatory protein 1 beta	CCL4	single	130	No	-0.2 (0.88)	0.16 (-0.23, 0.55)	0.428406	0.776886	-0.1 (0.79)	0.09 (-0.23, 0.41)	0.589552	0.782009	-0.04 (0.66)	-0.02 (-0.48, 0.43)	0.917788	0.953087	0.88 (0.97)	-0.94 (-1.7, -0.17)	0.0171762	0.768706	NA	NA	NA	NA	NA	NA	NA	NA	NA	NA	NA	NA	NA	NA	NA	NA	0
Beta-secretase 1	BACE1	single (ELISA)	131	No	0.34 (1.29)	-0.38 (-0.85, 0.08)	0.10125	0.39857	-0.02 (0.93)	0 (-0.35, 0.34)	0.986026	0.990304	-0.21 (0.86)	0.16 (-0.32, 0.64)	0.509932	0.656431	0.99 (1.29)	-1.04 (-1.83, -0.24)	0.0111764	0.768706	NA	NA	NA	NA	NA	NA	NA	NA	NA	NA	NA	NA	NA	NA	NA	NA	0
AXL receptor tyrosine kinase	AXL	single	132	Yes	0.2 (1.04)	-0.23 (-0.65, 0.19)	0.277503	0.688095	-0.12 (1.11)	0.1 (-0.28, 0.48)	0.604941	0.790326	-0.41 (0.74)	0.35 (-0.12, 0.81)	0.143288	0.328481	0.92 (1.51)	-1.01 (-1.82, -0.2)	0.0156186	0.768706	0 (0.92)	-0.02 (-0.42, 0.38)	0.928162	0.985963	0.1 (0.62)	-0.11 (-0.47, 0.24)	0.524717	0.799179	-0.33 (1.05)	0.35 (-0.12, 0.82)	0.145833	0.461448	-0.01 (0.99)	-0.17 (-0.85, 0.51)	0.617665	0.873725	55
Carbonic anhydrase 1	CA1	composite	134	Yes	-0.05 (1.09)	0.05 (-0.37, 0.47)	0.818152	0.967713	0.16 (0.68)	-0.16 (-0.46, 0.14)	0.292254	0.559878	0.04 (1.41)	-0.03 (-0.58, 0.51)	0.90285	0.949751	-0.87 (1.48)	0.85 (0.06, 1.63)	0.0346129	0.768706	-0.07 (0.99)	0.15 (-0.28, 0.57)	0.495693	0.985963	-0.41 (0.57)	0.5 (0.14, 0.87)	0.00722448	0.117037	-0.31 (0.92)	0.41 (-0.07, 0.88)	0.0919905	0.461448	-0.07 (0.95)	0.03 (-0.67, 0.73)	0.939244	0.983777	52
Heparin binding EGF like growth factor	HBEGF	single	135	No	0.22 (0.92)	-0.23 (-0.61, 0.15)	0.23438	0.632827	-0.12 (1.06)	0.09 (-0.27, 0.46)	0.604486	0.790326	-0.28 (1.1)	0.23 (-0.28, 0.73)	0.370717	0.543577	0.64 (0.75)	-0.81 (-1.51, -0.11)	0.0232061	0.768706	NA	NA	NA	NA	NA	NA	NA	NA	NA	NA	NA	NA	NA	NA	NA	NA	0
Beta-secretase 1	BACE1	SIVDSGTTNLR	135	No	0.28 (0.79)	-0.28 (-0.66, 0.1)	0.141787	0.492202	-0.11 (2.34)	0.09 (-0.56, 0.74)	0.791733	0.916148	-0.06 (0.68)	0.06 (-0.41, 0.52)	0.810786	0.891497	0.77 (0.79)	-0.82 (-1.57, -0.06)	0.0337837	0.768706	NA	NA	NA	NA	NA	NA	NA	NA	NA	NA	NA	NA	NA	NA	NA	NA	0
Thioredoxin-dependent peroxide reductase, mitochondrial	PRDX3	HLSVNDLPVGR	136	No	0 (1.34)	0.02 (-0.45, 0.48)	0.942481	0.967713	0.13 (1)	-0.13 (-0.49, 0.23)	0.464575	0.701191	-0.06 (0.38)	0.1 (-0.33, 0.53)	0.641173	0.782939	-0.96 (2.5)	0.97 (0.01, 1.93)	0.047055	0.768706	NA	NA	NA	NA	NA	NA	NA	NA	NA	NA	NA	NA	NA	NA	NA	NA	0
Calsyntenin-3	CLSTN3	composite		No	0.01 (0.71)	-0.03 (-0.38, 0.31)	0.85222	0.967713	-0.05 (0.87)	0.03 (-0.28, 0.35)	0.839786	0.941457	-0.45 (0.72)	0.43 (-0.01, 0.86)	0.0534604	0.163941	0.53 (1.06)	-0.56 (-1.27, 0.16)	0.125058	0.768706	NA	NA	NA	NA	NA	NA	NA	NA	NA	NA	NA	NA	NA	NA	NA	NA	0
Laminin subunit beta-2	LAMB2	AQGIAQGAIR		No	0.1 (1.05)	-0.07 (-0.49, 0.34)	0.733296	0.955875	-0.15 (1.01)	0.12 (-0.23, 0.47)	0.493377	0.707206	-0.47 (1.02)	0.48 (-0.01, 0.96)	0.0537594	0.163941	0.06 (0.66)	-0.14 (-0.87, 0.6)	0.705958	0.828734	NA	NA	NA	NA	NA	NA	NA	NA	NA	NA	NA	NA	NA	NA	NA	NA	0
Cathepsin L1	CTSL	VFQEPLFYEAPR		No	-0.11 (1.39)	0.11 (-0.38, 0.59)	0.656145	0.926995	-0.26 (1.32)	0.25 (-0.17, 0.67)	0.238641	0.55716	-0.55 (1.43)	0.56 (-0.01, 1.13)	0.0539725	0.163941	0.31 (1.63)	-0.33 (-1.16, 0.51)	0.440318	0.804537	NA	NA	NA	NA	NA	NA	NA	NA	NA	NA	NA	NA	NA	NA	NA	NA	0
Chromogranin-A (RBM)	CHGA	single		No	0 (0.89)	-0.03 (-0.4, 0.35)	0.890794	0.967713	-0.11 (0.97)	0.09 (-0.25, 0.43)	0.592138	0.782009	-0.47 (0.92)	0.44 (-0.02, 0.9)	0.0601998	0.1806	0.48 (0.8)	-0.52 (-1.22, 0.19)	0.146602	0.768706	NA	NA	NA	NA	NA	NA	NA	NA	NA	NA	NA	NA	NA	NA	NA	NA	0
Interleukin 6 receptor	IL6R	single		No	0.1 (1.09)	-0.11 (-0.54, 0.32)	0.60647	0.893165	-0.18 (1.12)	0.16 (-0.21, 0.54)	0.392914	0.653959	-0.48 (1)	0.47 (-0.03, 0.98)	0.06409	0.187637	-0.3 (0.93)	0.24 (-0.52, 1)	0.535499	0.804537	NA	NA	NA	NA	NA	NA	NA	NA	NA	NA	NA	NA	NA	NA	NA	NA	0
Superoxide dismutase [Cu-Zn]	SOD1	composite		No	-0.23 (0.99)	0.23 (-0.18, 0.65)	0.268433	0.67947	0.13 (0.98)	-0.14 (-0.49, 0.22)	0.441207	0.687265	-0.43 (0.83)	0.44 (-0.04, 0.92)	0.0714396	0.206665	0.14 (0.89)	-0.18 (-0.94, 0.58)	0.633549	0.804537	NA	NA	NA	NA	NA	NA	NA	NA	NA	NA	NA	NA	NA	NA	NA	NA	0
Interleukin-18-binding protein	IL18BP	single		No	0.03 (1.14)	0.02 (-0.4, 0.44)	0.929345	0.967713	-0.09 (1)	0.06 (-0.29, 0.41)	0.724956	0.872101	-0.4 (0.98)	0.42 (-0.05, 0.89)	0.0821857	0.232477	0.25 (0.7)	-0.31 (-1.04, 0.42)	0.401606	0.804537	NA	NA	NA	NA	NA	NA	NA	NA	NA	NA	NA	NA	NA	NA	NA	NA	0
Beta-2-microglobulin	B2M	composite		No	-0.24 (1.18)	0.29 (-0.1, 0.69)	0.140858	0.492202	-0.19 (1.14)	0.16 (-0.19, 0.5)	0.374526	0.645459	-0.41 (1.12)	0.39 (-0.06, 0.84)	0.0852816	0.233629	0.03 (0.71)	-0.15 (-0.81, 0.51)	0.645257	0.804537	NA	NA	NA	NA	NA	NA	NA	NA	NA	NA	NA	NA	NA	NA	NA	NA	0
Alpha-1-antitrypsin	SERPINA1	LSITGTYDLK		No	0.06 (0.89)	-0.13 (-0.52, 0.27)	0.526403	0.848014	0.08 (1.02)	-0.07 (-0.43, 0.29)	0.689658	0.843241	0.31 (0.35)	-0.37 (-0.8, 0.06)	0.0937456	0.252417	0.35 (0.56)	-0.36 (-1.09, 0.37)	0.331088	0.804537	NA	NA	NA	NA	NA	NA	NA	NA	NA	NA	NA	NA	NA	NA	NA	NA	0
Kallikrein-10	KLK10	ALQLPYR		No	-0.05 (0.74)	0.12 (-0.23, 0.48)	0.490759	0.828156	0 (1)	-0.02 (-0.35, 0.32)	0.921869	0.946155	-0.34 (0.8)	0.38 (-0.07, 0.82)	0.0956012	0.252512	-0.19 (0.9)	0.06 (-0.64, 0.77)	0.854589	0.935429	NA	NA	NA	NA	NA	NA	NA	NA	NA	NA	NA	NA	NA	NA	NA	NA	0
Pancreatic polypeptide	PPY	single		No	-0.18 (0.78)	0.2 (-0.17, 0.58)	0.289624	0.693765	0.05 (1.23)	-0.08 (-0.46, 0.31)	0.689558	0.843241	0.36 (1.07)	-0.4 (-0.9, 0.09)	0.108965	0.281289	-0.65 (1.19)	0.59 (-0.19, 1.36)	0.135625	0.768706	NA	NA	NA	NA	NA	NA	NA	NA	NA	NA	NA	NA	NA	NA	NA	NA	0
Extracellular superoxide dismutase [Cu-Zn]	SOD3	composite		No	0.17 (1.05)	-0.07 (-0.45, 0.31)	0.716092	0.955875	0.22 (0.93)	-0.21 (-0.53, 0.11)	0.193468	0.55716	-0.25 (0.94)	0.33 (-0.09, 0.75)	0.11741	0.287832	0.29 (0.83)	-0.23 (-0.85, 0.4)	0.470954	0.804537	NA	NA	NA	NA	NA	NA	NA	NA	NA	NA	NA	NA	NA	NA	NA	NA	0
Angiotensin converting enzyme	ACE	single		No	0.05 (1.1)	-0.07 (-0.49, 0.36)	0.759184	0.960843	-0.31 (1.15)	0.29 (-0.1, 0.68)	0.13945	0.521329	-0.4 (0.98)	0.4 (-0.1, 0.9)	0.118449	0.287832	0.51 (0.97)	-0.55 (-1.32, 0.22)	0.155797	0.768706	NA	NA	NA	NA	NA	NA	NA	NA	NA	NA	NA	NA	NA	NA	NA	NA	0
Neuroserpin	SERPINI1	composite		No	0.04 (0.97)	-0.11 (-0.51, 0.3)	0.600691	0.890048	-0.18 (1.03)	0.16 (-0.19, 0.52)	0.366922	0.636872	-0.44 (1.06)	0.39 (-0.11, 0.9)	0.123286	0.29662	0.54 (1.15)	-0.54 (-1.31, 0.23)	0.164311	0.768706	NA	NA	NA	NA	NA	NA	NA	NA	NA	NA	NA	NA	NA	NA	NA	NA	0
Immunoglobulin superfamily member 8	IGSF8	composite		No	-0.08 (0.92)	0.11 (-0.28, 0.49)	0.582391	0.888413	-0.21 (0.84)	0.19 (-0.13, 0.5)	0.245868	0.55716	-0.33 (0.84)	0.35 (-0.11, 0.8)	0.134745	0.314838	0.37 (0.96)	-0.43 (-1.16, 0.3)	0.245706	0.771034	NA	NA	NA	NA	NA	NA	NA	NA	NA	NA	NA	NA	NA	NA	NA	NA	0
Alpha synuclein	SNCA	single		No	0.14 (1.02)	-0.14 (-0.56, 0.28)	0.50078	0.839237	0.16 (0.65)	-0.16 (-0.46, 0.14)	0.290725	0.559878	0.41 (1.25)	-0.4 (-0.94, 0.14)	0.140516	0.325194	0.63 (2.43)	-0.6 (-1.55, 0.35)	0.209593	0.771034	NA	NA	NA	NA	NA	NA	NA	NA	NA	NA	NA	NA	NA	NA	NA	NA	0
Neural cell adhesion molecule L1	L1CAM	composite		No	0.15 (1.06)	-0.17 (-0.58, 0.25)	0.426653	0.776886	-0.04 (1.11)	0.02 (-0.35, 0.39)	0.90833	0.946155	-0.35 (0.94)	0.35 (-0.12, 0.82)	0.144866	0.328994	0.56 (1.02)	-0.57 (-1.31, 0.17)	0.126411	0.768706	NA	NA	NA	NA	NA	NA	NA	NA	NA	NA	NA	NA	NA	NA	NA	NA	0
Spondin-1	SPON1	VTLSAAPPSYFR		No	0.09 (1.22)	-0.05 (-0.49, 0.39)	0.835215	0.967713	0.02 (1.06)	-0.04 (-0.4, 0.33)	0.844599	0.941457	-0.33 (1.13)	0.36 (-0.13, 0.86)	0.151233	0.329826	0.14 (1.03)	-0.2 (-0.96, 0.56)	0.599038	0.804537	NA	NA	NA	NA	NA	NA	NA	NA	NA	NA	NA	NA	NA	NA	NA	NA	0
Vasorin	VASN	composite		No	0.14 (1.01)	-0.1 (-0.49, 0.29)	0.622235	0.905408	0.02 (1.03)	-0.05 (-0.39, 0.3)	0.780347	0.911655	-0.33 (1.08)	0.34 (-0.13, 0.8)	0.151548	0.329826	0.02 (0.82)	-0.12 (-0.83, 0.58)	0.725832	0.847968	NA	NA	NA	NA	NA	NA	NA	NA	NA	NA	NA	NA	NA	NA	NA	NA	0
Neural cell adhesion molecule 2	NCAM2	composite		No	-0.01 (1.06)	0.05 (-0.36, 0.45)	0.811117	0.967713	-0.13 (0.91)	0.12 (-0.22, 0.45)	0.494752	0.707206	-0.32 (0.95)	0.34 (-0.13, 0.81)	0.153584	0.329826	0.3 (0.84)	-0.35 (-1.08, 0.37)	0.334576	0.804537	NA	NA	NA	NA	NA	NA	NA	NA	NA	NA	NA	NA	NA	NA	NA	NA	0
Leucine-rich repeat-containing protein 4B	LRRC4B	composite		No	0.26 (1.01)	-0.28 (-0.69, 0.12)	0.164315	0.539576	-0.07 (1.22)	0.06 (-0.33, 0.45)	0.757734	0.893832	-0.38 (1.05)	0.35 (-0.14, 0.84)	0.154315	0.329826	0.37 (1.48)	-0.39 (-1.18, 0.4)	0.324533	0.804537	NA	NA	NA	NA	NA	NA	NA	NA	NA	NA	NA	NA	NA	NA	NA	NA	0
Apolipoprotein E	APOE	composite		No	0.21 (1.07)	-0.18 (-0.58, 0.21)	0.357708	0.703829	-0.03 (1.17)	0.03 (-0.35, 0.4)	0.884376	0.942559	-0.29 (0.93)	0.32 (-0.12, 0.76)	0.155858	0.329826	0.09 (0.85)	-0.08 (-0.76, 0.6)	0.809962	0.9284	NA	NA	NA	NA	NA	NA	NA	NA	NA	NA	NA	NA	NA	NA	NA	NA	0
T lymphocyte secreted protein I309	CCL1	composite		No	0.19 (0.62)	-0.17 (-0.53, 0.18)	0.341068	0.703829	0.19 (0.92)	-0.21 (-0.55, 0.13)	0.224348	0.55716	0.36 (1.3)	-0.39 (-0.93, 0.16)	0.164513	0.333399	-0.13 (0.67)	0.06 (-0.68, 0.79)	0.875557	0.948789	NA	NA	NA	NA	NA	NA	NA	NA	NA	NA	NA	NA	NA	NA	NA	NA	0
Beta-Ala-His dipeptidase	CNDP1	composite		No	-0.02 (0.94)	0.04 (-0.36, 0.43)	0.857298	0.967713	-0.31 (0.84)	0.29 (-0.03, 0.62)	0.0744392	0.468779	-0.29 (0.92)	0.33 (-0.14, 0.8)	0.16468	0.333399	0.33 (0.89)	-0.37 (-1.1, 0.37)	0.324115	0.804537	NA	NA	NA	NA	NA	NA	NA	NA	NA	NA	NA	NA	NA	NA	NA	NA	0
Peroxiredoxin-2	PRDX2	composite		No	0.22 (1.05)	-0.23 (-0.65, 0.2)	0.291856	0.693765	0.16 (0.82)	-0.16 (-0.48, 0.17)	0.348253	0.626856	0.37 (1.14)	-0.37 (-0.89, 0.16)	0.166013	0.333399	0.16 (1.64)	-0.17 (-1.01, 0.67)	0.685046	0.81203	NA	NA	NA	NA	NA	NA	NA	NA	NA	NA	NA	NA	NA	NA	NA	NA	0
Ectonucleotide pyrophosphatase phosphodiesterase family member 2	ENPP2	composite		No	0.15 (0.7)	-0.18 (-0.52, 0.17)	0.308223	0.703829	0.26 (0.73)	-0.25 (-0.54, 0.04)	0.0948169	0.475723	-0.31 (1.04)	0.32 (-0.14, 0.78)	0.172674	0.338512	-0.22 (0.65)	0.2 (-0.47, 0.87)	0.545147	0.804537	NA	NA	NA	NA	NA	NA	NA	NA	NA	NA	NA	NA	NA	NA	NA	NA	0
SLIT and NTRK-like protein 1	SLITRK1	SLPVDVFAGVSLSK		No	-0.05 (1.21)	0.1 (-0.34, 0.55)	0.643861	0.916754	-0.1 (1.29)	0.08 (-0.33, 0.5)	0.690556	0.843241	-0.37 (1.46)	0.39 (-0.18, 0.96)	0.173391	0.338512	0.25 (0.34)	-0.29 (-1.03, 0.44)	0.42694	0.804537	NA	NA	NA	NA	NA	NA	NA	NA	NA	NA	NA	NA	NA	NA	NA	NA	0
Monocyte chemotactic protein 2	CCL8	single		No	-0.09 (0.82)	0.15 (-0.23, 0.53)	0.424022	0.776886	-0.12 (0.87)	0.12 (-0.22, 0.46)	0.48031	0.707206	-0.27 (0.8)	0.31 (-0.14, 0.77)	0.174132	0.338512	-0.03 (1.21)	-0.07 (-0.81, 0.67)	0.848721	0.933209	NA	NA	NA	NA	NA	NA	NA	NA	NA	NA	NA	NA	NA	NA	NA	NA	0
Papilin	PAPLN	VHQSPDGTLLIYNLR		No	-0.13 (1.13)	0.2 (-0.22, 0.62)	0.349497	0.703829	0.08 (0.94)	-0.1 (-0.43, 0.24)	0.562801	0.759781	-0.31 (1.28)	0.35 (-0.16, 0.87)	0.176864	0.341096	0.27 (0.84)	-0.31 (-1.04, 0.43)	0.408176	0.804537	NA	NA	NA	NA	NA	NA	NA	NA	NA	NA	NA	NA	NA	NA	NA	NA	0
Cancer antigen 199		single		No	-0.15 (0.69)	0.18 (-0.19, 0.55)	0.338345	0.703829	-0.04 (0.72)	0.04 (-0.27, 0.35)	0.78418	0.91175	-0.28 (0.75)	0.32 (-0.15, 0.79)	0.182406	0.346287	0.43 (0.7)	-0.42 (-1.16, 0.32)	0.258757	0.771034	NA	NA	NA	NA	NA	NA	NA	NA	NA	NA	NA	NA	NA	NA	NA	NA	0
Contactin-2	CNTN2	composite		No	0.06 (1)	-0.02 (-0.43, 0.38)	0.904567	0.967713	-0.01 (1)	0 (-0.35, 0.34)	0.987633	0.990304	-0.27 (1.22)	0.33 (-0.16, 0.83)	0.184722	0.347964	0.04 (1.51)	-0.08 (-0.87, 0.71)	0.835179	0.930956	NA	NA	NA	NA	NA	NA	NA	NA	NA	NA	NA	NA	NA	NA	NA	NA	0
Amyloid beta A4 protein	APP	composite		No	0.25 (0.95)	-0.24 (-0.64, 0.16)	0.233732	0.632827	0.05 (0.95)	-0.06 (-0.4, 0.29)	0.739388	0.880742	-0.31 (0.92)	0.32 (-0.16, 0.8)	0.18781	0.350798	0.48 (1.24)	-0.52 (-1.3, 0.25)	0.181046	0.768706	NA	NA	NA	NA	NA	NA	NA	NA	NA	NA	NA	NA	NA	NA	NA	NA	0
Interleukin 16	IL16	single		No	-0.22 (0.77)	0.28 (-0.09, 0.64)	0.141195	0.492202	-0.2 (0.83)	0.18 (-0.13, 0.5)	0.25315	0.55716	-0.27 (0.68)	0.29 (-0.16, 0.73)	0.199922	0.358292	-0.34 (0.93)	0.28 (-0.46, 1.01)	0.456471	0.804537	NA	NA	NA	NA	NA	NA	NA	NA	NA	NA	NA	NA	NA	NA	NA	NA	0
Apolipoprotein CIII	APOC3	single		No	-0.22 (0.81)	0.24 (-0.15, 0.63)	0.218506	0.620697	-0.21 (0.73)	0.2 (-0.11, 0.51)	0.204015	0.55716	-0.24 (0.65)	0.3 (-0.16, 0.75)	0.200525	0.358292	-0.03 (0.72)	0.08 (-0.66, 0.83)	0.822721	0.929367	NA	NA	NA	NA	NA	NA	NA	NA	NA	NA	NA	NA	NA	NA	NA	NA	0
Cortisol		single		No	0.1 (1.12)	-0.04 (-0.46, 0.38)	0.847664	0.967713	0.05 (1.19)	-0.08 (-0.46, 0.29)	0.667061	0.839875	-0.31 (0.91)	0.31 (-0.17, 0.79)	0.204349	0.362458	-0.39 (1.13)	0.27 (-0.48, 1.01)	0.474407	0.804537	NA	NA	NA	NA	NA	NA	NA	NA	NA	NA	NA	NA	NA	NA	NA	NA	0
Amyloid-like protein 2	APLP2	composite		No	0.15 (0.85)	-0.14 (-0.52, 0.24)	0.471228	0.817916	-0.01 (1.04)	0 (-0.36, 0.36)	0.990304	0.990304	-0.25 (0.72)	0.27 (-0.18, 0.72)	0.233468	0.405234	0.31 (0.88)	-0.34 (-1.07, 0.4)	0.3623	0.804537	NA	NA	NA	NA	NA	NA	NA	NA	NA	NA	NA	NA	NA	NA	NA	NA	0
Insulin-like growth factor-binding protein 2	IGFBP2	composite		No	-0.08 (0.87)	0.17 (-0.18, 0.51)	0.339457	0.703829	-0.13 (0.76)	0.11 (-0.16, 0.39)	0.416633	0.662134	-0.19 (0.99)	0.24 (-0.16, 0.65)	0.237194	0.405902	-0.39 (0.57)	0.31 (-0.29, 0.91)	0.308205	0.804537	NA	NA	NA	NA	NA	NA	NA	NA	NA	NA	NA	NA	NA	NA	NA	NA	0
Apolipoprotein D	APOD	single (RBM)		No	0.1 (0.96)	0.01 (-0.36, 0.39)	0.938995	0.967713	0.23 (1.14)	-0.25 (-0.6, 0.1)	0.164636	0.55716	0.35 (1.23)	-0.29 (-0.77, 0.2)	0.242869	0.412707	0.55 (0.97)	-0.61 (-1.32, 0.1)	0.0916619	0.768706	NA	NA	NA	NA	NA	NA	NA	NA	NA	NA	NA	NA	NA	NA	NA	NA	0
Catalase	CAT	LFAYPDTHR		No	-0.42 (2.56)	0.37 (-0.38, 1.11)	0.32855	0.703829	-0.02 (1.07)	0.03 (-0.34, 0.4)	0.873777	0.942559	0.33 (1.29)	-0.32 (-0.86, 0.23)	0.248135	0.418727	-0.14 (1.51)	0.19 (-0.63, 1.01)	0.638525	0.804537	NA	NA	NA	NA	NA	NA	NA	NA	NA	NA	NA	NA	NA	NA	NA	NA	0
Prolactin	PRL	single		No	-0.04 (1.02)	0.04 (-0.38, 0.46)	0.852893	0.967713	0.26 (1.2)	-0.26 (-0.66, 0.14)	0.199357	0.55716	0.32 (1.22)	-0.31 (-0.84, 0.23)	0.254163	0.423025	-0.26 (0.87)	0.29 (-0.48, 1.05)	0.457619	0.804537	NA	NA	NA	NA	NA	NA	NA	NA	NA	NA	NA	NA	NA	NA	NA	NA	0
Transforming growth factor beta-1	TGFA	LLAPSDSPEWLSFDVTGVVR		No	0.18 (0.78)	-0.22 (-0.59, 0.16)	0.258025	0.667022	-0.3 (1.34)	0.27 (-0.15, 0.69)	0.199986	0.55716	-0.41 (1.53)	0.33 (-0.25, 0.91)	0.258068	0.426602	0.55 (0.72)	-0.65 (-1.38, 0.09)	0.0826708	0.768706	NA	NA	NA	NA	NA	NA	NA	NA	NA	NA	NA	NA	NA	NA	NA	NA	0
Di-N-acetylchitobiase	CTBS	ATYIQNYR		No	-0.06 (0.89)	0.11 (-0.28, 0.5)	0.584963	0.888413	0.11 (0.9)	-0.12 (-0.45, 0.22)	0.493323	0.707206	-0.24 (1.28)	0.3 (-0.23, 0.83)	0.263627	0.429941	0.17 (0.7)	-0.18 (-0.93, 0.56)	0.62698	0.804537	NA	NA	NA	NA	NA	NA	NA	NA	NA	NA	NA	NA	NA	NA	NA	NA	0
Myelin-oligodendrocyte glycoprotein	MOG	VVHLYR		No	0.1 (1.03)	-0.09 (-0.5, 0.32)	0.670708	0.932751	-0.07 (1.03)	0.04 (-0.31, 0.4)	0.804232	0.926201	-0.29 (1.05)	0.28 (-0.22, 0.77)	0.267468	0.433299	0.39 (0.87)	-0.47 (-1.21, 0.28)	0.216427	0.771034	NA	NA	NA	NA	NA	NA	NA	NA	NA	NA	NA	NA	NA	NA	NA	NA	0
SexHormoneBindingGlobulinSHBGnmolL	SHBG	single		No	-0.15 (0.88)	0.15 (-0.25, 0.55)	0.458338	0.807073	-0.2 (0.76)	0.18 (-0.13, 0.5)	0.254304	0.55716	-0.25 (0.66)	0.25 (-0.21, 0.71)	0.281746	0.453407	-0.73 (1)	0.75 (-0.02, 1.52)	0.0564502	0.768706	NA	NA	NA	NA	NA	NA	NA	NA	NA	NA	NA	NA	NA	NA	NA	NA	0
Superoxide dismutase [Cu-Zn]	SOD1	HVGDLGNVTADK		No	0.21 (0.91)	-0.25 (-0.64, 0.14)	0.211289	0.620697	0.09 (1.02)	-0.11 (-0.47, 0.24)	0.526208	0.718363	-0.28 (0.79)	0.25 (-0.21, 0.72)	0.285863	0.454018	0.44 (0.92)	-0.5 (-1.25, 0.24)	0.180486	0.768706	NA	NA	NA	NA	NA	NA	NA	NA	NA	NA	NA	NA	NA	NA	NA	NA	0
Contactin-associated protein-like 2	CNTNAP2	YSSSDWVTQYR		No	0.2 (1.1)	-0.25 (-0.68, 0.19)	0.260882	0.667308	0.07 (1.09)	-0.08 (-0.45, 0.29)	0.670825	0.840261	-0.29 (0.9)	0.25 (-0.23, 0.74)	0.303242	0.475405	0.7 (1.13)	-0.72 (-1.5, 0.06)	0.0715001	0.768706	NA	NA	NA	NA	NA	NA	NA	NA	NA	NA	NA	NA	NA	NA	NA	NA	0
Alpha2MacroglobulinA2MacromgmL	A2M	single		No	-0.18 (0.98)	0.22 (-0.15, 0.6)	0.242553	0.640658	-0.13 (1.18)	0.09 (-0.28, 0.46)	0.635561	0.809357	-0.27 (1.06)	0.25 (-0.23, 0.74)	0.305362	0.47566	0.15 (0.73)	-0.3 (-1.01, 0.41)	0.405023	0.804537	NA	NA	NA	NA	NA	NA	NA	NA	NA	NA	NA	NA	NA	NA	NA	NA	0
Chemokine CC4H CC4ngmL	CCL16	single		No	-0.07 (0.59)	0.13 (-0.22, 0.48)	0.461839	0.807388	-0.17 (0.76)	0.18 (-0.13, 0.49)	0.240766	0.55716	-0.13 (0.62)	0.22 (-0.22, 0.67)	0.326759	0.505748	-0.09 (0.57)	0.21 (-0.49, 0.92)	0.546621	0.804537	NA	NA	NA	NA	NA	NA	NA	NA	NA	NA	NA	NA	NA	NA	NA	NA	0
Polyubiquitin-B	UBB	composite		No	0.01 (0.96)	-0.02 (-0.42, 0.38)	0.907539	0.967713	0.08 (0.93)	-0.1 (-0.44, 0.24)	0.575867	0.773081	-0.24 (0.92)	0.24 (-0.25, 0.72)	0.337489	0.519049	0.17 (0.76)	-0.25 (-0.99, 0.48)	0.494624	0.804537	NA	NA	NA	NA	NA	NA	NA	NA	NA	NA	NA	NA	NA	NA	NA	NA	0
Kallikrein-6	KLK6	composite		No	0.06 (0.88)	-0.06 (-0.43, 0.3)	0.731778	0.955875	-0.04 (0.82)	0.03 (-0.28, 0.34)	0.87095	0.942559	-0.23 (0.97)	0.22 (-0.24, 0.69)	0.342736	0.523804	0.49 (0.87)	-0.56 (-1.26, 0.14)	0.116414	0.768706	NA	NA	NA	NA	NA	NA	NA	NA	NA	NA	NA	NA	NA	NA	NA	NA	0
Angiopoietin2ANG2ngmL	ANGPT2	single		No	-0.02 (1.08)	0.11 (-0.3, 0.53)	0.596911	0.889873	-0.05 (1.11)	0.04 (-0.33, 0.41)	0.841211	0.941457	-0.15 (0.73)	0.21 (-0.23, 0.66)	0.344961	0.52391	0.08 (0.95)	-0.11 (-0.85, 0.64)	0.77823	0.904832	NA	NA	NA	NA	NA	NA	NA	NA	NA	NA	NA	NA	NA	NA	NA	NA	0
Intercellular adhesion Molecule 1	ICAM1	single		No	-0.21 (0.85)	0.29 (-0.08, 0.67)	0.124934	0.467061	-0.22 (0.87)	0.21 (-0.11, 0.53)	0.202785	0.55716	-0.14 (0.95)	0.22 (-0.24, 0.68)	0.348835	0.526502	-0.48 (1.08)	0.5 (-0.25, 1.26)	0.186512	0.768706	NA	NA	NA	NA	NA	NA	NA	NA	NA	NA	NA	NA	NA	NA	NA	NA	0
Brain acid soluble protein 1	BASP1	ETPAATEAPSSTPK		No	0.16 (0.33)	-0.11 (-0.44, 0.22)	0.526955	0.848014	0.23 (0.38)	-0.23 (-0.5, 0.04)	0.0967326	0.475723	0.24 (0.39)	-0.2 (-0.64, 0.23)	0.35644	0.53466	-0.03 (0.24)	0.03 (-0.69, 0.75)	0.93333	0.981814	NA	NA	NA	NA	NA	NA	NA	NA	NA	NA	NA	NA	NA	NA	NA	NA	0
Transthyretin	TTR	composite		No	0.02 (0.59)	0.01 (-0.32, 0.34)	0.957762	0.967713	0.21 (0.65)	-0.21 (-0.5, 0.07)	0.136312	0.517559	-0.2 (0.75)	0.2 (-0.24, 0.64)	0.370141	0.543577	-0.26 (0.74)	0.2 (-0.48, 0.89)	0.556191	0.804537	NA	NA	NA	NA	NA	NA	NA	NA	NA	NA	NA	NA	NA	NA	NA	NA	0
Complement C4-A	C4A	composite		No	-0.09 (0.89)	0.16 (-0.21, 0.53)	0.392918	0.734454	-0.17 (0.96)	0.14 (-0.18, 0.46)	0.38263	0.653846	-0.22 (0.99)	0.21 (-0.26, 0.68)	0.37417	0.544451	-0.3 (1.08)	0.22 (-0.53, 0.96)	0.562808	0.804537	NA	NA	NA	NA	NA	NA	NA	NA	NA	NA	NA	NA	NA	NA	NA	NA	0
MatrixMetalloproteinase2MMP2ngmL	MMP2	single		No	-0.28 (0.95)	0.31 (-0.09, 0.72)	0.124466	0.467061	-0.18 (1.21)	0.17 (-0.23, 0.56)	0.401397	0.6573	-0.26 (1.05)	0.22 (-0.28, 0.72)	0.388206	0.55255	0.46 (0.7)	-0.54 (-1.28, 0.2)	0.150812	0.768706	NA	NA	NA	NA	NA	NA	NA	NA	NA	NA	NA	NA	NA	NA	NA	NA	0
MatrixMetalloproteinase3MMP3ngmL	MMP3	single		No	-0.04 (1.12)	0.13 (-0.3, 0.55)	0.550766	0.869066	0.02 (1.05)	-0.03 (-0.39, 0.33)	0.882196	0.942559	0.28 (0.88)	-0.2 (-0.65, 0.26)	0.388832	0.55255	0.59 (0.88)	-0.57 (-1.29, 0.14)	0.114531	0.768706	NA	NA	NA	NA	NA	NA	NA	NA	NA	NA	NA	NA	NA	NA	NA	NA	0
MonocyteChemotacticProtein1MCP1pgmL	CCL2	single		No	0.02 (0.91)	0.08 (-0.3, 0.45)	0.683804	0.938804	-0.21 (0.98)	0.19 (-0.15, 0.54)	0.263676	0.55716	0.21 (1.01)	-0.21 (-0.68, 0.27)	0.395212	0.557985	0.05 (0.79)	-0.16 (-0.89, 0.56)	0.652113	0.804537	NA	NA	NA	NA	NA	NA	NA	NA	NA	NA	NA	NA	NA	NA	NA	NA	0
Contactin-associated protein-like 2	CNTNAP2	HELQHPIIAR		No	0.31 (1.02)	-0.39 (-0.8, 0.02)	0.0652265	0.301658	0.05 (1.19)	-0.06 (-0.44, 0.33)	0.765101	0.898162	-0.24 (1.02)	0.22 (-0.29, 0.72)	0.397248	0.557985	0.31 (1.26)	-0.29 (-1.07, 0.5)	0.470908	0.804537	NA	NA	NA	NA	NA	NA	NA	NA	NA	NA	NA	NA	NA	NA	NA	NA	0
LectinLikeOxidizedLDLReceptor1LOXngmL	OLR1	single		No	0.23 (0.92)	-0.23 (-0.62, 0.16)	0.248259	0.648677	0.09 (1.11)	-0.13 (-0.49, 0.24)	0.494421	0.707206	-0.23 (0.69)	0.19 (-0.26, 0.64)	0.401359	0.560519	0.36 (0.67)	-0.46 (-1.19, 0.28)	0.21882	0.771034	NA	NA	NA	NA	NA	NA	NA	NA	NA	NA	NA	NA	NA	NA	NA	NA	0
PregnancyAssociatedPlasmaProteinAPmIUmL	PAPPA	single		No	0.32 (0.9)	-0.23 (-0.62, 0.16)	0.242081	0.640658	-0.01 (1.21)	0.02 (-0.37, 0.41)	0.926584	0.946155	-0.13 (0.99)	0.2 (-0.28, 0.69)	0.409691	0.562457	0.02 (0.88)	0.01 (-0.71, 0.74)	0.970096	0.997242	NA	NA	NA	NA	NA	NA	NA	NA	NA	NA	NA	NA	NA	NA	NA	NA	0
Soluble Amyloid beta A4 protein (s-APP beta)	APP	single		No	0.05 (0.84)	-0.1 (-0.48, 0.28)	0.611435	0.895052	0.08 (1.26)	-0.06 (-0.46, 0.33)	0.748236	0.886933	-0.19 (0.98)	0.19 (-0.29, 0.67)	0.442485	0.600692	0.73 (1.13)	-0.61 (-1.36, 0.13)	0.105102	0.768706	NA	NA	NA	NA	NA	NA	NA	NA	NA	NA	NA	NA	NA	NA	NA	NA	0
Hemoglobin subunit beta	HBB	composite		No	0.01 (1.03)	-0.03 (-0.44, 0.39)	0.894834	0.967713	0.08 (0.98)	-0.07 (-0.42, 0.28)	0.687038	0.843241	0.18 (1.2)	-0.19 (-0.71, 0.33)	0.466724	0.626597	-0.45 (1.28)	0.45 (-0.33, 1.22)	0.253683	0.771034	NA	NA	NA	NA	NA	NA	NA	NA	NA	NA	NA	NA	NA	NA	NA	NA	0
Peroxiredoxin-1	PRDX1	composite		No	0.25 (1.05)	-0.22 (-0.63, 0.19)	0.290225	0.693765	0.18 (1.01)	-0.19 (-0.54, 0.17)	0.293898	0.559878	0.18 (0.8)	-0.16 (-0.62, 0.3)	0.49113	0.653143	0.52 (1.2)	-0.56 (-1.32, 0.21)	0.150446	0.768706	NA	NA	NA	NA	NA	NA	NA	NA	NA	NA	NA	NA	NA	NA	NA	NA	0
Complement component C8 beta chain	C8B	composite		No	-0.14 (0.59)	0.23 (-0.09, 0.56)	0.154088	0.527372	0.03 (0.57)	-0.03 (-0.29, 0.23)	0.8196	0.930667	-0.05 (0.65)	0.14 (-0.27, 0.55)	0.495234	0.653143	0.02 (0.59)	0 (-0.67, 0.66)	0.991229	0.997242	NA	NA	NA	NA	NA	NA	NA	NA	NA	NA	NA	NA	NA	NA	NA	NA	0
Latent-transforming growth factor beta-binding protein 2	LTBP2	EQDAPVAGLQPVER		No	-0.27 (1.11)	0.27 (-0.14, 0.68)	0.197384	0.620697	-0.22 (1.02)	0.19 (-0.15, 0.53)	0.278851	0.559878	-0.23 (0.85)	0.16 (-0.3, 0.62)	0.496165	0.653143	-0.61 (0.6)	0.48 (-0.23, 1.2)	0.18427	0.768706	NA	NA	NA	NA	NA	NA	NA	NA	NA	NA	NA	NA	NA	NA	NA	NA	0
Glutamate receptor 4	GRM4	EYPGSETPPK		No	0.17 (0.81)	-0.21 (-0.59, 0.18)	0.294065	0.693765	-0.03 (0.98)	0.03 (-0.33, 0.38)	0.880339	0.942559	-0.24 (1.17)	0.18 (-0.35, 0.7)	0.503353	0.656431	0.01 (0.41)	-0.04 (-0.78, 0.69)	0.911016	0.966712	NA	NA	NA	NA	NA	NA	NA	NA	NA	NA	NA	NA	NA	NA	NA	NA	0
Kallikrein-11	KLK11	LPHTLR		No	0.15 (0.9)	-0.11 (-0.51, 0.29)	0.594751	0.889873	0.34 (1.07)	-0.33 (-0.7, 0.04)	0.0820129	0.468779	-0.12 (0.96)	0.16 (-0.33, 0.65)	0.510305	0.656431	-0.23 (0.82)	0.18 (-0.55, 0.92)	0.617608	0.804537	NA	NA	NA	NA	NA	NA	NA	NA	NA	NA	NA	NA	NA	NA	NA	NA	0
Apolipoprotein B-100	APOB	TGISPLALIK		No	0.22 (0.44)	-0.16 (-0.5, 0.17)	0.331898	0.703829	0.26 (0.42)	-0.26 (-0.53, 0)	0.0516329	0.445953	0.2 (0.88)	-0.16 (-0.62, 0.31)	0.510557	0.656431	0.19 (0.37)	-0.23 (-0.95, 0.5)	0.534782	0.804537	NA	NA	NA	NA	NA	NA	NA	NA	NA	NA	NA	NA	NA	NA	NA	NA	0
Placenta growth factor	PGF	single		No	-0.01 (0.68)	0.13 (-0.21, 0.47)	0.452838	0.803209	-0.14 (0.76)	0.12 (-0.16, 0.41)	0.396052	0.654698	-0.07 (0.77)	0.14 (-0.29, 0.56)	0.523434	0.669444	-0.06 (1.03)	-0.02 (-0.7, 0.66)	0.950825	0.988499	NA	NA	NA	NA	NA	NA	NA	NA	NA	NA	NA	NA	NA	NA	NA	NA	0
Follicle stimulating hormone	FSHB	single		No	-0.19 (1.03)	0.02 (-0.35, 0.4)	0.903294	0.967713	-0.11 (0.94)	0.1 (-0.18, 0.38)	0.487176	0.707206	-0.02 (0.88)	-0.13 (-0.54, 0.28)	0.529558	0.673731	0.2 (0.94)	-0.17 (-0.83, 0.49)	0.600877	0.804537	NA	NA	NA	NA	NA	NA	NA	NA	NA	NA	NA	NA	NA	NA	NA	NA	0
Hemoglobin subunit alpha	HBA1	composite		No	-0.04 (1.14)	0.02 (-0.41, 0.45)	0.928321	0.967713	0.03 (1.03)	-0.02 (-0.38, 0.34)	0.89344	0.946155	0.14 (1.25)	-0.17 (-0.7, 0.36)	0.533825	0.674159	-0.21 (1.34)	0.2 (-0.59, 0.98)	0.615271	0.804537	NA	NA	NA	NA	NA	NA	NA	NA	NA	NA	NA	NA	NA	NA	NA	NA	0
Vascular cell adhesion molecule 1	VCAM1	single		No	-0.09 (1.14)	0.19 (-0.22, 0.59)	0.361432	0.703829	-0.11 (1.13)	0.08 (-0.27, 0.44)	0.637956	0.809357	-0.1 (1.04)	0.15 (-0.32, 0.61)	0.535444	0.674159	0.13 (0.8)	-0.18 (-0.88, 0.51)	0.598886	0.804537	NA	NA	NA	NA	NA	NA	NA	NA	NA	NA	NA	NA	NA	NA	NA	NA	0
Fas ligand	FASLG	single		No	-0.02 (1.36)	0.1 (-0.37, 0.57)	0.667859	0.932751	-0.03 (1.2)	0.03 (-0.35, 0.42)	0.871806	0.942559	-0.1 (0.9)	0.15 (-0.34, 0.63)	0.550334	0.689336	-0.21 (1.38)	0.21 (-0.59, 1)	0.605792	0.804537	NA	NA	NA	NA	NA	NA	NA	NA	NA	NA	NA	NA	NA	NA	NA	NA	0
Gamma-enolase	ENO2	LGAEVYHTLK		No	0.29 (0.88)	-0.28 (-0.67, 0.11)	0.16304	0.539576	0.27 (0.93)	-0.28 (-0.63, 0.07)	0.113775	0.493698	0.14 (0.58)	-0.13 (-0.57, 0.31)	0.56218	0.700563	-1.62 (5.63)	1.53 (-0.04, 3.09)	0.0557419	0.768706	NA	NA	NA	NA	NA	NA	NA	NA	NA	NA	NA	NA	NA	NA	NA	NA	0
Fibrinogen	FGA	single		No	0.22 (0.87)	-0.12 (-0.5, 0.26)	0.521488	0.848014	0.19 (1.19)	-0.22 (-0.59, 0.16)	0.2601	0.55716	0.17 (1.04)	-0.13 (-0.62, 0.36)	0.606261	0.744047	0.2 (1.15)	-0.24 (-1.01, 0.52)	0.527676	0.804537	NA	NA	NA	NA	NA	NA	NA	NA	NA	NA	NA	NA	NA	NA	NA	NA	0
Transforming growth factor alpha	TGFB1	single		No	0.05 (0.87)	-0.02 (-0.42, 0.37)	0.914298	0.967713	0.32 (1.16)	-0.31 (-0.71, 0.08)	0.114896	0.493698	-0.03 (0.83)	0.11 (-0.36, 0.58)	0.646003	0.784894	0.67 (1.48)	-0.6 (-1.41, 0.21)	0.144995	0.768706	NA	NA	NA	NA	NA	NA	NA	NA	NA	NA	NA	NA	NA	NA	NA	NA	0
Tissue factor	F3	single		No	0.39 (0.95)	-0.35 (-0.75, 0.05)	0.0842819	0.348726	-0.05 (1.08)	0.03 (-0.34, 0.4)	0.868996	0.942559	-0.09 (0.72)	0.1 (-0.35, 0.56)	0.652273	0.788568	0.43 (0.97)	-0.49 (-1.24, 0.27)	0.202546	0.771034	NA	NA	NA	NA	NA	NA	NA	NA	NA	NA	NA	NA	NA	NA	NA	NA	0
Melanotransferrin	MELTF	ADTDGGLIFR		No	-0.27 (1.15)	0.2 (-0.24, 0.63)	0.37372	0.713407	-0.2 (0.9)	0.19 (-0.15, 0.53)	0.271621	0.559878	-0.17 (0.9)	0.11 (-0.37, 0.59)	0.65884	0.789586	-0.25 (1.3)	0.22 (-0.57, 1)	0.580239	0.804537	NA	NA	NA	NA	NA	NA	NA	NA	NA	NA	NA	NA	NA	NA	NA	NA	0
Apolipoprotein B-100	APOB	SVSLPSLDPASAK		No	0.1 (0.37)	-0.1 (-0.44, 0.23)	0.537842	0.854219	0.2 (0.34)	-0.21 (-0.48, 0.06)	0.11932	0.493698	0.1 (1.1)	-0.11 (-0.63, 0.4)	0.661848	0.789586	0.31 (0.57)	-0.32 (-1.06, 0.42)	0.391166	0.804537	NA	NA	NA	NA	NA	NA	NA	NA	NA	NA	NA	NA	NA	NA	NA	NA	0
Plasminogen activator inhibitor 1	SERPINE1	single		No	-0.01 (1)	0.08 (-0.31, 0.47)	0.68382	0.938804	0 (0.9)	-0.01 (-0.34, 0.32)	0.945301	0.957117	0.09 (1.16)	-0.1 (-0.6, 0.4)	0.687197	0.810626	0.53 (1.28)	-0.61 (-1.39, 0.17)	0.12073	0.768706	NA	NA	NA	NA	NA	NA	NA	NA	NA	NA	NA	NA	NA	NA	NA	NA	0
Interleukin 25	IL25	single		No	-0.12 (0.85)	0.18 (-0.2, 0.56)	0.360742	0.703829	0.09 (0.92)	-0.11 (-0.44, 0.22)	0.498362	0.707206	-0.09 (0.89)	0.08 (-0.37, 0.54)	0.716212	0.836728	0.24 (0.88)	-0.37 (-1.08, 0.35)	0.307615	0.804537	NA	NA	NA	NA	NA	NA	NA	NA	NA	NA	NA	NA	NA	NA	NA	NA	0
Stem cell factor	KITLG	single		No	-0.2 (0.89)	0.24 (-0.15, 0.63)	0.221224	0.620697	-0.13 (0.85)	0.12 (-0.21, 0.45)	0.45964	0.701191	0.1 (0.66)	-0.08 (-0.54, 0.38)	0.726207	0.844346	0.3 (0.85)	-0.3 (-1.06, 0.46)	0.430236	0.804537	NA	NA	NA	NA	NA	NA	NA	NA	NA	NA	NA	NA	NA	NA	NA	NA	0
Neutrophil gelatinase associated lipocal	LCN2	single		No	-0.03 (1)	0.19 (-0.18, 0.55)	0.311239	0.703829	-0.1 (0.97)	0.08 (-0.23, 0.39)	0.611801	0.795014	0 (0.94)	0.07 (-0.37, 0.52)	0.741881	0.853523	-0.48 (1.34)	0.41 (-0.32, 1.15)	0.26653	0.771034	NA	NA	NA	NA	NA	NA	NA	NA	NA	NA	NA	NA	NA	NA	NA	NA	0
Complement C3	C3	VPVAVQGEDTVQSLTQGDGVAK		No	-0.42 (1.53)	0.45 (-0.06, 0.96)	0.0859407	0.348726	-0.27 (1.29)	0.25 (-0.16, 0.67)	0.225009	0.55716	-0.12 (1.15)	0.09 (-0.44, 0.61)	0.744637	0.853523	-0.02 (0.2)	-0.01 (-0.74, 0.73)	0.98504	0.997242	NA	NA	NA	NA	NA	NA	NA	NA	NA	NA	NA	NA	NA	NA	NA	NA	0
Peroxiredoxin-6	PRDX6	composite		No	0.14 (0.87)	-0.13 (-0.48, 0.23)	0.478377	0.822673	0.1 (0.65)	-0.11 (-0.38, 0.16)	0.43406	0.680494	0.08 (0.75)	-0.06 (-0.47, 0.35)	0.761823	0.869122	0.21 (1.13)	-0.21 (-0.89, 0.47)	0.54076	0.804537	NA	NA	NA	NA	NA	NA	NA	NA	NA	NA	NA	NA	NA	NA	NA	NA	0
Sialate O-acetylesterase	SIAE	ELSNTAAYQSVR		No	0.18 (0.85)	-0.19 (-0.59, 0.2)	0.332288	0.703829	0.07 (0.94)	-0.06 (-0.4, 0.28)	0.72156	0.872101	0.02 (0.67)	-0.07 (-0.53, 0.39)	0.77514	0.877315	-0.04 (0.98)	0.06 (-0.7, 0.82)	0.874609	0.948789	NA	NA	NA	NA	NA	NA	NA	NA	NA	NA	NA	NA	NA	NA	NA	NA	0
Macrophage colony stimulating factor 1	CSF1	single		No	0.09 (0.99)	-0.05 (-0.45, 0.34)	0.795541	0.967713	-0.21 (1.1)	0.2 (-0.17, 0.58)	0.286694	0.559878	-0.04 (0.72)	0.06 (-0.4, 0.52)	0.781688	0.879399	0.25 (1.06)	-0.32 (-1.08, 0.44)	0.401257	0.804537	NA	NA	NA	NA	NA	NA	NA	NA	NA	NA	NA	NA	NA	NA	NA	NA	0
Isoprostaan		single		No	-0.15 (0.9)	0.16 (-0.19, 0.51)	0.372899	0.713407	-0.16 (0.82)	0.17 (-0.13, 0.47)	0.262454	0.55716	-0.06 (1.13)	0.06 (-0.4, 0.51)	0.808517	0.891497	0.18 (0.74)	-0.15 (-0.78, 0.47)	0.627881	0.804537	NA	NA	NA	NA	NA	NA	NA	NA	NA	NA	NA	NA	NA	NA	NA	NA	0
Tumor necrosis factor receptor 2	TNFRSF1B	single		No	0.08 (0.94)	-0.02 (-0.4, 0.35)	0.905762	0.967713	0.08 (0.98)	-0.11 (-0.45, 0.23)	0.512215	0.707206	0.05 (0.87)	-0.05 (-0.5, 0.4)	0.815135	0.892243	0.14 (0.78)	-0.26 (-0.97, 0.44)	0.460609	0.804537	NA	NA	NA	NA	NA	NA	NA	NA	NA	NA	NA	NA	NA	NA	NA	NA	0
Prostatic acid phosphatase	ACPP	single		No	0.09 (0.69)	-0.03 (-0.4, 0.33)	0.860661	0.967713	-0.11 (0.72)	0.11 (-0.19, 0.42)	0.464093	0.701191	0.1 (0.71)	-0.05 (-0.51, 0.41)	0.829637	0.904044	-0.12 (0.72)	0.16 (-0.58, 0.89)	0.67467	0.804537	NA	NA	NA	NA	NA	NA	NA	NA	NA	NA	NA	NA	NA	NA	NA	NA	0
von Willebrand factor	VWF	single		No	-0.15 (0.85)	0.13 (-0.24, 0.5)	0.490303	0.828156	-0.18 (0.94)	0.14 (-0.19, 0.47)	0.406308	0.6573	-0.04 (0.91)	-0.05 (-0.51, 0.41)	0.840149	0.909889	0.54 (1.04)	-0.67 (-1.42, 0.08)	0.0793554	0.768706	NA	NA	NA	NA	NA	NA	NA	NA	NA	NA	NA	NA	NA	NA	NA	NA	0
Alpha-1-antichymotrypsin	SERPINA3	composite		No	-0.24 (1.06)	0.36 (-0.02, 0.74)	0.0609923	0.29061	-0.01 (1.05)	-0.02 (-0.34, 0.31)	0.926687	0.946155	0.02 (1.21)	0.05 (-0.43, 0.52)	0.84249	0.909889	-0.24 (1.06)	0.17 (-0.55, 0.89)	0.643523	0.804537	NA	NA	NA	NA	NA	NA	NA	NA	NA	NA	NA	NA	NA	NA	NA	NA	0
Alpha-1-antitrypsin	SERPINA1	SVLGQLGITK		No	-0.15 (0.84)	0.17 (-0.23, 0.56)	0.403535	0.748542	0.14 (1.16)	-0.14 (-0.54, 0.25)	0.470762	0.706143	0.08 (1.07)	-0.05 (-0.56, 0.46)	0.851338	0.915377	0.75 (1.74)	-0.76 (-1.61, 0.09)	0.0788057	0.768706	NA	NA	NA	NA	NA	NA	NA	NA	NA	NA	NA	NA	NA	NA	NA	NA	0
T cell specific protein RANTES	CCL5	single		No	-0.16 (0.82)	0.18 (-0.2, 0.57)	0.344035	0.703829	-0.02 (0.88)	0.02 (-0.32, 0.36)	0.908423	0.946155	-0.01 (0.86)	0.04 (-0.44, 0.52)	0.864452	0.922237	0.32 (1.47)	-0.32 (-1.14, 0.5)	0.433507	0.804537	NA	NA	NA	NA	NA	NA	NA	NA	NA	NA	NA	NA	NA	NA	NA	NA	0
Secretogranin-1	CHGB	HLEEPGETQNAFLNER		No	0.14 (0.22)	-0.09 (-0.41, 0.23)	0.577128	0.887608	0.11 (0.3)	-0.12 (-0.38, 0.14)	0.361561	0.636661	0.06 (0.17)	-0.04 (-0.46, 0.39)	0.868682	0.922237	0.14 (0.28)	-0.21 (-0.92, 0.5)	0.556975	0.804537	NA	NA	NA	NA	NA	NA	NA	NA	NA	NA	NA	NA	NA	NA	NA	NA	0
Cathepsin D	CTSD	composite		No	-0.01 (0.8)	0.03 (-0.32, 0.38)	0.865181	0.967713	-0.12 (1.24)	0.13 (-0.26, 0.52)	0.5028	0.707206	-0.05 (1.06)	0.03 (-0.43, 0.49)	0.882059	0.931914	-0.23 (1.26)	0.18 (-0.53, 0.88)	0.617272	0.804537	NA	NA	NA	NA	NA	NA	NA	NA	NA	NA	NA	NA	NA	NA	NA	NA	0
TNF related apoptosis inducing ligand	TNFSF10	single		No	0.11 (0.82)	-0.1 (-0.47, 0.27)	0.588626	0.888423	-0.06 (1.06)	0.03 (-0.33, 0.38)	0.879443	0.942559	-0.04 (0.79)	-0.03 (-0.49, 0.44)	0.909852	0.951177	0.17 (1.47)	-0.28 (-1.08, 0.53)	0.494332	0.804537	NA	NA	NA	NA	NA	NA	NA	NA	NA	NA	NA	NA	NA	NA	NA	NA	0
Golgi membrane protein 1	GOLM1	DQLVIPDGQEEEQEAAGEGR		No	-0.78 (3.22)	0.84 (-0.06, 1.73)	0.0657938	0.301658	-0.12 (2.05)	0.11 (-0.47, 0.69)	0.709111	0.86157	-0.1 (0.82)	0.03 (-0.44, 0.49)	0.912034	0.951177	-0.5 (0.99)	0.43 (-0.33, 1.18)	0.264061	0.771034	NA	NA	NA	NA	NA	NA	NA	NA	NA	NA	NA	NA	NA	NA	NA	NA	0
Latrophilin-1	ADGRL1	SGETVINTANYHDTSPYR		No	0.03 (0.86)	0.02 (-0.37, 0.42)	0.899152	0.967713	-0.03 (0.96)	0.03 (-0.32, 0.38)	0.870533	0.942559	0.05 (0.38)	-0.02 (-0.46, 0.41)	0.92263	0.954039	0.16 (0.26)	-0.19 (-0.92, 0.53)	0.595318	0.804537	NA	NA	NA	NA	NA	NA	NA	NA	NA	NA	NA	NA	NA	NA	NA	NA	0
Serum glutamic oxaloacetic transaminase	GOT1	single (RBM)		No	0.03 (1.14)	-0.04 (-0.48, 0.4)	0.85822	0.967713	0.05 (0.89)	-0.04 (-0.38, 0.3)	0.811174	0.926914	0.01 (0.84)	-0.02 (-0.5, 0.46)	0.937285	0.965086	0.17 (1.07)	-0.2 (-0.97, 0.58)	0.610101	0.804537	NA	NA	NA	NA	NA	NA	NA	NA	NA	NA	NA	NA	NA	NA	NA	NA	0
Complement C3	C3	LSINTHPSQKPLSITVR		No	0.18 (0.71)	-0.11 (-0.47, 0.26)	0.555324	0.870605	0.13 (0.88)	-0.14 (-0.47, 0.2)	0.416899	0.662134	0.05 (0.92)	0.01 (-0.47, 0.49)	0.953721	0.974242	0.51 (0.2)	-0.5 (-1.22, 0.22)	0.166676	0.768706	NA	NA	NA	NA	NA	NA	NA	NA	NA	NA	NA	NA	NA	NA	NA	NA	0
Alpha-1-antitrypsin	SERPINA1	single (RBM)		No	-0.21 (0.87)	0.3 (-0.09, 0.68)	0.128766	0.474093	-0.19 (1.05)	0.18 (-0.18, 0.53)	0.32661	0.601258	0.03 (1.27)	0.01 (-0.5, 0.53)	0.954196	0.974242	-0.39 (1.54)	0.4 (-0.41, 1.22)	0.327189	0.804537	NA	NA	NA	NA	NA	NA	NA	NA	NA	NA	NA	NA	NA	NA	NA	NA	0
Immunoglobulin A	IGHA1	single		No	-0.07 (1.11)	0.2 (-0.21, 0.61)	0.343074	0.703829	-0.22 (0.88)	0.24 (-0.07, 0.55)	0.125735	0.500062	0.13 (1.09)	-0.01 (-0.48, 0.46)	0.963781	0.979911	0.22 (0.84)	-0.15 (-0.85, 0.55)	0.667615	0.804537	NA	NA	NA	NA	NA	NA	NA	NA	NA	NA	NA	NA	NA	NA	NA	NA	0
Adiponectin	ADIPOQ	single		No	-0.22 (0.95)	0.26 (-0.15, 0.67)	0.208886	0.620697	0.01 (0.87)	-0.02 (-0.35, 0.31)	0.909353	0.946155	0.05 (0.76)	0 (-0.46, 0.47)	0.984251	0.990299	-0.38 (1.03)	0.45 (-0.32, 1.21)	0.249051	0.771034	NA	NA	NA	NA	NA	NA	NA	NA	NA	NA	NA	NA	NA	NA	NA	NA	0
Interleukin 8	CXCL8	LWEGSTSR		No	-0.13 (0.88)	0.21 (-0.18, 0.59)	0.287917	0.693765	-0.27 (0.93)	0.27 (-0.07, 0.61)	0.121778	0.493698	0.03 (0.89)	0 (-0.48, 0.49)	0.985585	0.990299	-0.21 (0.56)	0.23 (-0.49, 0.95)	0.529107	0.804537	NA	NA	NA	NA	NA	NA	NA	NA	NA	NA	NA	NA	NA	NA	NA	NA	0
Calcitonin	CALCA	single		No	0.07 (1.07)	-0.08 (-0.51, 0.35)	0.713608	0.955875	0.06 (1.01)	-0.06 (-0.42, 0.29)	0.729203	0.872888	0.03 (1.05)	0 (-0.51, 0.51)	0.994173	0.994173	-0.26 (0.46)	0.24 (-0.5, 0.98)	0.515014	0.804537	NA	NA	NA	NA	NA	NA	NA	NA	NA	NA	NA	NA	NA	NA	NA	NA	0

## Sheet: Supplementary table 2
Supplementary table 2. Comparisons of protein concentrations for APOE e4 non-carriers with abnormal amyloid according to MMSE category against controls (i.e., APOE non-carriers with normal amyloid and MMSE >27). Proteins were Z transformed according to the mean and SD of the control group. Betas (95%CI) show the difference of the control group minus the test group and are adjusted for age and sex.
					ADNI												EMIF-AD MBD
					MMSE >27				MMSE 27-24				MMSE < 24				MMSE >27				MMSE 27-24				MMSE < 24
Protein name	Gene	Single protein, composite, Fragment	Ordering figure	Measured in EMIF-AD MBD	Mean (SD)	Beta (95%CI) versus controls	P-value	P-value FDR corrected	Mean (SD)	Beta (95%CI) versus controls	P-value	P-value FDR corrected	Mean (SD)	Beta (95%CI) versus controls	P-value	P-value FDR corrected	Mean (SD)	Beta (95%CI) versus controls	P-value	P-value FDR corrected	Mean (SD)	Beta (95%CI) versus controls	P-value	P-value FDR corrected	Mean (SD)	Beta (95%CI) versus controls	P-value	P-value FDR corrected	Number of Observations in EMIF-AD MBD
Apolipoprotein E	APOE	LGADMEDVR		No	-0.09 (1.49)	0.08 (-0.48, 0.65)	0.768547	0.908476	-0.15 (1.23)	0.18 (-0.28, 0.65)	0.436536	0.719592	-0.26 (2.04)	0.29 (-0.58, 1.15)	0.512676	0.991981	NA	NA	NA	NA	NA	NA	NA	NA	NA	NA	NA	NA	0
Nicastrin	NCSTN	composite	2	Yes	-0.11 (0.99)	0.14 (-0.31, 0.6)	0.536877	0.77196	-0.14 (1.16)	0.15 (-0.29, 0.58)	0.507641	0.747617	0.13 (1.29)	-0.15 (-0.85, 0.56)	0.684102	0.991981	0.09 (0.7)	-0.24 (-0.94, 0.45)	0.482196	0.875598	0.33 (0.56)	-0.78 (-1.74, 0.18)	0.106	0.735944	0.12 (0.86)	-0.29 (-1.24, 0.65)	0.523753	0.958816	24
Tau	MAPT	single	3	Yes	1.15 (2.58)	-1.05 (-1.82, -0.28)	0.00804966	0.488571	2.19 (2.41)	-2.19 (-2.91, -1.48)	2.60442e-08	6.32875e-06	3.99 (3.52)	-3.94 (-5.06, -2.82)	1.54763e-09	3.76074e-07	1.22 (3.46)	-0.63 (-1.78, 0.52)	0.277432	0.821504	3.64 (2.4)	-3.6 (-4.57, -2.62)	5.58901e-10	1.35813e-07	5.65 (5.07)	-5.93 (-7.64, -4.23)	4.2355e-09	1.02923e-06	55
Neurogranin	NRGN	single (ELISA)	4	Yes	0.85 (2.75)	-0.76 (-1.58, 0.05)	0.0651264	0.488571	0.98 (1.45)	-0.99 (-1.5, -0.48)	0.000233217	0.0283359	1.66 (2.02)	-1.62 (-2.48, -0.76)	0.000368645	0.0447904	0.45 (2.11)	-0.15 (-0.92, 0.63)	0.70572	0.921579	0.66 (1.55)	-0.89 (-1.63, -0.14)	0.0207732	0.552523	1.04 (1.18)	-1.01 (-1.66, -0.35)	0.0032199	0.238091	46
Fatty acid-binding protein, heart	FABP3	single	5	Yes	0.18 (0.94)	-0.08 (-0.48, 0.31)	0.677221	0.880025	0.61 (0.85)	-0.54 (-0.89, -0.19)	0.00257456	0.20854	0.9 (1.21)	-0.79 (-1.44, -0.14)	0.0174552	0.706936	-0.01 (0.99)	0.26 (-0.23, 0.74)	0.298891	0.821504	0.75 (0.86)	-0.7 (-1.31, -0.1)	0.02268	0.552523	0.8 (1.2)	-0.77 (-1.51, -0.04)	0.0391212	0.615067	53
Visinin-like protein 1	VSNL1	single (ELISA)	6	No	0.05 (0.93)	-0.09 (-0.77, 0.58)	0.77904	0.908476	0.39 (1.18)	-0.39 (-1.02, 0.24)	0.215145	0.517625	1.8 (1.16)	-1.58 (-2.79, -0.37)	0.0118247	0.574682	NA	NA	NA	NA	NA	NA	NA	NA	NA	NA	NA	NA	0
Chitinase-3-like protein 1	CHI3L1	composite	7	Yes	-0.1 (0.94)	0.22 (-0.2, 0.65)	0.303145	0.615354	0.28 (0.83)	-0.24 (-0.61, 0.12)	0.193796	0.508399	0.75 (0.76)	-0.53 (-1.18, 0.12)	0.108029	0.991981	0.32 (0.93)	-0.15 (-0.61, 0.31)	0.517668	0.875598	1.18 (0.9)	-1.03 (-1.62, -0.44)	0.000897763	0.0545391	0.89 (0.92)	-0.87 (-1.48, -0.25)	0.00685858	0.238091	55
Neurofilament light	NEFL	single	8	Yes	0.09 (0.55)	-0.04 (-0.46, 0.39)	0.866316	0.939799	0.13 (0.48)	-0.1 (-0.46, 0.26)	0.575048	0.812422	0.95 (1.37)	-0.88 (-1.63, -0.13)	0.0222931	0.773888	0.84 (2.02)	-0.15 (-0.78, 0.48)	0.639268	0.921579	2.06 (1.14)	-1.72 (-2.33, -1.11)	5.12347e-07	6.22502e-05	4.05 (4.99)	-3.44 (-5.08, -1.8)	9.52142e-05	0.0115685	55
Osteopontin	SPP1	composite	9	Yes	0.15 (1.3)	-0.11 (-0.57, 0.36)	0.649532	0.862494	0.39 (0.96)	-0.39 (-0.76, -0.02)	0.0396166	0.291914	0.92 (1.37)	-0.86 (-1.51, -0.21)	0.0103483	0.574682	0.21 (1.02)	-0.09 (-0.57, 0.38)	0.696099	0.921579	1.28 (0.88)	-1.21 (-1.79, -0.62)	0.000111843	0.00905929	0.83 (0.88)	-0.84 (-1.44, -0.24)	0.00667579	0.238091	55
Fibroblast growth factor 4	FGF4	single	10	No	0.24 (0.93)	-0.28 (-0.75, 0.19)	0.241662	0.611708	0.42 (0.96)	-0.41 (-0.84, 0.01)	0.0559763	0.320048	0.31 (0.58)	-0.35 (-1.06, 0.35)	0.322585	0.991981	NA	NA	NA	NA	NA	NA	NA	NA	NA	NA	NA	NA	0
Hepatocyte growth factor	HGF	single	11	No	0.47 (1.01)	-0.46 (-0.95, 0.03)	0.0679183	0.488571	0.44 (1.09)	-0.42 (-0.86, 0.02)	0.0641314	0.320591	0.59 (1.02)	-0.61 (-1.34, 0.13)	0.105542	0.991981	NA	NA	NA	NA	NA	NA	NA	NA	NA	NA	NA	NA	0
Gamma-enolase	ENO2	GNPTVEVDLYTAK	12	Yes	0.42 (0.72)	-0.38 (-0.83, 0.07)	0.097108	0.488571	0.37 (0.98)	-0.37 (-0.8, 0.06)	0.0889311	0.379127	0.61 (1.29)	-0.62 (-1.39, 0.14)	0.109347	0.991981	0.23 (0.84)	-0.21 (-0.67, 0.24)	0.350173	0.868285	0.77 (1.02)	-0.92 (-1.55, -0.28)	0.0056584	0.274998	0.77 (1.21)	-0.96 (-1.62, -0.31)	0.0049604	0.238091	51
Fructose-bisphosphate aldolase A	ALDOA	composite	13	Yes	0.05 (1.02)	0.01 (-0.46, 0.48)	0.967307	0.983237	0.22 (1.04)	-0.2 (-0.62, 0.22)	0.343478	0.644636	0.63 (1.23)	-0.57 (-1.32, 0.17)	0.130816	0.991981	0.06 (0.94)	0.06 (-0.4, 0.51)	0.800829	0.931107	0.5 (0.86)	-0.48 (-1.07, 0.1)	0.102251	0.735944	0.71 (1.31)	-0.78 (-1.45, -0.11)	0.0232162	0.501888	55
Pyruvate kinase isozymes M1 M2	PKM	LDIDSPPITAR	14	Yes	0.09 (1.05)	-0.02 (-0.49, 0.46)	0.94596	0.978163	0.2 (1.18)	-0.17 (-0.61, 0.27)	0.450903	0.725373	0.4 (1.37)	-0.31 (-1.08, 0.45)	0.416118	0.991981	0.18 (1.01)	-0.08 (-0.56, 0.39)	0.727667	0.921579	0.32 (1)	-0.25 (-0.87, 0.36)	0.412591	0.803047	0.8 (1.2)	-0.86 (-1.51, -0.2)	0.0111907	0.287341	55
Aspartate aminotransferase, mitochondrial	GOT2	FVTVQTISGTGALR	15	Yes	-0.03 (1.1)	0.05 (-0.45, 0.55)	0.834024	0.930011	-0.05 (1.15)	0.05 (-0.41, 0.51)	0.830524	0.921541	0.17 (1.08)	-0.23 (-0.97, 0.51)	0.533408	0.991981	-0.04 (0.74)	0.04 (-0.39, 0.47)	0.853529	0.946404	0.19 (0.77)	-0.25 (-0.81, 0.3)	0.369214	0.796954	0.39 (1.03)	-0.48 (-1.09, 0.13)	0.122846	0.958816	55
Aspartate aminotransferase, cytoplasmic	GOT1	composite	16	Yes	0.04 (1.04)	0.01 (-0.46, 0.48)	0.960754	0.983237	0.11 (1.09)	-0.1 (-0.52, 0.33)	0.655634	0.865864	0.19 (1.17)	-0.13 (-0.86, 0.59)	0.713401	0.991981	0.02 (0.82)	0.01 (-0.42, 0.45)	0.949323	0.969267	0.42 (1.02)	-0.49 (-1.1, 0.13)	0.118553	0.784912	0.45 (1.09)	-0.53 (-1.15, 0.09)	0.0940345	0.958816	55
Agouti related protein	AGRP	single	17	No	0.1 (1.2)	-0.1 (-0.61, 0.4)	0.688094	0.885583	0.18 (1.06)	-0.2 (-0.64, 0.23)	0.358563	0.655118	0.17 (1.44)	-0.12 (-0.89, 0.66)	0.764723	0.991981	NA	NA	NA	NA	NA	NA	NA	NA	NA	NA	NA	NA	0
S100 calcium binding protein B	S100B	single	18	Yes	-0.16 (0.87)	0.21 (-0.25, 0.68)	0.360908	0.679851	-0.11 (1.17)	0.12 (-0.33, 0.57)	0.606016	0.833002	0.56 (1.16)	-0.51 (-1.27, 0.24)	0.175587	0.991981	0.18 (1.02)	-0.27 (-1.11, 0.57)	0.51902	0.875598	0.6 (1.44)	-0.84 (-1.97, 0.3)	0.140672	0.786484	-0.28 (1.27)	0.09 (-1.8, 1.98)	0.917973	0.974808	24
Apolipoprotein B-100	APOB	IAELSATAQEIIK	19	Yes	0.44 (0.39)	-0.4 (-0.82, 0.02)	0.0646144	0.488571	0.22 (0.59)	-0.21 (-0.59, 0.16)	0.259525	0.588577	0.03 (0.97)	0.05 (-0.67, 0.78)	0.883471	0.992086	0.41 (1.04)	-0.31 (-0.94, 0.31)	0.317568	0.821504	-0.08 (0.88)	0.21 (-0.55, 0.96)	0.578026	0.894652	-0.54 (0.51)	0.59 (-0.2, 1.38)	0.13795	0.958816	34
Apolipoprotein D	APOD	VLNQELR	20	Yes	0.17 (0.75)	-0.15 (-0.61, 0.31)	0.518262	0.758661	0.56 (0.54)	-0.55 (-0.92, -0.18)	0.0042585	0.212812	0.41 (0.78)	-0.37 (-1.09, 0.34)	0.302235	0.991981	0.09 (0.95)	0.1 (-0.38, 0.59)	0.668209	0.921579	0.66 (0.93)	-0.41 (-0.99, 0.17)	0.158648	0.786484	-0.22 (1.19)	0.26 (-0.4, 0.92)	0.429779	0.958816	51
Apolipoprotein aL	LPA	single	21	No	0.09 (1.2)	-0.09 (-0.61, 0.42)	0.72166	0.908476	-0.2 (1.02)	0.17 (-0.26, 0.6)	0.429776	0.719592	-0.26 (1.31)	0.3 (-0.46, 1.06)	0.435271	0.991981	NA	NA	NA	NA	NA	NA	NA	NA	NA	NA	NA	NA	0
Endothelin1ET1pgmL	EDN1		22	No	0.41 (1.19)	-0.4 (-0.91, 0.11)	0.126007	0.489592	0.52 (1.19)	-0.51 (-0.98, -0.05)	0.0308302	0.291914	0.2 (1.24)	-0.26 (-1.01, 0.49)	0.491014	0.991981	NA	NA	NA	NA	NA	NA	NA	NA	NA	NA	NA	NA	0
Glial fibrillary acidic protein	GFAP	ALAAELNQLR	23	No	-0.25 (0.97)	0.35 (-0.1, 0.8)	0.122065	0.489592	0.23 (1.16)	-0.2 (-0.61, 0.21)	0.340836	0.644636	1.16 (0.87)	-0.96 (-1.63, -0.28)	0.00610178	0.494244	NA	NA	NA	NA	NA	NA	NA	NA	NA	NA	NA	NA	0
Sortilin	SORT1	single	24	Yes	-0.26 (0.97)	0.29 (-0.19, 0.78)	0.227129	0.599916	0.05 (1.13)	-0.07 (-0.51, 0.38)	0.761392	0.919813	0.86 (1.37)	-0.83 (-1.6, -0.06)	0.035051	0.921492	0.11 (0.82)	-0.27 (-0.69, 0.16)	0.213405	0.821504	0.48 (1.13)	-0.79 (-1.42, -0.17)	0.0133992	0.465142	0.08 (0.77)	-0.2 (-0.77, 0.36)	0.472907	0.958816	55
Resistin	RETN	single	25	No	0.31 (1.38)	-0.28 (-0.82, 0.26)	0.303385	0.615354	0.27 (1.12)	-0.22 (-0.66, 0.21)	0.315898	0.634408	0.75 (1.01)	-0.77 (-1.5, -0.04)	0.0385857	0.921492	NA	NA	NA	NA	NA	NA	NA	NA	NA	NA	NA	NA	0
N terminal pro hormone of brain natriuretic peptide	NPPB	single	26	No	0.32 (0.96)	-0.3 (-0.78, 0.18)	0.220275	0.588206	0.23 (1.08)	-0.24 (-0.66, 0.19)	0.273199	0.594231	0.82 (1.11)	-0.77 (-1.51, -0.03)	0.0404982	0.921492	NA	NA	NA	NA	NA	NA	NA	NA	NA	NA	NA	NA	0
Macrophage migration inhibitory factor	MIF	single	27	Yes	0.52 (0.99)	-0.47 (-0.95, 0.01)	0.0560547	0.488571	0.05 (1.13)	-0.04 (-0.49, 0.41)	0.86882	0.933225	0.85 (0.82)	-0.74 (-1.45, -0.03)	0.0417136	0.921492	0.22 (1.06)	-0.03 (-0.56, 0.51)	0.922061	0.961634	0.58 (0.79)	-0.51 (-1.12, 0.1)	0.0988922	0.735944	0.88 (1.12)	-0.93 (-1.6, -0.25)	0.0081749	0.248313	47
Leptin	LEP	single	28	No	-0.03 (0.97)	-0.05 (-0.48, 0.39)	0.834331	0.930011	-0.29 (0.85)	0.21 (-0.16, 0.58)	0.260031	0.588577	-0.28 (1.04)	0.17 (-0.48, 0.83)	0.602294	0.991981	NA	NA	NA	NA	NA	NA	NA	NA	NA	NA	NA	NA	0
Thyroxine binding globulin	SERPINA7	single	29	Yes	-0.12 (0.81)	0.11 (-0.34, 0.56)	0.618979	0.853604	-0.23 (0.93)	0.29 (-0.12, 0.69)	0.161712	0.485335	-0.03 (1.2)	-0.09 (-0.81, 0.63)	0.800616	0.991981	0.3 (1.22)	-0.37 (-0.91, 0.17)	0.174922	0.821504	0.32 (1.2)	-0.44 (-1.1, 0.22)	0.184663	0.786484	0.12 (1.34)	-0.04 (-0.73, 0.65)	0.914584	0.974808	55
Inter-alpha-trypsin inhibitor heavy chain H1	ITIH1	composite	30	Yes	-0.24 (0.89)	0.27 (-0.19, 0.72)	0.253658	0.612677	-0.28 (0.81)	0.34 (-0.04, 0.72)	0.0771655	0.340931	-0.21 (1.2)	0.14 (-0.55, 0.84)	0.684685	0.991981	0.11 (0.68)	-0.07 (-0.48, 0.35)	0.745403	0.921579	-0.08 (0.83)	0.1 (-0.47, 0.68)	0.720046	0.930489	-0.07 (0.6)	0.06 (-0.5, 0.63)	0.82017	0.958816	55
Protein AMBP	AMBP	composite	31	Yes	-0.09 (1.16)	0.15 (-0.31, 0.62)	0.514578	0.757851	-0.17 (1.03)	0.26 (-0.11, 0.64)	0.167992	0.496482	0.13 (1.23)	-0.12 (-0.79, 0.55)	0.724666	0.991981	0.27 (0.92)	-0.08 (-0.51, 0.35)	0.709592	0.921579	0.26 (0.88)	-0.09 (-0.66, 0.47)	0.7424	0.930489	0.15 (0.78)	-0.01 (-0.56, 0.53)	0.957875	0.987755	55
Cystatin-C	CST3	composite	32	Yes	0.04 (0.37)	-0.03 (-0.18, 0.12)	0.660081	0.866753	-0.07 (0.25)	0.08 (-0.03, 0.2)	0.155426	0.478083	-0.12 (0.36)	0.12 (-0.09, 0.34)	0.244424	0.991981	-0.34 (0.73)	0.37 (-0.06, 0.8)	0.0871792	0.821504	0.3 (1.13)	-0.33 (-0.97, 0.31)	0.306402	0.786484	0.15 (1)	-0.18 (-0.81, 0.45)	0.564397	0.958816	55
Metalloproteinase inhibitor 1	TIMP1	composite	33	Yes	-0.09 (0.94)	0.16 (-0.26, 0.58)	0.439189	0.732262	-0.29 (1.1)	0.36 (-0.01, 0.74)	0.056634	0.320048	0.27 (1.43)	-0.2 (-0.89, 0.49)	0.569213	0.991981	0.16 (0.83)	-0.08 (-0.54, 0.37)	0.709494	0.921579	0.43 (1.18)	-0.31 (-0.97, 0.34)	0.342989	0.786484	0.08 (0.88)	0.06 (-0.53, 0.66)	0.830715	0.958816	55
Leucine-rich alpha-2-glycoprotein	LRG1	composite	34	Yes	0.08 (0.87)	-0.06 (-0.52, 0.41)	0.809077	0.923031	-0.2 (0.89)	0.24 (-0.16, 0.64)	0.24003	0.566285	0.09 (1.09)	-0.14 (-0.86, 0.57)	0.692734	0.991981	0.36 (1.13)	-0.36 (-0.88, 0.17)	0.178912	0.821504	0.33 (1.21)	-0.28 (-0.94, 0.39)	0.407841	0.803047	0.41 (1.93)	-0.12 (-0.89, 0.65)	0.762741	0.958816	55
Serum amyloid P component	APCS	single	35	Yes	-0.01 (1.04)	0.07 (-0.35, 0.5)	0.735744	0.908476	-0.22 (1.07)	0.34 (-0.02, 0.7)	0.0628311	0.320591	-0.31 (0.84)	0.3 (-0.27, 0.88)	0.296935	0.991981	-0.13 (0.87)	0.14 (-0.27, 0.56)	0.49518	0.875598	-0.28 (0.83)	0.29 (-0.23, 0.81)	0.266687	0.786484	-0.61 (0.61)	0.56 (0.04, 1.07)	0.036446	0.615067	55
Apolipoprotein H	APOH	single	36	Yes	-0.05 (1.13)	0.07 (-0.4, 0.54)	0.767139	0.908476	-0.25 (1.25)	0.34 (-0.08, 0.77)	0.1131	0.404165	-0.06 (1.04)	-0.02 (-0.67, 0.63)	0.955723	0.995943	0.16 (1.01)	-0.08 (-0.53, 0.38)	0.74289	0.921579	0.11 (0.91)	-0.03 (-0.59, 0.54)	0.927262	0.958821	0.07 (0.62)	0.01 (-0.51, 0.53)	0.978576	0.987755	55
N-acetylmuramoyl-L-alanine amidase	PGLYRP2	composite	37	Yes	-0.16 (0.78)	0.2 (-0.22, 0.61)	0.34871	0.662005	-0.25 (0.83)	0.34 (-0.02, 0.7)	0.0642775	0.320591	-0.08 (1.22)	0.03 (-0.63, 0.69)	0.93242	0.992086	0.14 (0.78)	-0.12 (-0.56, 0.31)	0.571805	0.905102	0.15 (1.01)	-0.18 (-0.78, 0.41)	0.539978	0.852656	0.25 (0.68)	-0.23 (-0.78, 0.33)	0.418007	0.958816	55
Myoglobin	MB	single	38	Yes	-0.24 (0.8)	0.24 (-0.2, 0.69)	0.281386	0.615354	-0.33 (0.9)	0.38 (-0.02, 0.79)	0.0646459	0.320591	-0.18 (0.82)	0.11 (-0.58, 0.79)	0.754639	0.991981	-0.22 (0.34)	0.18 (-0.29, 0.66)	0.441573	0.875598	-0.04 (0.82)	-0.15 (-1.07, 0.77)	0.736419	0.930489	-0.21 (0.52)	0.23 (-0.54, 0.99)	0.548866	0.958816	33
Complement C3	C3	TGLQEVEVK	39	Yes	-0.06 (1)	0.05 (-0.43, 0.53)	0.834314	0.930011	-0.05 (0.92)	0.05 (-0.36, 0.47)	0.794583	0.920621	0.5 (0.76)	-0.57 (-1.28, 0.14)	0.113972	0.991981	-0.01 (1.54)	0.1 (-0.56, 0.75)	0.769617	0.921579	0.84 (2.1)	-0.62 (-1.56, 0.32)	0.189886	0.786484	0.07 (1.28)	0.09 (-0.61, 0.79)	0.803542	0.958816	51
Factor H	CFH	single	40	Yes	-0.18 (1.09)	0.25 (-0.21, 0.71)	0.278468	0.615354	-0.13 (1.12)	0.22 (-0.18, 0.62)	0.277748	0.594231	0.37 (1.78)	-0.33 (-1.09, 0.43)	0.394585	0.991981	0.03 (0.95)	0.04 (-0.43, 0.52)	0.856826	0.946404	0.75 (1.6)	-0.77 (-1.51, -0.03)	0.0429277	0.677562	-0.28 (0.91)	0.47 (-0.11, 1.06)	0.111711	0.958816	55
C-reactive protein	CRP	composite	41	No	-0.02 (0.95)	-0.02 (-0.49, 0.45)	0.934458	0.970399	-0.28 (1.14)	0.29 (-0.16, 0.74)	0.19893	0.509674	-0.43 (0.78)	0.41 (-0.28, 1.11)	0.240436	0.991981	NA	NA	NA	NA	NA	NA	NA	NA	NA	NA	NA	NA	0
Interferon gamma induced protein 10	CXCL10	single	42	No	0.12 (1.3)	-0.08 (-0.61, 0.44)	0.753878	0.908476	-0.2 (1.34)	0.25 (-0.22, 0.73)	0.291678	0.605793	-0.34 (0.95)	0.36 (-0.36, 1.08)	0.320593	0.991981	NA	NA	NA	NA	NA	NA	NA	NA	NA	NA	NA	NA	0
Apolipoprotein E	APOE	CLAVYQAGAR	43	No	-0.41 (1.14)	0.4 (-0.11, 0.9)	0.124235	0.489592	-0.2 (1.29)	0.17 (-0.31, 0.65)	0.474546	0.733063	-0.44 (0.25)	0.43 (-0.25, 1.12)	0.21116	0.991981	NA	NA	NA	NA	NA	NA	NA	NA	NA	NA	NA	NA	0
Interleukin 3	IL3	single	44	No	-0.34 (0.86)	0.38 (-0.08, 0.84)	0.10507	0.489592	-0.4 (1.11)	0.44 (0.01, 0.88)	0.0470958	0.291914	-0.27 (0.51)	0.28 (-0.4, 0.96)	0.414381	0.991981	NA	NA	NA	NA	NA	NA	NA	NA	NA	NA	NA	NA	0
Apolipoprotein AI	APOA1	single	45	Yes	-0.24 (0.89)	0.25 (-0.21, 0.7)	0.285517	0.615354	-0.3 (0.92)	0.34 (-0.06, 0.75)	0.0952208	0.383115	-0.21 (1.03)	0.11 (-0.58, 0.8)	0.751694	0.991981	0.18 (0.78)	-0.12 (-0.56, 0.31)	0.579516	0.905102	-0.05 (1.17)	0.16 (-0.48, 0.8)	0.618482	0.895501	-0.07 (0.83)	0.13 (-0.46, 0.71)	0.662686	0.958816	55
Alpha-2-HS-glycoprotein	AHSG	composite	46	Yes	-0.19 (0.82)	0.23 (-0.2, 0.66)	0.292925	0.615354	-0.4 (0.84)	0.48 (0.11, 0.85)	0.0113682	0.276248	-0.43 (1.02)	0.37 (-0.27, 1.02)	0.251101	0.991981	0.02 (0.87)	0.02 (-0.42, 0.46)	0.92706	0.962716	0.45 (1.09)	-0.39 (-1, 0.21)	0.200502	0.786484	-0.09 (1.09)	0.14 (-0.48, 0.77)	0.652038	0.958816	55
Ceruloplasmin	CP	composite	47	Yes	-0.18 (0.88)	0.2 (-0.27, 0.66)	0.396117	0.706928	-0.39 (0.92)	0.44 (0.03, 0.84)	0.0357845	0.291914	-0.05 (1.22)	-0.01 (-0.73, 0.71)	0.976054	0.995943	0.3 (1.12)	-0.33 (-0.84, 0.19)	0.212863	0.821504	0.31 (1.18)	-0.29 (-0.94, 0.37)	0.381277	0.803047	-0.04 (1.42)	0.23 (-0.47, 0.92)	0.518353	0.958816	55
Alpha-1B-glycoprotein	A1BG	composite	48	Yes	-0.2 (0.78)	0.2 (-0.25, 0.65)	0.380902	0.695934	-0.43 (0.95)	0.48 (0.07, 0.89)	0.021211	0.291914	-0.26 (1.24)	0.18 (-0.55, 0.92)	0.617495	0.991981	0.06 (1.06)	-0.02 (-0.52, 0.48)	0.938984	0.966788	0.03 (1.17)	0 (-0.65, 0.65)	0.999376	0.999376	0.24 (0.93)	-0.12 (-0.72, 0.48)	0.689627	0.958816	55
Afamin	AFM	composite	49	Yes	-0.35 (0.86)	0.35 (-0.09, 0.8)	0.118246	0.489592	-0.37 (0.88)	0.43 (0.05, 0.81)	0.0288366	0.291914	-0.29 (1.18)	0.17 (-0.5, 0.83)	0.617326	0.991981	0.05 (0.88)	-0.07 (-0.52, 0.37)	0.743246	0.921579	0.11 (1.14)	-0.11 (-0.73, 0.52)	0.738851	0.930489	-0.04 (0.9)	0.06 (-0.53, 0.66)	0.836801	0.958816	55
Complement C2	C2	composite	50	Yes	-0.09 (0.8)	0.12 (-0.32, 0.55)	0.597138	0.829168	-0.45 (1.1)	0.54 (0.14, 0.94)	0.00941015	0.262662	-0.1 (1.31)	0.03 (-0.67, 0.73)	0.934586	0.992086	-0.11 (1.17)	-0.03 (-0.55, 0.5)	0.911938	0.959344	0.08 (1.94)	-0.26 (-1.11, 0.58)	0.533894	0.852656	-0.23 (1.17)	0.34 (-0.31, 1)	0.29787	0.958816	55
Complement C3	C3	composite	51	Yes	-0.05 (0.99)	0.1 (-0.33, 0.52)	0.655654	0.865891	-0.32 (1.02)	0.39 (0.02, 0.76)	0.0385015	0.291914	0.15 (1.27)	-0.15 (-0.8, 0.5)	0.645021	0.991981	-0.2 (0.9)	0.24 (-0.22, 0.71)	0.301146	0.821504	0.24 (1.29)	-0.24 (-0.91, 0.44)	0.488136	0.823377	-0.31 (0.79)	0.37 (-0.22, 0.95)	0.217869	0.958816	55
Complement C5	C5	composite	52	Yes	-0.21 (0.96)	0.25 (-0.21, 0.71)	0.279343	0.615354	-0.54 (1.1)	0.61 (0.2, 1.03)	0.00437884	0.212812	-0.17 (1.59)	0.09 (-0.64, 0.83)	0.797913	0.991981	0.11 (0.89)	-0.07 (-0.53, 0.38)	0.754233	0.921579	-0.12 (1.03)	0.12 (-0.49, 0.74)	0.687268	0.917616	-0.11 (0.66)	0.17 (-0.4, 0.74)	0.56007	0.958816	55
Complement component C6	C6	composite	53	Yes	-0.23 (1.06)	0.27 (-0.22, 0.75)	0.275653	0.615354	-0.42 (0.96)	0.48 (0.07, 0.88)	0.0216593	0.291914	-0.06 (1.58)	0.01 (-0.74, 0.76)	0.984725	0.996433	0.13 (0.68)	-0.17 (-0.6, 0.26)	0.428661	0.875598	0 (0.96)	-0.09 (-0.7, 0.52)	0.773292	0.933473	0.09 (0.66)	-0.06 (-0.64, 0.52)	0.840932	0.958816	55
Complement factor B	CFB	composite	54	Yes	-0.2 (0.95)	0.19 (-0.26, 0.65)	0.403361	0.706928	-0.44 (0.92)	0.51 (0.13, 0.89)	0.0089677	0.262662	-0.39 (1.19)	0.28 (-0.39, 0.96)	0.404035	0.991981	-0.09 (0.94)	-0.08 (-0.55, 0.39)	0.740614	0.921579	0.06 (1.13)	-0.25 (-0.87, 0.37)	0.421135	0.803047	-0.33 (0.99)	0.39 (-0.22, 1.01)	0.205203	0.958816	55
Prothrombin	F2	composite	55	Yes	-0.28 (1)	0.31 (-0.16, 0.78)	0.198265	0.582232	-0.41 (1)	0.49 (0.09, 0.89)	0.0167115	0.291914	-0.05 (1.4)	-0.02 (-0.74, 0.7)	0.956862	0.995943	0.06 (0.92)	-0.11 (-0.58, 0.36)	0.651469	0.921579	0.15 (1.26)	-0.3 (-0.96, 0.35)	0.354674	0.796954	0.14 (0.65)	-0.17 (-0.74, 0.41)	0.563846	0.958816	55
Plasminogen	PLG	composite	56	Yes	-0.2 (0.85)	0.22 (-0.22, 0.66)	0.327284	0.631191	-0.39 (0.85)	0.45 (0.08, 0.83)	0.0194402	0.291914	-0.15 (1.33)	0.07 (-0.62, 0.76)	0.839742	0.991981	0.16 (0.91)	-0.24 (-0.69, 0.22)	0.300297	0.821504	-0.09 (1.16)	-0.01 (-0.64, 0.62)	0.974126	0.98221	-0.14 (0.93)	0.11 (-0.49, 0.72)	0.709897	0.958816	55
Hemopexin	HPX	composite	57	Yes	-0.11 (0.83)	0.16 (-0.28, 0.6)	0.467081	0.732262	-0.33 (0.91)	0.4 (0.02, 0.79)	0.0387818	0.291914	0.03 (1.38)	-0.03 (-0.74, 0.67)	0.922835	0.992086	0.2 (1.16)	-0.29 (-0.81, 0.23)	0.276612	0.821504	0.13 (1.11)	-0.24 (-0.86, 0.39)	0.448907	0.803047	-0.09 (0.88)	0.14 (-0.44, 0.73)	0.623661	0.958816	55
Kininogen-1	KNG1	composite	58	Yes	-0.23 (0.86)	0.24 (-0.21, 0.69)	0.29709	0.615354	-0.38 (0.9)	0.45 (0.06, 0.84)	0.0252781	0.291914	-0.19 (1.17)	0.09 (-0.59, 0.78)	0.782136	0.991981	-0.15 (0.83)	0.19 (-0.25, 0.63)	0.386842	0.875598	-0.2 (1.03)	0.24 (-0.36, 0.83)	0.428098	0.803047	-0.04 (0.73)	0.12 (-0.43, 0.67)	0.670296	0.958816	55
Vitamin D-binding protein	GC	composite	59	Yes	-0.28 (0.88)	0.29 (-0.16, 0.75)	0.202502	0.582232	-0.37 (0.9)	0.43 (0.04, 0.82)	0.0312963	0.291914	-0.26 (1.22)	0.17 (-0.52, 0.87)	0.619647	0.991981	0.3 (0.98)	-0.44 (-0.91, 0.03)	0.0671753	0.821504	0.17 (1.32)	-0.39 (-1.05, 0.28)	0.250697	0.786484	0.04 (1.18)	-0.06 (-0.71, 0.58)	0.841453	0.958816	55
Mimecan	OGN	composite	60	Yes	-0.33 (1.05)	0.38 (-0.06, 0.82)	0.0865506	0.488571	-0.29 (1.02)	0.38 (0, 0.75)	0.0480516	0.291914	-0.41 (1.32)	0.42 (-0.26, 1.11)	0.220662	0.991981	-0.12 (0.63)	0.1 (-0.31, 0.52)	0.626053	0.921579	0.14 (1.08)	-0.33 (-0.95, 0.29)	0.294044	0.786484	0.04 (0.47)	-0.05 (-0.61, 0.52)	0.869717	0.958972	55
Kallistatin	SERPINA4	composite	61	Yes	-0.2 (0.88)	0.24 (-0.21, 0.68)	0.295366	0.615354	-0.42 (0.97)	0.49 (0.1, 0.89)	0.015587	0.291914	-0.21 (1.39)	0.14 (-0.56, 0.85)	0.689716	0.991981	0.2 (0.82)	-0.12 (-0.55, 0.31)	0.591158	0.914977	-0.12 (1.32)	0.16 (-0.48, 0.79)	0.624019	0.895501	-0.14 (0.97)	0.16 (-0.43, 0.75)	0.582852	0.958816	55
Monocyte differentiation antigen CD14	CD14	composite	62	Yes	-0.36 (0.95)	0.46 (0.02, 0.89)	0.0387504	0.488571	-0.3 (1.24)	0.37 (-0.03, 0.77)	0.0712439	0.332928	0.11 (1.15)	-0.01 (-0.7, 0.68)	0.970764	0.995943	-0.05 (0.74)	0.28 (-0.14, 0.69)	0.188516	0.821504	0.65 (1.02)	-0.38 (-0.98, 0.23)	0.220154	0.786484	0.45 (0.74)	-0.31 (-0.89, 0.28)	0.299061	0.958816	55
Clusterin	CLU	composite	63	Yes	-0.46 (0.85)	0.54 (0.13, 0.94)	0.00960935	0.488571	-0.35 (1.13)	0.4 (0.01, 0.79)	0.0451283	0.291914	0.31 (0.68)	-0.23 (-0.85, 0.4)	0.471415	0.991981	-0.13 (0.91)	0.23 (-0.24, 0.69)	0.334301	0.837476	0.51 (1.31)	-0.65 (-1.33, 0.03)	0.0618017	0.677562	0.63 (0.71)	-0.67 (-1.25, -0.09)	0.0247846	0.501888	55
Ferritin	FTL	single	64	No	-0.43 (0.9)	0.48 (0.01, 0.95)	0.0440216	0.488571	0.05 (1.22)	-0.02 (-0.47, 0.43)	0.926612	0.942841	0.48 (1.18)	-0.4 (-1.15, 0.35)	0.288801	0.991981	NA	NA	NA	NA	NA	NA	NA	NA	NA	NA	NA	NA	0
Biotinidase	BTD	composite	65	Yes	-0.53 (1.14)	0.62 (0.15, 1.09)	0.0103673	0.488571	-0.35 (1.23)	0.4 (-0.03, 0.84)	0.0686941	0.327307	-0.07 (1.12)	0.1 (-0.61, 0.82)	0.77074	0.991981	0.04 (0.6)	-0.12 (-0.51, 0.27)	0.546337	0.885066	0.48 (0.84)	-0.77 (-1.32, -0.22)	0.0070148	0.2841	0.04 (0.8)	-0.24 (-0.78, 0.31)	0.386028	0.958816	55
EGF-containing fibulin-like extracellular matrix protein 1	EFEMP1	composite	66	Yes	-0.37 (0.98)	0.46 (0.01, 0.9)	0.0445202	0.488571	-0.19 (1.04)	0.25 (-0.14, 0.63)	0.204003	0.509674	0 (1.13)	0.12 (-0.58, 0.81)	0.732094	0.991981	0.16 (0.76)	-0.05 (-0.47, 0.37)	0.817764	0.937541	0.44 (1.17)	-0.36 (-1.01, 0.29)	0.270923	0.786484	0.44 (0.58)	-0.37 (-0.94, 0.2)	0.194593	0.958816	55
Cochlin	COCH	GVISNSGGPVR	67	Yes	-0.38 (0.93)	0.48 (0.06, 0.9)	0.0269185	0.488571	0.05 (1.03)	0.03 (-0.36, 0.41)	0.897092	0.935354	0.14 (0.9)	-0.03 (-0.72, 0.65)	0.929715	0.992086	-0.17 (0.79)	0.21 (-0.24, 0.65)	0.359515	0.875598	0.44 (1.06)	-0.38 (-1.01, 0.25)	0.2371	0.786484	-0.09 (0.78)	0.11 (-0.49, 0.71)	0.719191	0.958816	55
Neuronal pentraxin-1	NPTX1	composite	68	Yes	-0.51 (0.96)	0.54 (0.07, 1.01)	0.0251437	0.488571	-0.48 (1.3)	0.47 (0, 0.93)	0.0516301	0.306003	-0.12 (0.96)	0.13 (-0.59, 0.84)	0.725616	0.991981	-0.23 (0.7)	0.15 (-0.25, 0.56)	0.454453	0.875598	0.03 (0.78)	-0.21 (-0.76, 0.34)	0.444464	0.803047	-0.04 (1.09)	-0.14 (-0.73, 0.45)	0.634119	0.958816	55
Neurexin-1	NRXN1	composite	69	Yes	-0.48 (0.85)	0.51 (0.05, 0.97)	0.0298269	0.488571	-0.29 (1.25)	0.31 (-0.15, 0.77)	0.180849	0.502804	-0.29 (0.92)	0.3 (-0.42, 1.01)	0.412752	0.991981	-0.14 (0.74)	0.11 (-0.31, 0.52)	0.611887	0.921579	0.22 (0.85)	-0.35 (-0.92, 0.22)	0.227984	0.786484	0.13 (1.24)	-0.27 (-0.9, 0.36)	0.394263	0.958816	55
Neurexin-2	NRXN2	composite	70	Yes	-0.51 (0.91)	0.55 (0.09, 1.01)	0.020301	0.488571	-0.36 (1.27)	0.38 (-0.09, 0.84)	0.109781	0.404165	-0.2 (0.97)	0.2 (-0.52, 0.91)	0.585706	0.991981	-0.23 (0.8)	0.18 (-0.25, 0.61)	0.406152	0.875598	0.04 (0.82)	-0.18 (-0.75, 0.39)	0.531039	0.852656	0.02 (1.19)	-0.19 (-0.81, 0.42)	0.527143	0.958816	55
Contactin-1	CNTN1	composite	71	Yes	-0.46 (0.79)	0.52 (0.1, 0.95)	0.0159822	0.488571	-0.26 (1.19)	0.3 (-0.13, 0.72)	0.171624	0.496482	0 (0.98)	0.07 (-0.61, 0.76)	0.831571	0.991981	-0.06 (0.6)	0.04 (-0.36, 0.45)	0.834127	0.942988	0.36 (0.81)	-0.4 (-0.98, 0.17)	0.164872	0.786484	0.16 (0.63)	-0.21 (-0.77, 0.35)	0.457833	0.958816	55
Contactin-associated protein-like 2	CNTNAP2	VDNAPDQQNSHPDLAQEEIR	72	Yes	-1.14 (3.49)	1.14 (0.15, 2.13)	0.0248189	0.488571	-1.49 (5.18)	1.4 (0.03, 2.77)	0.0454441	0.291914	0.31 (0.94)	-0.31 (-1.04, 0.42)	0.398341	0.991981	-0.16 (0.74)	0.16 (-0.36, 0.68)	0.540883	0.883178	0.18 (0.94)	-0.43 (-1.12, 0.26)	0.214729	0.786484	0.22 (0.56)	-0.22 (-0.88, 0.43)	0.496525	0.958816	43
Neuronal pentraxin receptor	NPTXR	composite	73	Yes	-0.48 (0.95)	0.5 (0.03, 0.97)	0.0373816	0.488571	-0.54 (1.1)	0.54 (0.11, 0.98)	0.0155285	0.291914	-0.36 (0.97)	0.36 (-0.35, 1.07)	0.317611	0.991981	-0.33 (0.78)	0.29 (-0.13, 0.71)	0.177043	0.821504	-0.07 (0.91)	-0.12 (-0.69, 0.46)	0.685103	0.917616	-0.26 (1.16)	0.1 (-0.5, 0.71)	0.735298	0.958816	55
Neuronal pentraxin-2	NPTX2	composite	74	Yes	-0.7 (0.89)	0.71 (0.25, 1.17)	0.002774	0.488571	-0.61 (1.18)	0.59 (0.15, 1.04)	0.00972822	0.262662	-0.19 (1.04)	0.17 (-0.54, 0.88)	0.631262	0.991981	-0.52 (0.77)	0.39 (-0.02, 0.81)	0.0631202	0.821504	-0.33 (1.06)	0 (-0.59, 0.58)	0.991051	0.995146	-0.61 (1.21)	0.38 (-0.2, 0.97)	0.192403	0.958816	55
Vascular endothelial growth factor	VEGFA	single	75	No	-0.44 (1.02)	0.51 (0.05, 0.97)	0.0307027	0.488571	-0.32 (1.11)	0.39 (-0.02, 0.8)	0.0633678	0.320591	-0.3 (0.95)	0.38 (-0.32, 1.09)	0.281332	0.991981	NA	NA	NA	NA	NA	NA	NA	NA	NA	NA	NA	NA	0
ProSAAS	PCSK1	composite	76	Yes	-0.4 (0.84)	0.46 (0.01, 0.91)	0.0455279	0.488571	-0.46 (1.33)	0.51 (0.05, 0.96)	0.0305474	0.291914	-0.26 (1.2)	0.34 (-0.4, 1.08)	0.366172	0.991981	-0.4 (0.84)	0.38 (-0.04, 0.8)	0.078858	0.821504	-0.08 (1.1)	-0.06 (-0.65, 0.53)	0.835947	0.94044	-0.38 (1.11)	0.29 (-0.29, 0.86)	0.321887	0.958816	55
VPS10 domain-containing receptor SorCS1	SORCS1	TIAVYEEFR	77	Yes	-0.52 (1.1)	0.58 (0.09, 1.07)	0.0208791	0.488571	-0.52 (1.42)	0.53 (0.04, 1.01)	0.0337954	0.291914	0.03 (1.15)	0.03 (-0.72, 0.78)	0.933776	0.992086	-0.08 (0.87)	0.06 (-0.38, 0.5)	0.774517	0.921579	0.35 (0.99)	-0.56 (-1.15, 0.03)	0.0602136	0.677562	0.02 (0.95)	-0.08 (-0.64, 0.48)	0.769741	0.958816	55
Monokine induced by gamma interferon	CXCL9	single	78	No	0.14 (1.04)	-0.08 (-0.56, 0.4)	0.746222	0.908476	-0.3 (1.41)	0.33 (-0.14, 0.8)	0.161778	0.485335	0.11 (0.74)	-0.01 (-0.71, 0.7)	0.988232	0.996433	NA	NA	NA	NA	NA	NA	NA	NA	NA	NA	NA	NA	0
Trefoil factor 3	TFF3	single	79	No	-0.35 (0.82)	0.43 (-0.01, 0.87)	0.0576139	0.488571	-0.39 (1.02)	0.45 (0.04, 0.85)	0.0299225	0.291914	-0.12 (0.76)	0.23 (-0.47, 0.92)	0.52001	0.991981	NA	NA	NA	NA	NA	NA	NA	NA	NA	NA	NA	NA	0
Cell surface glycoprotein MUC18	MCAM	composite	80	Yes	-0.37 (0.99)	0.43 (-0.03, 0.89)	0.0684132	0.488571	-0.49 (1.36)	0.52 (0.06, 0.98)	0.0287116	0.291914	0 (0.95)	0.06 (-0.64, 0.77)	0.864709	0.991981	-0.18 (0.72)	0.15 (-0.28, 0.57)	0.494931	0.875598	0.17 (0.84)	-0.14 (-0.72, 0.44)	0.637333	0.905684	-0.12 (1.03)	0.03 (-0.58, 0.65)	0.918592	0.974808	55
Exostosin-like 2	EXTL2	VIVVWNNIGEK	81	Yes	-0.31 (0.88)	0.37 (-0.08, 0.82)	0.10228	0.489592	-0.35 (1.03)	0.41 (0.01, 0.82)	0.046219	0.291914	-0.03 (1.3)	0.06 (-0.67, 0.79)	0.865358	0.991981	-0.14 (0.78)	0.09 (-0.34, 0.51)	0.683	0.921579	0.15 (0.98)	-0.27 (-0.87, 0.32)	0.364638	0.796954	-0.05 (0.98)	-0.06 (-0.66, 0.55)	0.85276	0.958816	55
Fibromodulin	FMOD	YLPFVPSR	82	Yes	-0.24 (0.77)	0.28 (-0.16, 0.73)	0.210181	0.582232	-0.36 (0.93)	0.42 (0.01, 0.82)	0.0426868	0.291914	-0.2 (0.92)	0.18 (-0.51, 0.88)	0.601533	0.991981	0.28 (0.81)	-0.44 (-0.87, 0)	0.0496614	0.821504	0.29 (1.07)	-0.63 (-1.23, -0.02)	0.0418982	0.677562	0.04 (0.75)	-0.09 (-0.68, 0.51)	0.768094	0.958816	55
Dystroglycan	DAG1	composite	83	Yes	-0.3 (0.91)	0.38 (-0.05, 0.81)	0.0862807	0.488571	-0.35 (1.11)	0.4 (0, 0.8)	0.047318	0.291914	-0.06 (1)	0.16 (-0.52, 0.84)	0.639426	0.991981	-0.2 (0.73)	0.22 (-0.21, 0.65)	0.321164	0.821504	0.43 (0.9)	-0.51 (-1.1, 0.09)	0.0949655	0.735944	0.15 (0.6)	-0.2 (-0.76, 0.37)	0.490727	0.958816	55
Cell adhesion molecule 3	CADM3	composite	84	Yes	-0.27 (0.86)	0.33 (-0.11, 0.76)	0.14307	0.511263	-0.42 (1.02)	0.46 (0.06, 0.87)	0.0249018	0.291914	-0.06 (0.9)	0.13 (-0.55, 0.82)	0.698994	0.991981	-0.19 (0.66)	0.19 (-0.23, 0.61)	0.363602	0.875598	0.22 (0.91)	-0.23 (-0.83, 0.37)	0.440261	0.803047	-0.02 (1.02)	-0.08 (-0.7, 0.54)	0.803901	0.958816	55
Receptor-type tyrosine-protein phosphatase-like N	PTPRN	composite	85	Yes	-0.37 (0.96)	0.42 (-0.04, 0.88)	0.0750977	0.488571	-0.44 (1.11)	0.46 (0.03, 0.88)	0.0350986	0.291914	-0.25 (0.96)	0.3 (-0.4, 1)	0.397703	0.991981	-0.33 (0.85)	0.37 (-0.08, 0.81)	0.103021	0.821504	0 (1.15)	-0.11 (-0.74, 0.52)	0.734298	0.930489	-0.1 (1.02)	0.04 (-0.56, 0.65)	0.884823	0.964179	55
Pigment epithelium-derived factor	SERPINF1	composite	86	Yes	-0.34 (0.84)	0.39 (-0.03, 0.82)	0.0703984	0.488571	-0.57 (1.3)	0.63 (0.18, 1.08)	0.00700431	0.262662	-0.06 (1.13)	0.06 (-0.65, 0.77)	0.867199	0.991981	0.13 (0.93)	-0.24 (-0.69, 0.22)	0.303433	0.821504	0.15 (1.21)	-0.18 (-0.84, 0.48)	0.589926	0.895501	-0.18 (0.92)	0.2 (-0.42, 0.81)	0.521166	0.958816	55
Neurosecretory protein VGF	VGF	composite	87	Yes	-0.28 (0.93)	0.32 (-0.16, 0.79)	0.188987	0.581314	-0.43 (1.12)	0.44 (0, 0.88)	0.0476772	0.291914	-0.4 (1.11)	0.46 (-0.28, 1.2)	0.219393	0.991981	-0.41 (0.88)	0.42 (-0.01, 0.85)	0.0553681	0.821504	-0.12 (1.19)	-0.02 (-0.64, 0.6)	0.94387	0.960594	-0.37 (1)	0.31 (-0.26, 0.87)	0.280356	0.958816	55
Peptidyl-glycine alpha-amidating monooxygenase	PAM	composite	88	Yes	-0.3 (0.94)	0.35 (-0.11, 0.82)	0.134201	0.508675	-0.43 (1.17)	0.45 (0.01, 0.89)	0.0428452	0.291914	-0.09 (1.04)	0.17 (-0.55, 0.89)	0.634808	0.991981	-0.31 (0.81)	0.33 (-0.1, 0.75)	0.128489	0.821504	0.18 (1.06)	-0.24 (-0.85, 0.37)	0.4337	0.803047	-0.09 (0.94)	0.06 (-0.52, 0.64)	0.826415	0.958816	55
Thrombomodulin	THBD	single	89	No	0.03 (1.22)	0.04 (-0.44, 0.53)	0.86165	0.939799	-0.36 (1.24)	0.44 (0.01, 0.88)	0.0461372	0.291914	-0.29 (1.11)	0.38 (-0.3, 1.07)	0.270359	0.991981	NA	NA	NA	NA	NA	NA	NA	NA	NA	NA	NA	NA	0
Alpha-1-antitrypsin	SERPINA1	AVLTIDEK	90	Yes	-0.68 (2.96)	0.67 (-0.19, 1.53)	0.126473	0.489592	-0.09 (1.83)	0.12 (-0.47, 0.7)	0.69589	0.877633	-0.15 (0.6)	0.06 (-0.64, 0.75)	0.871997	0.991981	0.21 (0.7)	-0.11 (-0.53, 0.31)	0.604491	0.921579	0.24 (0.77)	-0.09 (-0.66, 0.49)	0.765244	0.933473	-0.16 (1.4)	0.3 (-0.38, 0.98)	0.381273	0.958816	51
CD59 glycoprotein	CD59	AGLQVYNK	91	Yes	-0.35 (1.14)	0.42 (-0.07, 0.91)	0.0918672	0.488571	-0.31 (1.13)	0.36 (-0.07, 0.78)	0.0961729	0.383115	-0.16 (0.94)	0.26 (-0.47, 0.98)	0.481222	0.991981	-0.14 (0.74)	0.17 (-0.27, 0.61)	0.439944	0.875598	0.33 (0.88)	-0.28 (-0.88, 0.31)	0.341801	0.786484	0.05 (0.68)	-0.06 (-0.64, 0.52)	0.837154	0.958816	55
N-acetyllactosaminide beta-1,3-N-acetylglucosaminyltransferase	B4GAT1	composite	92	Yes	-0.36 (0.93)	0.42 (-0.03, 0.87)	0.0681506	0.488571	-0.24 (1.19)	0.25 (-0.19, 0.69)	0.263478	0.588577	0.18 (1)	-0.11 (-0.81, 0.59)	0.760916	0.991981	-0.11 (0.74)	0.12 (-0.3, 0.54)	0.581053	0.905102	0.27 (0.79)	-0.34 (-0.91, 0.22)	0.227894	0.786484	0.16 (1.02)	-0.28 (-0.88, 0.32)	0.359575	0.958816	55
CD40 antigen	CD40	single	93	No	-0.08 (0.89)	0.17 (-0.27, 0.61)	0.450499	0.732262	-0.19 (1.03)	0.21 (-0.18, 0.6)	0.283666	0.594231	-0.24 (0.66)	0.45 (-0.21, 1.1)	0.177243	0.991981	NA	NA	NA	NA	NA	NA	NA	NA	NA	NA	NA	NA	0
Complement C1q subcomponent subunit B	C1QB	composite	94	Yes	-0.06 (0.98)	0.18 (-0.24, 0.6)	0.389361	0.70085	0.04 (1.12)	0.06 (-0.32, 0.43)	0.771942	0.919813	0.08 (1.03)	0.07 (-0.57, 0.7)	0.835835	0.991981	-0.29 (0.72)	0.38 (-0.05, 0.8)	0.0809395	0.821504	0.36 (1.29)	-0.26 (-0.94, 0.42)	0.44758	0.803047	-0.1 (0.66)	0.22 (-0.35, 0.79)	0.443416	0.958816	55
Golgi membrane protein 1	GOLM1	QQLQALSEPQPR	95	No	-0.08 (0.96)	0.11 (-0.37, 0.59)	0.636145	0.862162	-0.24 (0.88)	0.27 (-0.13, 0.66)	0.188318	0.502871	0.05 (1.08)	0.04 (-0.69, 0.77)	0.922658	0.992086	NA	NA	NA	NA	NA	NA	NA	NA	NA	NA	NA	NA	0
Amyloid beta A4 protein	APP	LVFFAEDVGSNK	96	Yes	-0.1 (0.81)	0.13 (-0.34, 0.59)	0.588758	0.822231	-0.32 (1.05)	0.34 (-0.09, 0.78)	0.119239	0.409038	-0.08 (1.06)	0.11 (-0.63, 0.85)	0.763568	0.991981	-0.49 (0.99)	0.51 (0.04, 0.97)	0.0327814	0.821504	0.19 (1.12)	-0.34 (-0.99, 0.31)	0.303449	0.786484	0.07 (1.4)	-0.25 (-0.95, 0.45)	0.482377	0.958816	51
Amyloid beta-38	APP	single	97	Yes	-0.12 (0.92)	0.14 (-0.33, 0.61)	0.56221	0.79893	-0.35 (0.88)	0.32 (-0.09, 0.73)	0.119275	0.409038	-0.33 (1.02)	0.38 (-0.34, 1.11)	0.295139	0.991981	-0.51 (1.08)	0.79 (0.31, 1.27)	0.00162575	0.268364	0.08 (0.98)	0.07 (-0.53, 0.67)	0.81625	0.937574	0.35 (1.02)	-0.3 (-0.93, 0.32)	0.331289	0.958816	55
Amyloid beta-40	APP	single	98	Yes	-0.16 (0.99)	0.18 (-0.29, 0.65)	0.452855	0.732262	-0.29 (0.93)	0.28 (-0.14, 0.69)	0.186241	0.50285	-0.11 (1.05)	0.18 (-0.54, 0.91)	0.617817	0.991981	-0.52 (1.12)	0.78 (0.29, 1.27)	0.00220876	0.268364	0.18 (0.91)	-0.08 (-0.67, 0.52)	0.802551	0.937574	0.45 (0.86)	-0.47 (-1.07, 0.14)	0.126932	0.958816	55
Prostaglandin-H2 D-isomerase	PTGDS	composite	99	Yes	-0.33 (1.04)	0.43 (-0.02, 0.88)	0.0583644	0.488571	-0.2 (1.07)	0.27 (-0.13, 0.66)	0.182516	0.502804	0.24 (1.05)	-0.12 (-0.81, 0.57)	0.730086	0.991981	-0.02 (0.71)	0.07 (-0.35, 0.49)	0.73911	0.921579	0.59 (0.78)	-0.57 (-1.15, 0)	0.0509712	0.677562	0.39 (0.64)	-0.4 (-0.97, 0.17)	0.167271	0.958816	55
Tumor necrosis factor receptor superfamily member 21	TNFRSF21	ASNLIGTYR	100	Yes	-0.07 (1.07)	0.11 (-0.38, 0.61)	0.648923	0.862494	-0.17 (0.96)	0.19 (-0.23, 0.6)	0.373437	0.663159	-0.1 (1.07)	0.18 (-0.56, 0.92)	0.627748	0.991981	-0.14 (0.85)	0.14 (-0.3, 0.58)	0.520425	0.875598	0.39 (1.14)	-0.48 (-1.11, 0.15)	0.135405	0.786484	0.12 (0.96)	-0.14 (-0.73, 0.46)	0.643271	0.958816	55
SPARC-like protein 1	SPARCL1	composite	101	Yes	-0.13 (0.85)	0.17 (-0.27, 0.61)	0.444018	0.732262	-0.15 (0.94)	0.17 (-0.22, 0.56)	0.394937	0.680637	0.08 (0.93)	-0.03 (-0.72, 0.66)	0.93072	0.992086	-0.1 (0.74)	0.07 (-0.33, 0.47)	0.713638	0.921579	0.34 (1.1)	-0.5 (-1.1, 0.11)	0.105506	0.735944	0.06 (0.85)	-0.1 (-0.67, 0.46)	0.714155	0.958816	55
Fibulin-1	FBLN1	composite	102	Yes	-0.24 (0.81)	0.31 (-0.08, 0.7)	0.120028	0.489592	-0.19 (0.88)	0.25 (-0.1, 0.6)	0.153615	0.478083	-0.09 (1.11)	0.14 (-0.5, 0.77)	0.67264	0.991981	0.09 (0.71)	-0.13 (-0.54, 0.28)	0.529878	0.875921	0.35 (0.97)	-0.34 (-0.96, 0.27)	0.264912	0.786484	0.15 (0.6)	-0.1 (-0.68, 0.47)	0.713871	0.958816	55
Neurexin-3	NRXN3	composite	103	Yes	-0.43 (0.99)	0.46 (-0.01, 0.93)	0.053635	0.488571	-0.34 (1.11)	0.33 (-0.11, 0.76)	0.135665	0.451598	-0.09 (0.95)	0.1 (-0.6, 0.81)	0.773955	0.991981	-0.16 (0.77)	0.12 (-0.29, 0.53)	0.555215	0.893492	0.17 (0.81)	-0.33 (-0.89, 0.22)	0.235927	0.786484	0.07 (1)	-0.2 (-0.77, 0.38)	0.496995	0.958816	55
Protein FAM3C	FAM3C	composite	104	Yes	-0.19 (0.9)	0.22 (-0.23, 0.68)	0.327153	0.631191	-0.28 (0.88)	0.29 (-0.1, 0.68)	0.143529	0.464095	-0.15 (0.79)	0.2 (-0.48, 0.88)	0.565266	0.991981	-0.18 (0.8)	0.17 (-0.25, 0.6)	0.420067	0.875598	0.35 (1.02)	-0.47 (-1.07, 0.14)	0.126788	0.786484	0.1 (1.05)	-0.22 (-0.82, 0.38)	0.470546	0.958816	55
Poliovirus receptor-related protein 1	NECTIN1	ITQVTWQK	105	Yes	-0.17 (1.1)	0.21 (-0.29, 0.7)	0.413316	0.71231	-0.15 (1.38)	0.17 (-0.32, 0.65)	0.503902	0.747617	-0.18 (1.03)	0.2 (-0.54, 0.94)	0.595647	0.991981	-0.18 (0.68)	0.2 (-0.2, 0.61)	0.327002	0.827725	0.3 (0.84)	-0.32 (-0.89, 0.25)	0.267255	0.786484	0.16 (0.68)	-0.17 (-0.72, 0.38)	0.53908	0.958816	55
Neurocan core protein	NCAN	composite	106	Yes	-0.33 (0.86)	0.36 (-0.1, 0.82)	0.126931	0.489592	-0.19 (1)	0.2 (-0.22, 0.62)	0.34752	0.644636	-0.04 (1.05)	0.08 (-0.65, 0.8)	0.837342	0.991981	-0.14 (0.89)	0.16 (-0.28, 0.61)	0.472499	0.875598	0.22 (0.92)	-0.27 (-0.85, 0.3)	0.343074	0.786484	0.08 (1.1)	-0.15 (-0.75, 0.45)	0.609385	0.958816	55
Neuronal cell adhesion molecule	NRCAM	composite	107	Yes	-0.22 (0.89)	0.26 (-0.2, 0.72)	0.256137	0.612677	-0.26 (1.02)	0.27 (-0.15, 0.69)	0.209742	0.509674	-0.14 (0.95)	0.19 (-0.53, 0.9)	0.60475	0.991981	-0.23 (0.76)	0.24 (-0.18, 0.66)	0.263771	0.821504	0.24 (0.83)	-0.34 (-0.9, 0.23)	0.238302	0.786484	0.03 (0.95)	-0.08 (-0.66, 0.51)	0.794017	0.958816	55
Neogenin	NEO1	DVVASLVSTR	108	Yes	-0.33 (0.97)	0.4 (-0.07, 0.86)	0.0958012	0.488571	-0.19 (1.22)	0.23 (-0.22, 0.68)	0.308255	0.629461	-0.02 (1.05)	0.06 (-0.68, 0.8)	0.873596	0.991981	-0.17 (0.73)	0.14 (-0.28, 0.56)	0.510094	0.875598	0.24 (0.79)	-0.35 (-0.92, 0.22)	0.219867	0.786484	0.1 (1.03)	-0.2 (-0.81, 0.41)	0.509557	0.958816	55
Neural cell adhesion molecule 1	NCAM1	composite	109	Yes	-0.21 (0.88)	0.27 (-0.19, 0.72)	0.25075	0.612677	-0.17 (1.11)	0.2 (-0.22, 0.63)	0.344018	0.644636	-0.08 (0.91)	0.14 (-0.58, 0.85)	0.707675	0.991981	-0.14 (0.7)	0.12 (-0.3, 0.53)	0.570467	0.905102	0.34 (0.9)	-0.44 (-1.03, 0.14)	0.13531	0.786484	0.1 (0.87)	-0.19 (-0.77, 0.4)	0.521231	0.958816	55
Cadherin-13	CDH13	composite	110	Yes	-0.09 (1.04)	0.13 (-0.34, 0.61)	0.583883	0.820136	-0.17 (1.19)	0.19 (-0.25, 0.63)	0.386428	0.678671	0.05 (1.11)	-0.02 (-0.74, 0.71)	0.966321	0.995943	-0.16 (0.95)	0.27 (-0.18, 0.72)	0.232625	0.821504	0.18 (0.92)	-0.14 (-0.71, 0.43)	0.61971	0.895501	0.19 (1.14)	-0.18 (-0.8, 0.43)	0.555469	0.958816	55
Latrophilin-1	ADGRL1	LVVSQLNPYTLR	111	Yes	-0.36 (1)	0.42 (-0.06, 0.9)	0.0857087	0.488571	-0.21 (1.21)	0.22 (-0.24, 0.67)	0.347406	0.644636	-0.17 (1.03)	0.22 (-0.51, 0.96)	0.546453	0.991981	-0.25 (0.7)	0.22 (-0.19, 0.63)	0.291207	0.821504	0.25 (0.93)	-0.35 (-0.94, 0.24)	0.242984	0.786484	0.07 (0.78)	-0.14 (-0.71, 0.42)	0.616573	0.958816	55
Calsyntenin-1	CLSTN1	composite	112	Yes	-0.21 (0.92)	0.26 (-0.21, 0.73)	0.277936	0.615354	-0.14 (1.08)	0.15 (-0.28, 0.58)	0.483069	0.738275	0.15 (0.93)	-0.09 (-0.81, 0.63)	0.805677	0.991981	-0.12 (0.86)	0.08 (-0.35, 0.51)	0.711659	0.921579	0.27 (1)	-0.34 (-0.94, 0.25)	0.255484	0.786484	-0.03 (1.07)	-0.09 (-0.69, 0.52)	0.775558	0.958816	55
Voltage-dependent calcium channel subunit alpha-2 delta-1	CACNA2D1	composite	113	Yes	-0.33 (0.85)	0.37 (-0.09, 0.83)	0.11585	0.489592	-0.34 (1.07)	0.35 (-0.08, 0.78)	0.11208	0.404165	-0.15 (0.93)	0.19 (-0.52, 0.91)	0.591955	0.991981	-0.13 (0.87)	0.15 (-0.29, 0.59)	0.503124	0.875598	0.29 (0.89)	-0.42 (-0.99, 0.15)	0.14336	0.786484	0.02 (0.92)	-0.07 (-0.64, 0.5)	0.796739	0.958816	55
Neuronal growth regulator 1	NEGR1	composite	114	Yes	-0.37 (0.9)	0.4 (-0.06, 0.87)	0.0878658	0.488571	-0.29 (1.17)	0.28 (-0.16, 0.73)	0.206437	0.509674	0.01 (0.94)	0 (-0.71, 0.72)	0.993996	0.997425	-0.16 (0.73)	0.14 (-0.27, 0.56)	0.492641	0.875598	0.17 (0.8)	-0.29 (-0.85, 0.27)	0.304127	0.786484	0.13 (1.06)	-0.26 (-0.86, 0.34)	0.395205	0.958816	55
Beta-nerve growth factor	NGF	SAPAAAIAAR	115	No	0.22 (1.17)	-0.18 (-0.69, 0.33)	0.488266	0.75094	0.24 (1.21)	-0.21 (-0.65, 0.23)	0.351133	0.646404	0.49 (1.13)	-0.47 (-1.21, 0.28)	0.215222	0.991981	NA	NA	NA	NA	NA	NA	NA	NA	NA	NA	NA	NA	0
Seizure 6-like protein	SEZ6L	composite	116	Yes	-0.27 (0.88)	0.32 (-0.14, 0.78)	0.172492	0.558004	-0.26 (1.07)	0.28 (-0.15, 0.71)	0.194572	0.508399	-0.08 (0.97)	0.14 (-0.58, 0.87)	0.695351	0.991981	-0.25 (0.84)	0.3 (-0.14, 0.74)	0.184879	0.821504	0.23 (0.91)	-0.29 (-0.87, 0.29)	0.323006	0.786484	0.01 (1.14)	-0.1 (-0.72, 0.53)	0.759912	0.958816	55
Glutamate receptor 4	GRM4	composite	117	No	-0.35 (0.94)	0.35 (-0.11, 0.82)	0.136065	0.508675	-0.23 (1.3)	0.21 (-0.26, 0.67)	0.37388	0.663159	-0.18 (0.78)	0.15 (-0.54, 0.84)	0.665208	0.991981	NA	NA	NA	NA	NA	NA	NA	NA	NA	NA	NA	NA	0
Protein kinase C-binding protein NELL2	NELL2	composite	118	Yes	-0.31 (0.9)	0.34 (-0.13, 0.8)	0.152294	0.528677	-0.25 (0.98)	0.26 (-0.15, 0.67)	0.20682	0.509674	0 (1.01)	0.04 (-0.68, 0.76)	0.917504	0.992086	-0.19 (0.81)	0.21 (-0.2, 0.63)	0.313985	0.821504	0.15 (0.93)	-0.24 (-0.81, 0.32)	0.393301	0.803047	-0.05 (1.08)	-0.01 (-0.61, 0.58)	0.961008	0.987755	55
Cholecystokinin	CCK	composite	119	Yes	0.06 (0.92)	-0.01 (-0.46, 0.44)	0.974515	0.983237	-0.14 (1.07)	0.17 (-0.25, 0.58)	0.428963	0.719592	-0.12 (1.01)	0.22 (-0.48, 0.91)	0.5365	0.991981	-0.17 (0.88)	0.26 (-0.19, 0.72)	0.252498	0.821504	0.11 (1.4)	-0.12 (-0.83, 0.59)	0.739316	0.930489	0.24 (0.65)	-0.22 (-0.79, 0.35)	0.432715	0.958816	54
Secretogranin-1	CHGB	composite	120	Yes	-0.16 (0.77)	0.16 (-0.27, 0.59)	0.461325	0.732262	-0.33 (0.89)	0.33 (-0.05, 0.72)	0.0913314	0.379139	-0.32 (0.9)	0.37 (-0.31, 1.04)	0.281312	0.991981	-0.18 (0.72)	0.08 (-0.34, 0.5)	0.694245	0.921579	0.12 (0.89)	-0.2 (-0.79, 0.39)	0.491955	0.823377	-0.2 (1.21)	0.01 (-0.63, 0.65)	0.979625	0.987755	55
Secretogranin-2	SCG2	composite	121	Yes	-0.28 (0.94)	0.31 (-0.16, 0.78)	0.187941	0.581314	-0.29 (1.09)	0.32 (-0.1, 0.74)	0.138011	0.453197	-0.13 (1.11)	0.2 (-0.53, 0.93)	0.584482	0.991981	-0.29 (0.78)	0.31 (-0.11, 0.72)	0.146614	0.821504	0.15 (1.08)	-0.25 (-0.85, 0.36)	0.422582	0.803047	-0.15 (1.09)	0.1 (-0.5, 0.7)	0.751512	0.958816	55
Secretogranin-3	SCG3	composite	122	Yes	0.01 (0.92)	0.03 (-0.42, 0.48)	0.892437	0.955209	-0.16 (0.85)	0.19 (-0.19, 0.58)	0.324896	0.644636	-0.15 (0.88)	0.19 (-0.49, 0.87)	0.578361	0.991981	-0.21 (0.87)	0.23 (-0.22, 0.69)	0.316274	0.821504	0.2 (0.96)	-0.25 (-0.86, 0.36)	0.410447	0.803047	-0.03 (0.86)	-0.05 (-0.64, 0.55)	0.872151	0.958972	55
Proenkephalin-B	PDYN	composite	123	Yes	-0.35 (0.69)	0.38 (-0.04, 0.81)	0.0771907	0.488571	-0.29 (1.14)	0.32 (-0.11, 0.74)	0.145149	0.464095	-0.21 (1.36)	0.23 (-0.5, 0.97)	0.526419	0.991981	-0.48 (0.91)	0.4 (-0.06, 0.85)	0.0870825	0.821504	0.15 (1.46)	-0.39 (-1.1, 0.32)	0.276099	0.786484	-0.17 (1.17)	0.08 (-0.56, 0.72)	0.801259	0.958816	55
Chromogranin-A	CHGA	EDSLEAGLPLQVR	124	Yes	-0.15 (0.65)	0.16 (-0.29, 0.61)	0.47327	0.737208	-0.27 (1.15)	0.26 (-0.2, 0.71)	0.262942	0.588577	-0.53 (1.84)	0.57 (-0.26, 1.4)	0.175024	0.991981	-0.21 (0.93)	0.21 (-0.26, 0.69)	0.378299	0.875598	0.21 (0.87)	-0.29 (-0.86, 0.27)	0.304356	0.786484	-0.1 (1.28)	0.06 (-0.64, 0.75)	0.86919	0.958972	50
Inter-alpha-trypsin inhibitor heavy chain H5	ITIH5	SYLEITPSR	125	Yes	-0.41 (0.84)	0.44 (-0.03, 0.9)	0.0642246	0.488571	-0.37 (1.31)	0.4 (-0.09, 0.88)	0.106299	0.397395	0.12 (1.1)	-0.17 (-0.91, 0.57)	0.646716	0.991981	0.03 (0.76)	-0.1 (-0.54, 0.33)	0.638491	0.921579	0.2 (1.15)	-0.34 (-0.99, 0.3)	0.289896	0.786484	0.04 (0.81)	-0.14 (-0.73, 0.46)	0.649077	0.958816	55
Plexin domain-containing protein 1	PLXDC1	LYGPSEPHSR	126	Yes	-0.25 (1.13)	0.27 (-0.24, 0.77)	0.300581	0.615354	-0.15 (1.07)	0.15 (-0.29, 0.59)	0.489614	0.738982	-0.01 (1.02)	-0.01 (-0.74, 0.72)	0.979549	0.995943	0.02 (1.26)	-0.04 (-0.64, 0.55)	0.881121	0.959344	0.17 (0.87)	-0.28 (-0.86, 0.3)	0.343075	0.786484	0.01 (0.74)	0.01 (-0.6, 0.63)	0.967459	0.987755	50
Protein CutA	CUTA	TQSSLVPALTDFVR	127	Yes	-0.29 (1.08)	0.36 (-0.12, 0.85)	0.142208	0.511263	-0.28 (1.15)	0.3 (-0.14, 0.74)	0.183972	0.502804	0.45 (0.86)	-0.36 (-1.08, 0.35)	0.315633	0.991981	-0.05 (0.74)	0.02 (-0.4, 0.43)	0.942916	0.966788	0.52 (0.94)	-0.69 (-1.29, -0.1)	0.0227376	0.552523	0.09 (1.1)	-0.22 (-0.84, 0.39)	0.466943	0.958816	55
Protein-L-isoaspartate(D-aspartate) O-methyltransferase	PCMT1	VQLVVGDGR	128	Yes	-0.28 (1.15)	0.32 (-0.18, 0.83)	0.204814	0.582232	-0.19 (1.31)	0.18 (-0.29, 0.66)	0.44311	0.722656	-0.53 (0.97)	0.57 (-0.17, 1.3)	0.126975	0.991981	-0.16 (0.84)	0.22 (-0.22, 0.66)	0.316387	0.821504	0.07 (0.85)	-0.15 (-0.72, 0.42)	0.60454	0.895501	0.14 (1.35)	-0.29 (-0.96, 0.37)	0.377373	0.958816	55
Neuroblastoma suppressor of tumorigenicity 1	NBL1	LALFPDK	129	Yes	-0.31 (0.89)	0.37 (-0.1, 0.83)	0.119128	0.489592	-0.35 (1.09)	0.39 (-0.04, 0.81)	0.0761796	0.340931	-0.05 (1.15)	0.11 (-0.64, 0.86)	0.772086	0.991981	-0.27 (0.82)	0.28 (-0.16, 0.73)	0.208642	0.821504	0.3 (0.99)	-0.33 (-0.94, 0.28)	0.286595	0.786484	0.06 (0.61)	-0.08 (-0.64, 0.49)	0.790874	0.958816	55
Macrophage inflammatory protein 1 beta	CCL4	single	130	No	-0.05 (0.71)	0.08 (-0.37, 0.53)	0.715001	0.908476	0.08 (1.3)	-0.06 (-0.54, 0.41)	0.797942	0.920621	-0.19 (0.69)	0.25 (-0.46, 0.96)	0.491067	0.991981	NA	NA	NA	NA	NA	NA	NA	NA	NA	NA	NA	NA	0
Beta-secretase 1	BACE1	single (ELISA)	131	No	0.14 (0.9)	-0.09 (-0.56, 0.37)	0.688787	0.885583	-0.04 (1.02)	0.03 (-0.41, 0.46)	0.906941	0.937816	0.09 (1.19)	0 (-0.74, 0.74)	0.997425	0.997425	NA	NA	NA	NA	NA	NA	NA	NA	NA	NA	NA	NA	0
AXL receptor tyrosine kinase	AXL	single	132	Yes	-0.2 (0.9)	0.23 (-0.25, 0.7)	0.338689	0.648043	-0.04 (1.21)	0.05 (-0.41, 0.51)	0.827729	0.921541	-0.05 (0.7)	0.09 (-0.62, 0.8)	0.799993	0.991981	-0.19 (0.79)	0.16 (-0.28, 0.6)	0.478117	0.875598	0.18 (0.92)	-0.29 (-0.88, 0.31)	0.338415	0.786484	0.03 (0.64)	-0.07 (-0.64, 0.49)	0.80336	0.958816	55
Carbonic anhydrase 1	CA1	composite	134	Yes	0.08 (0.78)	-0.07 (-0.51, 0.37)	0.759531	0.908476	-0.17 (1.25)	0.17 (-0.28, 0.63)	0.453731	0.725373	-0.3 (1.22)	0.26 (-0.47, 0.99)	0.47435	0.991981	-0.03 (0.82)	0.18 (-0.28, 0.64)	0.441702	0.875598	0.2 (1.25)	-0.11 (-0.8, 0.58)	0.751388	0.931568	-0.26 (0.79)	0.5 (-0.14, 1.15)	0.12454	0.958816	52
Beta-secretase 1	BACE1	SIVDSGTTNLR	135	No	0.2 (0.88)	-0.15 (-0.62, 0.31)	0.514098	0.757851	0.19 (0.96)	-0.17 (-0.59, 0.24)	0.411834	0.69983	0.19 (1.23)	-0.14 (-0.9, 0.62)	0.71782	0.991981	NA	NA	NA	NA	NA	NA	NA	NA	NA	NA	NA	NA	0
Heparin binding EGF like growth factor	HBEGF	single	135	No	-0.28 (1.18)	0.36 (-0.13, 0.85)	0.151629	0.528677	0 (1.11)	0.04 (-0.38, 0.47)	0.840868	0.928777	-0.16 (0.5)	0.33 (-0.32, 0.99)	0.315036	0.991981	NA	NA	NA	NA	NA	NA	NA	NA	NA	NA	NA	NA	0
Thioredoxin-dependent peroxide reductase, mitochondrial	PRDX3	HLSVNDLPVGR	136	No	-0.53 (2)	0.56 (-0.1, 1.23)	0.0939696	0.488571	-0.28 (1.76)	0.32 (-0.24, 0.88)	0.25632	0.588577	0.16 (0.41)	-0.09 (-0.76, 0.59)	0.797456	0.991981	NA	NA	NA	NA	NA	NA	NA	NA	NA	NA	NA	NA	0
Alpha2MacroglobulinA2MacromgmL	A2M	single		No	-0.19 (1.1)	0.29 (-0.17, 0.76)	0.210426	0.582232	-0.14 (1.13)	0.19 (-0.23, 0.61)	0.362767	0.657854	0.64 (1.67)	-0.44 (-1.21, 0.33)	0.259578	0.991981	NA	NA	NA	NA	NA	NA	NA	NA	NA	NA	NA	NA	0
Angiotensin converting enzyme	ACE	single		No	-0.26 (1.08)	0.31 (-0.18, 0.81)	0.212292	0.582232	-0.09 (1.15)	0.12 (-0.32, 0.56)	0.595806	0.832073	-0.11 (0.65)	0.1 (-0.61, 0.81)	0.776549	0.991981	NA	NA	NA	NA	NA	NA	NA	NA	NA	NA	NA	NA	0
Prostatic acid phosphatase	ACPP	single		No	0.05 (0.82)	-0.03 (-0.49, 0.43)	0.905071	0.955209	0.18 (0.88)	-0.16 (-0.57, 0.25)	0.449442	0.725373	0.22 (0.82)	-0.26 (-0.96, 0.45)	0.470809	0.991981	NA	NA	NA	NA	NA	NA	NA	NA	NA	NA	NA	NA	0
Latrophilin-1	ADGRL1	SGETVINTANYHDTSPYR		No	0.09 (0.28)	-0.06 (-0.47, 0.36)	0.788842	0.908476	-0.23 (1.29)	0.24 (-0.24, 0.71)	0.329957	0.644636	0.22 (0.35)	-0.18 (-0.87, 0.52)	0.614443	0.991981	NA	NA	NA	NA	NA	NA	NA	NA	NA	NA	NA	NA	0
Adiponectin	ADIPOQ	single		No	0.01 (1.01)	0 (-0.48, 0.49)	0.988389	0.992473	-0.19 (0.87)	0.21 (-0.2, 0.62)	0.313015	0.633855	0.63 (1.56)	-0.7 (-1.48, 0.08)	0.0779787	0.991981	NA	NA	NA	NA	NA	NA	NA	NA	NA	NA	NA	NA	0
Angiopoietin2ANG2ngmL	ANGPT2	single		No	-0.11 (1.04)	0.15 (-0.32, 0.63)	0.526079	0.760936	0.1 (1.25)	-0.03 (-0.47, 0.41)	0.890713	0.933225	0.28 (0.67)	-0.28 (-0.98, 0.41)	0.415976	0.991981	NA	NA	NA	NA	NA	NA	NA	NA	NA	NA	NA	NA	0
Amyloid-like protein 2	APLP2	composite		No	-0.15 (1.05)	0.19 (-0.28, 0.67)	0.413031	0.71231	-0.03 (1.12)	0.05 (-0.38, 0.48)	0.822389	0.921541	0.33 (0.92)	-0.3 (-1.01, 0.4)	0.388036	0.991981	NA	NA	NA	NA	NA	NA	NA	NA	NA	NA	NA	NA	0
Apolipoprotein B-100	APOB	SVSLPSLDPASAK		No	0.01 (1.09)	-0.01 (-0.51, 0.49)	0.967292	0.983237	-0.01 (0.9)	0.03 (-0.39, 0.45)	0.89098	0.933225	0.16 (0.52)	-0.15 (-0.85, 0.56)	0.681919	0.991981	NA	NA	NA	NA	NA	NA	NA	NA	NA	NA	NA	NA	0
Apolipoprotein B-100	APOB	TGISPLALIK		No	0.21 (0.41)	-0.17 (-0.59, 0.25)	0.421221	0.715781	0.02 (0.68)	0.03 (-0.35, 0.4)	0.885101	0.933225	0.29 (0.74)	-0.24 (-0.93, 0.46)	0.49604	0.991981	NA	NA	NA	NA	NA	NA	NA	NA	NA	NA	NA	NA	0
Apolipoprotein CIII	APOC3	single		No	-0.19 (0.98)	0.2 (-0.28, 0.68)	0.401373	0.706928	-0.29 (0.97)	0.32 (-0.1, 0.75)	0.130563	0.44065	-0.04 (1.03)	-0.02 (-0.74, 0.7)	0.956417	0.995943	NA	NA	NA	NA	NA	NA	NA	NA	NA	NA	NA	NA	0
Apolipoprotein D	APOD	single (RBM)		No	-0.19 (1.07)	0.27 (-0.19, 0.73)	0.240378	0.611708	-0.26 (1.03)	0.33 (-0.07, 0.73)	0.105586	0.397395	0.13 (0.93)	-0.05 (-0.73, 0.63)	0.883346	0.992086	NA	NA	NA	NA	NA	NA	NA	NA	NA	NA	NA	NA	0
Apolipoprotein E	APOE	composite		No	-0.29 (0.82)	0.31 (-0.1, 0.73)	0.139282	0.511263	-0.25 (1.13)	0.28 (-0.14, 0.7)	0.184155	0.502804	-0.07 (0.7)	0.08 (-0.56, 0.71)	0.812246	0.991981	NA	NA	NA	NA	NA	NA	NA	NA	NA	NA	NA	NA	0
Soluble Amyloid beta A4 protein (s-APP beta)	APP	single		No	-0.11 (0.94)	0.06 (-0.41, 0.54)	0.786459	0.908476	-0.15 (1.06)	0.1 (-0.33, 0.52)	0.652587	0.865864	0.21 (1.21)	-0.33 (-1.06, 0.39)	0.360389	0.991981	NA	NA	NA	NA	NA	NA	NA	NA	NA	NA	NA	NA	0
Amyloid beta A4 protein	APP	composite		No	-0.27 (1.08)	0.31 (-0.17, 0.8)	0.200022	0.582232	0.04 (1.04)	-0.03 (-0.46, 0.4)	0.900711	0.935354	0.55 (1.33)	-0.51 (-1.26, 0.24)	0.17985	0.991981	NA	NA	NA	NA	NA	NA	NA	NA	NA	NA	NA	NA	0
Beta-2-microglobulin	B2M	composite		No	-0.14 (0.77)	0.22 (-0.18, 0.62)	0.283145	0.615354	-0.04 (1.28)	0.1 (-0.31, 0.51)	0.626482	0.841078	0.18 (0.98)	-0.04 (-0.7, 0.62)	0.905914	0.992086	NA	NA	NA	NA	NA	NA	NA	NA	NA	NA	NA	NA	0
Brain acid soluble protein 1	BASP1	ETPAATEAPSSTPK		No	-0.19 (1.3)	0.2 (-0.34, 0.73)	0.462999	0.732262	0.05 (0.82)	-0.02 (-0.41, 0.38)	0.937514	0.945294	-0.39 (1.56)	0.41 (-0.37, 1.19)	0.294062	0.991981	NA	NA	NA	NA	NA	NA	NA	NA	NA	NA	NA	NA	0
Complement C3	C3	LSINTHPSQKPLSITVR		No	0.43 (0.18)	-0.41 (-0.82, 0)	0.0502449	0.488571	0.14 (0.79)	-0.08 (-0.47, 0.3)	0.666452	0.866921	0.17 (0.92)	-0.17 (-0.89, 0.55)	0.640133	0.991981	NA	NA	NA	NA	NA	NA	NA	NA	NA	NA	NA	NA	0
Complement C3	C3	VPVAVQGEDTVQSLTQGDGVAK		No	-0.6 (2)	0.6 (-0.06, 1.26)	0.0736165	0.488571	-0.41 (1.44)	0.42 (-0.09, 0.92)	0.105609	0.397395	-0.37 (1.83)	0.46 (-0.37, 1.28)	0.272079	0.991981	NA	NA	NA	NA	NA	NA	NA	NA	NA	NA	NA	NA	0
Complement C4-A	C4A	composite		No	-0.18 (0.96)	0.25 (-0.2, 0.71)	0.272516	0.615354	-0.3 (1.11)	0.36 (-0.06, 0.78)	0.0920542	0.379139	-0.06 (0.85)	0.11 (-0.58, 0.81)	0.740858	0.991981	NA	NA	NA	NA	NA	NA	NA	NA	NA	NA	NA	NA	0
Complement component C8 beta chain	C8B	composite		No	-0.15 (0.65)	0.18 (-0.22, 0.59)	0.371531	0.689176	-0.13 (0.53)	0.18 (-0.15, 0.51)	0.282298	0.594231	-0.04 (0.98)	0.03 (-0.62, 0.67)	0.937777	0.992086	NA	NA	NA	NA	NA	NA	NA	NA	NA	NA	NA	NA	0
Calcitonin	CALCA	single		No	-0.23 (0.97)	0.22 (-0.26, 0.71)	0.367738	0.687387	0.1 (1.03)	-0.11 (-0.54, 0.32)	0.611703	0.833002	0.48 (0.72)	-0.45 (-1.16, 0.27)	0.215579	0.991981	NA	NA	NA	NA	NA	NA	NA	NA	NA	NA	NA	NA	0
Catalase	CAT	LFAYPDTHR		No	0.03 (1.14)	-0.03 (-0.54, 0.48)	0.906094	0.955209	-0.18 (1.91)	0.21 (-0.39, 0.81)	0.494704	0.742056	-0.38 (0.88)	0.31 (-0.41, 1.03)	0.392735	0.991981	NA	NA	NA	NA	NA	NA	NA	NA	NA	NA	NA	NA	0
T lymphocyte secreted protein I309	CCL1	composite		No	0.39 (1.15)	-0.33 (-0.83, 0.17)	0.197359	0.582232	-0.04 (0.86)	0.06 (-0.34, 0.46)	0.775974	0.919813	-0.19 (1.2)	0.32 (-0.41, 1.06)	0.382793	0.991981	NA	NA	NA	NA	NA	NA	NA	NA	NA	NA	NA	NA	0
Chemokine CC4H CC4ngmL	CCL16	single		No	0.04 (0.72)	-0.07 (-0.51, 0.36)	0.738288	0.908476	-0.11 (0.97)	0.16 (-0.26, 0.57)	0.46144	0.728116	-0.21 (0.54)	0.06 (-0.6, 0.72)	0.856122	0.991981	NA	NA	NA	NA	NA	NA	NA	NA	NA	NA	NA	NA	0
MonocyteChemotacticProtein1MCP1pgmL	CCL2	single		No	-0.19 (0.87)	0.26 (-0.19, 0.71)	0.253744	0.612677	0.02 (1.2)	0.07 (-0.35, 0.5)	0.727961	0.907152	-0.3 (0.92)	0.42 (-0.28, 1.11)	0.233669	0.991981	NA	NA	NA	NA	NA	NA	NA	NA	NA	NA	NA	NA	0
T cell specific protein RANTES	CCL5	single		No	0.05 (0.97)	-0.03 (-0.51, 0.46)	0.90819	0.955209	-0.24 (0.63)	0.26 (-0.12, 0.64)	0.171356	0.496482	-0.23 (0.41)	0.26 (-0.44, 0.95)	0.465208	0.991981	NA	NA	NA	NA	NA	NA	NA	NA	NA	NA	NA	NA	0
Monocyte chemotactic protein 2	CCL8	single		No	0 (0.86)	0.05 (-0.41, 0.51)	0.840836	0.932982	-0.05 (1.37)	0.1 (-0.38, 0.59)	0.679796	0.868906	0.24 (0.89)	-0.12 (-0.82, 0.57)	0.726314	0.991981	NA	NA	NA	NA	NA	NA	NA	NA	NA	NA	NA	NA	0
Chromogranin-A (RBM)	CHGA	single		No	-0.02 (0.83)	0.04 (-0.4, 0.48)	0.846037	0.934486	-0.11 (0.76)	0.11 (-0.26, 0.48)	0.56557	0.803705	-0.05 (0.75)	0.1 (-0.56, 0.76)	0.763334	0.991981	NA	NA	NA	NA	NA	NA	NA	NA	NA	NA	NA	NA	0
Secretogranin-1	CHGB	HLEEPGETQNAFLNER		No	0.11 (0.21)	-0.06 (-0.46, 0.35)	0.777835	0.908476	0.08 (0.24)	-0.05 (-0.39, 0.29)	0.772613	0.919813	0.06 (0.38)	0.01 (-0.67, 0.69)	0.96708	0.995943	NA	NA	NA	NA	NA	NA	NA	NA	NA	NA	NA	NA	0
Calsyntenin-3	CLSTN3	composite		No	-0.06 (0.82)	0.06 (-0.37, 0.5)	0.771625	0.908476	0.01 (0.77)	-0.02 (-0.39, 0.35)	0.916352	0.939551	0.13 (0.76)	-0.11 (-0.77, 0.55)	0.738549	0.991981	NA	NA	NA	NA	NA	NA	NA	NA	NA	NA	NA	NA	0
Beta-Ala-His dipeptidase	CNDP1	composite		No	-0.36 (0.77)	0.41 (-0.03, 0.85)	0.0665556	0.488571	-0.15 (1)	0.18 (-0.23, 0.59)	0.388211	0.678671	0.29 (1.03)	-0.25 (-0.96, 0.46)	0.488957	0.991981	NA	NA	NA	NA	NA	NA	NA	NA	NA	NA	NA	NA	0
Contactin-2	CNTN2	composite		No	-0.35 (1.1)	0.41 (-0.06, 0.88)	0.0856183	0.488571	0.09 (1.24)	-0.03 (-0.48, 0.41)	0.878908	0.933225	0.63 (1.18)	-0.58 (-1.3, 0.13)	0.107404	0.991981	NA	NA	NA	NA	NA	NA	NA	NA	NA	NA	NA	NA	0
Contactin-associated protein-like 2	CNTNAP2	YSSSDWVTQYR		No	-0.08 (0.94)	0.09 (-0.39, 0.57)	0.713988	0.908476	0.08 (0.97)	-0.1 (-0.53, 0.32)	0.626468	0.841078	0.31 (1.42)	-0.32 (-1.1, 0.46)	0.416335	0.991981	NA	NA	NA	NA	NA	NA	NA	NA	NA	NA	NA	NA	0
Contactin-associated protein-like 2	CNTNAP2	HELQHPIIAR		No	-0.25 (1.05)	0.25 (-0.25, 0.75)	0.319907	0.626915	-0.15 (1.2)	0.12 (-0.34, 0.58)	0.613611	0.833002	0.22 (1.2)	-0.27 (-1.02, 0.47)	0.470193	0.991981	NA	NA	NA	NA	NA	NA	NA	NA	NA	NA	NA	NA	0
Macrophage colony stimulating factor 1	CSF1	single		No	-0.11 (0.82)	0.17 (-0.28, 0.62)	0.452897	0.732262	0.15 (1.14)	-0.09 (-0.51, 0.33)	0.680709	0.868906	-0.19 (0.66)	0.24 (-0.46, 0.94)	0.495865	0.991981	NA	NA	NA	NA	NA	NA	NA	NA	NA	NA	NA	NA	0
Di-N-acetylchitobiase	CTBS	ATYIQNYR		No	-0.12 (0.91)	0.16 (-0.31, 0.62)	0.501127	0.757851	-0.06 (1.05)	0.09 (-0.34, 0.52)	0.667137	0.866921	0.53 (1.11)	-0.52 (-1.27, 0.22)	0.162876	0.991981	NA	NA	NA	NA	NA	NA	NA	NA	NA	NA	NA	NA	0
Cathepsin D	CTSD	composite		No	-0.25 (0.83)	0.28 (-0.14, 0.71)	0.181461	0.572661	-0.13 (0.7)	0.14 (-0.21, 0.49)	0.436228	0.719592	0.22 (0.91)	-0.19 (-0.84, 0.46)	0.55686	0.991981	NA	NA	NA	NA	NA	NA	NA	NA	NA	NA	NA	NA	0
Cathepsin L1	CTSL	VFQEPLFYEAPR		No	-0.35 (1.07)	0.39 (-0.1, 0.89)	0.115073	0.489592	-0.45 (1.32)	0.45 (-0.03, 0.93)	0.0683977	0.327307	0.28 (0.95)	-0.27 (-1, 0.46)	0.464552	0.991981	NA	NA	NA	NA	NA	NA	NA	NA	NA	NA	NA	NA	0
Interleukin 8	CXCL8	LWEGSTSR		No	-0.05 (1.02)	0.09 (-0.39, 0.57)	0.721543	0.908476	0.2 (1.89)	-0.12 (-0.7, 0.46)	0.673578	0.868906	0.24 (1.26)	-0.28 (-1.02, 0.46)	0.44773	0.991981	NA	NA	NA	NA	NA	NA	NA	NA	NA	NA	NA	NA	0
Gamma-enolase	ENO2	LGAEVYHTLK		No	0.3 (0.58)	-0.23 (-0.65, 0.19)	0.284563	0.615354	-0.21 (2.67)	0.27 (-0.49, 1.03)	0.486618	0.738982	0.5 (0.83)	-0.38 (-1.08, 0.32)	0.282115	0.991981	NA	NA	NA	NA	NA	NA	NA	NA	NA	NA	NA	NA	0
Ectonucleotide pyrophosphatase phosphodiesterase family member 2	ENPP2	composite		No	0.08 (0.83)	-0.06 (-0.49, 0.37)	0.77144	0.908476	-0.02 (0.9)	0.03 (-0.35, 0.42)	0.864659	0.933225	0.19 (0.72)	-0.17 (-0.81, 0.47)	0.597771	0.991981	NA	NA	NA	NA	NA	NA	NA	NA	NA	NA	NA	NA	0
Tissue factor	F3	single		No	-0.1 (0.92)	0.17 (-0.28, 0.62)	0.443186	0.732262	0 (1.12)	0.04 (-0.39, 0.47)	0.848838	0.929301	0.17 (0.72)	-0.1 (-0.8, 0.59)	0.764833	0.991981	NA	NA	NA	NA	NA	NA	NA	NA	NA	NA	NA	NA	0
Fas ligand	FASLG	single		No	0.31 (1.36)	-0.27 (-0.81, 0.26)	0.313011	0.620478	0.37 (2.06)	-0.32 (-0.95, 0.3)	0.307695	0.629461	-0.13 (1.15)	0.13 (-0.62, 0.88)	0.729337	0.991981	NA	NA	NA	NA	NA	NA	NA	NA	NA	NA	NA	NA	0
Fibrinogen	FGA	single		No	0 (1.22)	0.04 (-0.47, 0.54)	0.887454	0.955209	0.1 (1.04)	-0.05 (-0.48, 0.38)	0.814537	0.921541	0.26 (0.98)	-0.22 (-0.93, 0.49)	0.540535	0.991981	NA	NA	NA	NA	NA	NA	NA	NA	NA	NA	NA	NA	0
Follicle stimulating hormone	FSHB	single		No	-0.16 (0.97)	0.11 (-0.32, 0.53)	0.621761	0.853604	-0.12 (0.84)	0.05 (-0.32, 0.42)	0.799387	0.920621	0.28 (1.35)	-0.35 (-1, 0.3)	0.292666	0.991981	NA	NA	NA	NA	NA	NA	NA	NA	NA	NA	NA	NA	0
Serum glutamic oxaloacetic transaminase	GOT1	single (RBM)		No	0.14 (0.66)	-0.15 (-0.6, 0.3)	0.507421	0.757851	-0.06 (0.81)	0.07 (-0.34, 0.47)	0.744967	0.911786	0.07 (0.79)	-0.05 (-0.76, 0.67)	0.89995	0.992086	NA	NA	NA	NA	NA	NA	NA	NA	NA	NA	NA	NA	0
Glutamate receptor 4	GRM4	EYPGSETPPK		No	-0.05 (0.79)	0.07 (-0.4, 0.53)	0.776923	0.908476	-0.04 (0.75)	0.03 (-0.36, 0.43)	0.870225	0.933225	-0.02 (1.11)	0.09 (-0.65, 0.82)	0.813059	0.991981	NA	NA	NA	NA	NA	NA	NA	NA	NA	NA	NA	NA	0
Hemoglobin subunit alpha	HBA1	composite		No	0.05 (1.1)	-0.06 (-0.55, 0.44)	0.817937	0.928779	0.07 (0.98)	-0.08 (-0.5, 0.34)	0.700168	0.877633	-0.08 (0.75)	0.07 (-0.63, 0.77)	0.837634	0.991981	NA	NA	NA	NA	NA	NA	NA	NA	NA	NA	NA	NA	0
Hemoglobin subunit beta	HBB	composite		No	0 (0.98)	0 (-0.47, 0.47)	0.995729	0.995729	0.03 (0.9)	-0.04 (-0.45, 0.36)	0.829541	0.921541	-0.12 (0.72)	0.09 (-0.6, 0.78)	0.793291	0.991981	NA	NA	NA	NA	NA	NA	NA	NA	NA	NA	NA	NA	0
Intercellular adhesion Molecule 1	ICAM1	single		No	-0.36 (0.93)	0.41 (-0.06, 0.87)	0.0842812	0.488571	-0.32 (1.1)	0.38 (-0.05, 0.8)	0.0830305	0.360293	-0.33 (1.03)	0.38 (-0.32, 1.08)	0.280963	0.991981	NA	NA	NA	NA	NA	NA	NA	NA	NA	NA	NA	NA	0
Insulin-like growth factor-binding protein 2	IGFBP2	composite		No	-0.24 (0.63)	0.32 (-0.05, 0.69)	0.0892192	0.488571	-0.1 (0.89)	0.18 (-0.15, 0.51)	0.270152	0.594231	0.61 (1.27)	-0.53 (-1.18, 0.12)	0.111261	0.991981	NA	NA	NA	NA	NA	NA	NA	NA	NA	NA	NA	NA	0
Immunoglobulin A	IGHA1	single		No	-0.05 (0.81)	0.06 (-0.36, 0.49)	0.763961	0.908476	-0.13 (0.92)	0.21 (-0.18, 0.59)	0.282641	0.594231	0.17 (0.99)	-0.25 (-0.91, 0.4)	0.445362	0.991981	NA	NA	NA	NA	NA	NA	NA	NA	NA	NA	NA	NA	0
Immunoglobulin superfamily member 8	IGSF8	composite		No	-0.21 (0.91)	0.27 (-0.18, 0.72)	0.241393	0.611708	-0.08 (0.94)	0.12 (-0.27, 0.51)	0.539871	0.776977	-0.03 (0.91)	0.09 (-0.6, 0.79)	0.787937	0.991981	NA	NA	NA	NA	NA	NA	NA	NA	NA	NA	NA	NA	0
Interleukin 16	IL16	single		No	0.08 (0.79)	-0.02 (-0.46, 0.42)	0.91781	0.957201	-0.12 (1.27)	0.19 (-0.25, 0.63)	0.394887	0.680637	-0.42 (1.16)	0.44 (-0.28, 1.15)	0.225224	0.991981	NA	NA	NA	NA	NA	NA	NA	NA	NA	NA	NA	NA	0
Interleukin-18-binding protein	IL18BP	single		No	-0.2 (0.86)	0.26 (-0.2, 0.71)	0.266051	0.615354	-0.14 (1.1)	0.19 (-0.23, 0.61)	0.371355	0.663159	0.34 (0.94)	-0.28 (-1, 0.44)	0.445122	0.991981	NA	NA	NA	NA	NA	NA	NA	NA	NA	NA	NA	NA	0
Interleukin 25	IL25	single		No	0.24 (1.08)	-0.16 (-0.63, 0.32)	0.513059	0.757851	0.19 (0.99)	-0.16 (-0.58, 0.26)	0.460222	0.728116	-0.29 (0.78)	0.44 (-0.24, 1.12)	0.19815	0.991981	NA	NA	NA	NA	NA	NA	NA	NA	NA	NA	NA	NA	0
Interleukin 6 receptor	IL6R	single		No	-0.43 (1.03)	0.48 (-0.01, 0.96)	0.0535929	0.488571	-0.23 (1.17)	0.25 (-0.2, 0.69)	0.27636	0.594231	-0.2 (0.7)	0.23 (-0.49, 0.94)	0.524816	0.991981	NA	NA	NA	NA	NA	NA	NA	NA	NA	NA	NA	NA	0
Stem cell factor	KITLG	single		No	0.08 (0.7)	-0.05 (-0.5, 0.39)	0.808267	0.923031	-0.06 (0.95)	0.11 (-0.3, 0.51)	0.607943	0.833002	-0.28 (0.97)	0.28 (-0.45, 1.01)	0.447824	0.991981	NA	NA	NA	NA	NA	NA	NA	NA	NA	NA	NA	NA	0
Kallikrein-10	KLK10	ALQLPYR		No	-0.26 (0.91)	0.36 (-0.07, 0.79)	0.0985185	0.488571	0.01 (0.83)	0.06 (-0.31, 0.43)	0.763735	0.919813	0.6 (0.71)	-0.48 (-1.14, 0.17)	0.147484	0.991981	NA	NA	NA	NA	NA	NA	NA	NA	NA	NA	NA	NA	0
Kallikrein-11	KLK11	LPHTLR		No	-0.12 (1.31)	0.17 (-0.36, 0.7)	0.525693	0.760936	0 (1.06)	0.02 (-0.42, 0.46)	0.931201	0.942841	0.03 (1.5)	-0.03 (-0.8, 0.73)	0.930412	0.992086	NA	NA	NA	NA	NA	NA	NA	NA	NA	NA	NA	NA	0
Kallikrein-6	KLK6	composite		No	-0.06 (0.89)	0.1 (-0.34, 0.54)	0.641282	0.862162	0.08 (0.81)	-0.06 (-0.43, 0.32)	0.764781	0.919813	0.24 (0.76)	-0.18 (-0.84, 0.48)	0.582847	0.991981	NA	NA	NA	NA	NA	NA	NA	NA	NA	NA	NA	NA	0
Neural cell adhesion molecule L1	L1CAM	composite		No	-0.28 (0.83)	0.31 (-0.13, 0.76)	0.161062	0.536138	-0.26 (1.11)	0.27 (-0.16, 0.7)	0.209617	0.509674	0.15 (1.04)	-0.13 (-0.84, 0.57)	0.707477	0.991981	NA	NA	NA	NA	NA	NA	NA	NA	NA	NA	NA	NA	0
Laminin subunit beta-2	LAMB2	AQGIAQGAIR		No	-0.32 (0.99)	0.4 (-0.07, 0.87)	0.0962825	0.488571	-0.33 (1.36)	0.38 (-0.08, 0.84)	0.104344	0.397395	-0.02 (1.3)	0.08 (-0.69, 0.84)	0.844408	0.991981	NA	NA	NA	NA	NA	NA	NA	NA	NA	NA	NA	NA	0
Neutrophil gelatinase associated lipocal	LCN2	single		No	0.06 (1.27)	0.01 (-0.48, 0.5)	0.970702	0.983237	-0.02 (1.25)	0.11 (-0.3, 0.53)	0.587502	0.825219	0.42 (1.28)	-0.36 (-1.06, 0.35)	0.318069	0.991981	NA	NA	NA	NA	NA	NA	NA	NA	NA	NA	NA	NA	0
Leucine-rich repeat-containing protein 4B	LRRC4B	composite		No	-0.32 (0.94)	0.36 (-0.1, 0.82)	0.119339	0.489592	-0.09 (1.23)	0.08 (-0.37, 0.53)	0.734173	0.907182	0.29 (0.9)	-0.28 (-0.97, 0.42)	0.431539	0.991981	NA	NA	NA	NA	NA	NA	NA	NA	NA	NA	NA	NA	0
Latent-transforming growth factor beta-binding protein 2	LTBP2	EQDAPVAGLQPVER		No	0.43 (1.19)	-0.35 (-0.84, 0.14)	0.159546	0.536138	-0.24 (1.06)	0.28 (-0.14, 0.7)	0.183854	0.502804	0.41 (1.48)	-0.27 (-1.04, 0.49)	0.477049	0.991981	NA	NA	NA	NA	NA	NA	NA	NA	NA	NA	NA	NA	0
Melanotransferrin	MELTF	ADTDGGLIFR		No	-0.42 (0.84)	0.39 (-0.07, 0.86)	0.0940074	0.488571	-0.14 (0.7)	0.12 (-0.27, 0.51)	0.539843	0.776977	0.12 (0.44)	-0.13 (-0.82, 0.56)	0.710221	0.991981	NA	NA	NA	NA	NA	NA	NA	NA	NA	NA	NA	NA	0
MatrixMetalloproteinase2MMP2ngmL	MMP2	single		No	0.34 (1.02)	-0.31 (-0.8, 0.18)	0.213245	0.582232	0.13 (1.35)	-0.11 (-0.6, 0.37)	0.64258	0.857951	-0.61 (1.4)	0.68 (-0.1, 1.45)	0.0851544	0.991981	NA	NA	NA	NA	NA	NA	NA	NA	NA	NA	NA	NA	0
MatrixMetalloproteinase3MMP3ngmL	MMP3	single		No	-0.23 (1.28)	0.3 (-0.18, 0.77)	0.216272	0.583935	-0.03 (1.19)	0.09 (-0.35, 0.53)	0.682967	0.868906	0.52 (0.94)	-0.51 (-1.19, 0.16)	0.133965	0.991981	NA	NA	NA	NA	NA	NA	NA	NA	NA	NA	NA	NA	0
Myelin-oligodendrocyte glycoprotein	MOG	VVHLYR		No	-0.18 (1)	0.25 (-0.23, 0.72)	0.299944	0.615354	0.02 (0.95)	0.02 (-0.39, 0.42)	0.929329	0.942841	0.42 (1.06)	-0.33 (-1.06, 0.4)	0.36306	0.991981	NA	NA	NA	NA	NA	NA	NA	NA	NA	NA	NA	NA	0
Neural cell adhesion molecule 2	NCAM2	composite		No	-0.17 (0.84)	0.23 (-0.21, 0.66)	0.307419	0.617378	-0.1 (1.09)	0.14 (-0.28, 0.56)	0.504902	0.747617	0.29 (0.89)	-0.23 (-0.92, 0.47)	0.515062	0.991981	NA	NA	NA	NA	NA	NA	NA	NA	NA	NA	NA	NA	0
LectinLikeOxidizedLDLReceptor1LOXngmL	OLR1	single		No	-0.13 (0.76)	0.2 (-0.25, 0.64)	0.378889	0.695934	0.08 (0.95)	-0.05 (-0.46, 0.36)	0.817842	0.921541	0.41 (1.09)	-0.32 (-1.06, 0.42)	0.388179	0.991981	NA	NA	NA	NA	NA	NA	NA	NA	NA	NA	NA	NA	0
Papilin	PAPLN	VHQSPDGTLLIYNLR		No	-0.2 (0.98)	0.27 (-0.19, 0.73)	0.254394	0.612677	-0.2 (1.45)	0.27 (-0.2, 0.74)	0.264012	0.588577	0.17 (1.18)	-0.13 (-0.85, 0.59)	0.719901	0.991981	NA	NA	NA	NA	NA	NA	NA	NA	NA	NA	NA	NA	0
PregnancyAssociatedPlasmaProteinAPmIUmL	PAPPA	single		No	-0.22 (1.22)	0.25 (-0.23, 0.74)	0.303879	0.615354	0.02 (1.67)	0.05 (-0.49, 0.58)	0.862833	0.933225	0.15 (1.02)	-0.16 (-0.87, 0.55)	0.647333	0.991981	NA	NA	NA	NA	NA	NA	NA	NA	NA	NA	NA	NA	0
Placenta growth factor	PGF	single		No	-0.22 (0.95)	0.3 (-0.12, 0.72)	0.160307	0.536138	-0.13 (0.79)	0.22 (-0.12, 0.56)	0.201855	0.509674	-0.01 (0.7)	0.09 (-0.52, 0.7)	0.772	0.991981	NA	NA	NA	NA	NA	NA	NA	NA	NA	NA	NA	NA	0
Pancreatic polypeptide	PPY	single		No	0.25 (0.99)	-0.21 (-0.69, 0.27)	0.387321	0.70085	0.18 (1.03)	-0.15 (-0.57, 0.27)	0.470523	0.733063	0.71 (1.09)	-0.62 (-1.36, 0.11)	0.0964897	0.991981	NA	NA	NA	NA	NA	NA	NA	NA	NA	NA	NA	NA	0
Peroxiredoxin-1	PRDX1	composite		No	-0.12 (1.18)	0.19 (-0.31, 0.68)	0.451314	0.732262	-0.1 (1.04)	0.13 (-0.28, 0.55)	0.525144	0.768735	0.44 (1.14)	-0.43 (-1.16, 0.29)	0.24005	0.991981	NA	NA	NA	NA	NA	NA	NA	NA	NA	NA	NA	NA	0
Peroxiredoxin-2	PRDX2	composite		No	0.02 (1.17)	0.01 (-0.5, 0.52)	0.975144	0.983237	0.05 (0.9)	-0.05 (-0.46, 0.37)	0.827156	0.921541	-0.01 (0.54)	0.01 (-0.69, 0.72)	0.972827	0.995943	NA	NA	NA	NA	NA	NA	NA	NA	NA	NA	NA	NA	0
Peroxiredoxin-6	PRDX6	composite		No	0.05 (1.04)	-0.03 (-0.47, 0.41)	0.906876	0.955209	-0.01 (0.94)	0.04 (-0.34, 0.41)	0.848991	0.929301	0.05 (0.7)	-0.08 (-0.69, 0.53)	0.794254	0.991981	NA	NA	NA	NA	NA	NA	NA	NA	NA	NA	NA	NA	0
Prolactin	PRL	single		No	0.1 (0.68)	-0.11 (-0.56, 0.34)	0.634999	0.862162	-0.03 (0.8)	0.03 (-0.37, 0.43)	0.872028	0.933225	0.1 (0.93)	-0.19 (-0.91, 0.53)	0.592548	0.991981	NA	NA	NA	NA	NA	NA	NA	NA	NA	NA	NA	NA	0
Alpha-1-antitrypsin	SERPINA1	SVLGQLGITK		No	0.13 (1.31)	-0.13 (-0.66, 0.41)	0.642186	0.862162	0.12 (0.74)	-0.1 (-0.5, 0.29)	0.606555	0.833002	-0.04 (0.59)	0.04 (-0.67, 0.74)	0.91963	0.992086	NA	NA	NA	NA	NA	NA	NA	NA	NA	NA	NA	NA	0
Alpha-1-antitrypsin	SERPINA1	single (RBM)		No	-0.16 (1.22)	0.19 (-0.32, 0.7)	0.466362	0.732262	-0.18 (1.34)	0.23 (-0.24, 0.7)	0.33133	0.644636	-0.63 (0.75)	0.61 (-0.07, 1.29)	0.0773363	0.991981	NA	NA	NA	NA	NA	NA	NA	NA	NA	NA	NA	NA	0
Alpha-1-antitrypsin	SERPINA1	LSITGTYDLK		No	0.29 (0.5)	-0.3 (-0.73, 0.13)	0.163697	0.537544	0.27 (0.34)	-0.28 (-0.64, 0.07)	0.119513	0.409038	-0.44 (1.76)	0.5 (-0.3, 1.3)	0.217712	0.991981	NA	NA	NA	NA	NA	NA	NA	NA	NA	NA	NA	NA	0
Alpha-1-antichymotrypsin	SERPINA3	composite		No	-0.19 (1.05)	0.28 (-0.19, 0.74)	0.237725	0.611708	-0.26 (1.02)	0.35 (-0.04, 0.73)	0.0771211	0.340931	0.24 (1.3)	-0.18 (-0.87, 0.52)	0.612509	0.991981	NA	NA	NA	NA	NA	NA	NA	NA	NA	NA	NA	NA	0
Plasminogen activator inhibitor 1	SERPINE1	single		No	0.13 (0.89)	-0.06 (-0.52, 0.4)	0.787111	0.908476	-0.01 (1.09)	0.06 (-0.36, 0.47)	0.783678	0.920621	0.84 (1.33)	-0.74 (-1.49, 0.01)	0.0524442	0.991981	NA	NA	NA	NA	NA	NA	NA	NA	NA	NA	NA	NA	0
Neuroserpin	SERPINI1	composite		No	-0.29 (0.93)	0.3 (-0.17, 0.78)	0.209108	0.582232	-0.29 (1.09)	0.27 (-0.17, 0.71)	0.22763	0.542294	0.1 (0.84)	-0.1 (-0.81, 0.61)	0.78882	0.991981	NA	NA	NA	NA	NA	NA	NA	NA	NA	NA	NA	NA	0
SexHormoneBindingGlobulinSHBGnmolL	SHBG	single		No	-0.17 (0.73)	0.17 (-0.28, 0.62)	0.460192	0.732262	-0.19 (0.99)	0.21 (-0.22, 0.63)	0.339711	0.644636	-0.49 (1.4)	0.45 (-0.32, 1.21)	0.251765	0.991981	NA	NA	NA	NA	NA	NA	NA	NA	NA	NA	NA	NA	0
Sialate O-acetylesterase	SIAE	ELSNTAAYQSVR		No	-0.16 (0.86)	0.16 (-0.32, 0.63)	0.512327	0.757851	-0.2 (0.92)	0.16 (-0.25, 0.57)	0.43827	0.719592	0.23 (0.81)	-0.27 (-0.98, 0.45)	0.459636	0.991981	NA	NA	NA	NA	NA	NA	NA	NA	NA	NA	NA	NA	0
SLIT and NTRK-like protein 1	SLITRK1	SLPVDVFAGVSLSK		No	0.11 (0.39)	-0.09 (-0.52, 0.33)	0.66344	0.866753	-0.12 (1.3)	0.15 (-0.33, 0.62)	0.540366	0.776977	-0.52 (2.49)	0.55 (-0.39, 1.48)	0.249128	0.991981	NA	NA	NA	NA	NA	NA	NA	NA	NA	NA	NA	NA	0
Alpha synuclein	SNCA	single		No	0.2 (1.64)	-0.18 (-0.78, 0.41)	0.541537	0.77408	0.09 (0.84)	-0.09 (-0.5, 0.32)	0.666621	0.866921	0.11 (0.37)	-0.14 (-0.84, 0.55)	0.682825	0.991981	NA	NA	NA	NA	NA	NA	NA	NA	NA	NA	NA	NA	0
Superoxide dismutase [Cu-Zn]	SOD1	HVGDLGNVTADK		No	0 (0.95)	0.04 (-0.42, 0.51)	0.85373	0.938717	-0.03 (0.85)	0.04 (-0.35, 0.44)	0.827113	0.921541	0.17 (0.96)	-0.09 (-0.8, 0.62)	0.797847	0.991981	NA	NA	NA	NA	NA	NA	NA	NA	NA	NA	NA	NA	0
Superoxide dismutase [Cu-Zn]	SOD1	composite		No	0.05 (0.91)	-0.03 (-0.5, 0.45)	0.911969	0.955209	0.1 (0.92)	-0.08 (-0.5, 0.34)	0.700661	0.877633	-0.52 (0.92)	0.52 (-0.21, 1.25)	0.159316	0.991981	NA	NA	NA	NA	NA	NA	NA	NA	NA	NA	NA	NA	0
Extracellular superoxide dismutase [Cu-Zn]	SOD3	composite		No	-0.01 (0.66)	0.03 (-0.35, 0.41)	0.865002	0.939799	0.11 (0.92)	-0.05 (-0.4, 0.3)	0.785491	0.920621	-0.12 (0.79)	0.08 (-0.53, 0.69)	0.791408	0.991981	NA	NA	NA	NA	NA	NA	NA	NA	NA	NA	NA	NA	0
Spondin-1	SPON1	VTLSAAPPSYFR		No	-0.37 (0.96)	0.44 (-0.02, 0.9)	0.062229	0.488571	-0.15 (1.16)	0.21 (-0.22, 0.64)	0.336411	0.644636	0.14 (1.23)	-0.09 (-0.83, 0.66)	0.81765	0.991981	NA	NA	NA	NA	NA	NA	NA	NA	NA	NA	NA	NA	0
Transforming growth factor beta-1	TGFA	LLAPSDSPEWLSFDVTGVVR		No	-0.45 (1.84)	0.49 (-0.14, 1.12)	0.122777	0.489592	-0.52 (1.62)	0.51 (-0.02, 1.05)	0.0600125	0.320591	-0.31 (1.59)	0.46 (-0.32, 1.24)	0.246898	0.991981	NA	NA	NA	NA	NA	NA	NA	NA	NA	NA	NA	NA	0
Transforming growth factor alpha	TGFB1	single		No	0.29 (0.91)	-0.27 (-0.75, 0.2)	0.257173	0.612677	-1.26 (7.44)	1.41 (-0.52, 3.34)	0.150868	0.476115	0.04 (0.71)	-0.07 (-0.78, 0.63)	0.833159	0.991981	NA	NA	NA	NA	NA	NA	NA	NA	NA	NA	NA	NA	0
Tumor necrosis factor receptor 2	TNFRSF1B	single		No	-0.06 (0.78)	0.15 (-0.27, 0.58)	0.476961	0.738226	0 (0.83)	0.06 (-0.31, 0.43)	0.735452	0.907182	0.35 (1.05)	-0.19 (-0.89, 0.51)	0.587823	0.991981	NA	NA	NA	NA	NA	NA	NA	NA	NA	NA	NA	NA	0
TNF related apoptosis inducing ligand	TNFSF10	single		No	0 (0.9)	0.05 (-0.42, 0.52)	0.828405	0.930011	0.19 (1.24)	-0.16 (-0.61, 0.28)	0.472574	0.733063	-0.01 (0.87)	0.11 (-0.6, 0.83)	0.750214	0.991981	NA	NA	NA	NA	NA	NA	NA	NA	NA	NA	NA	NA	0
Transthyretin	TTR	composite		No	-0.1 (0.69)	0.12 (-0.3, 0.54)	0.573866	0.810753	0.15 (0.83)	-0.14 (-0.52, 0.24)	0.476642	0.733063	0.6 (0.63)	-0.57 (-1.22, 0.09)	0.087816	0.991981	NA	NA	NA	NA	NA	NA	NA	NA	NA	NA	NA	NA	0
Polyubiquitin-B	UBB	composite		No	-0.14 (0.95)	0.19 (-0.28, 0.66)	0.417333	0.714168	0.04 (0.96)	-0.01 (-0.43, 0.4)	0.944782	0.948686	0.04 (1.3)	0.03 (-0.72, 0.78)	0.939011	0.992086	NA	NA	NA	NA	NA	NA	NA	NA	NA	NA	NA	NA	0
Vasorin	VASN	composite		No	-0.14 (0.99)	0.22 (-0.22, 0.67)	0.314069	0.620478	-0.01 (1.21)	0.07 (-0.35, 0.49)	0.746689	0.911786	0.33 (1.02)	-0.23 (-0.93, 0.46)	0.502802	0.991981	NA	NA	NA	NA	NA	NA	NA	NA	NA	NA	NA	NA	0
Vascular cell adhesion molecule 1	VCAM1	single		No	-0.24 (0.94)	0.31 (-0.14, 0.77)	0.17452	0.558004	0.06 (1.46)	0.03 (-0.44, 0.5)	0.888439	0.933225	0.47 (1.19)	-0.38 (-1.1, 0.34)	0.292576	0.991981	NA	NA	NA	NA	NA	NA	NA	NA	NA	NA	NA	NA	0
von Willebrand factor	VWF	single		No	0.13 (0.84)	-0.07 (-0.51, 0.38)	0.773289	0.908476	-0.15 (1.1)	0.17 (-0.23, 0.58)	0.401368	0.686847	0.08 (0.95)	0.06 (-0.65, 0.77)	0.863398	0.991981	NA	NA	NA	NA	NA	NA	NA	NA	NA	NA	NA	NA	0
Cancer antigen 199		single		No	-0.05 (0.73)	0.06 (-0.39, 0.51)	0.788007	0.908476	0.03 (0.83)	-0.02 (-0.43, 0.39)	0.915723	0.939551	-0.61 (0.69)	0.58 (-0.12, 1.29)	0.103833	0.991981	NA	NA	NA	NA	NA	NA	NA	NA	NA	NA	NA	NA	0
Golgi membrane protein 1	GOLM1	DQLVIPDGQEEEQEAAGEGR		No	-0.02 (0.61)	0.03 (-0.41, 0.46)	0.898	0.955209	-0.01 (1.01)	-0.01 (-0.44, 0.41)	0.948803	0.948803	0.32 (0.7)	-0.29 (-0.99, 0.41)	0.41517	0.991981	NA	NA	NA	NA	NA	NA	NA	NA	NA	NA	NA	NA	0
Cortisol		single		No	-0.13 (1.18)	0.21 (-0.29, 0.7)	0.404374	0.706928	-0.02 (1.05)	0.06 (-0.36, 0.48)	0.788331	0.920621	0.08 (1.89)	-0.08 (-0.91, 0.76)	0.856226	0.991981	NA	NA	NA	NA	NA	NA	NA	NA	NA	NA	NA	NA	0
Isoprostaan		single		No	0.12 (0.94)	-0.14 (-0.56, 0.28)	0.51459	0.757851	0.11 (0.88)	-0.11 (-0.47, 0.26)	0.554081	0.79201	0.36 (0.97)	-0.39 (-1.01, 0.23)	0.208991	0.991981	NA	NA	NA	NA	NA	NA	NA	NA	NA	NA	NA	NA	0

## Sheet: Supplementary table 3
Supplementary table 3. Annotation of proteins that showed an association with abnormal amyloid.
Protein	Figure annotation	Gene functional annotation	Cell production type	Synaptic protein	Top KEGG/GO pathway
Apolipoprotein E _LGADMEDVR	Alzheimer’s disease	Cell metabolism	Astrocyte	x	5010: Alzheimer’s disease
Nicastrin	Alzheimer’s disease	Peptide neurotrophin signaling	n.r.	x	05010 Alzheimer's disease
Tau	Injury markers	Structural plasticity	Neuronal	x	4012: ErbB signaling pathway
Neurogranin	Injury markers	Intracellular signal transduction	Neuronal	x	GO:0051343
					positive regulation of cyclic-nucleotide phosphodiesterase activity
Fatty acid−binding protein, heart	Injury markers	n.r.	Zhang neuron		3320
					PPAR signaling pathway
Visinin-like protein 1	Injury markers	Intracellular signal transduction	n.r.	x	4020
					Calcium signaling pathway
Chitinase 3 like protein 1	Injury markers	n.r.	n.r.		511
					Other glycan degradation
Neurofilament light	Injury markers	Structural plasticity	Neuronal		n.r.
Osteopontin	Extracellular matrix	n.r.	Zhang Oligodendrocyte		04512: ECM-receptor interaction
			Zhang microglia
Fibroblast Growth Factor 4	Cell adhesion	n.r.	Astrocyte		04015 Rap1 signaling pathway
Hepatocyte Growth Factor	Cell adhesion	n.r.	n.r.		04015 Rap1 signaling pathway
Gamma enolase.GNPTVEVDLYTAK	Glyconeogenesis	Cell metabolism	Astrocyte	x	00010 Glycolysis / Gluconeogenesis
			Zhang neuron
			Zhang astrocytes
			Zhang oligodendrocytes
Fructose bisphosphate aldolase A	Glyconeogenesis	n.r.	Zhang astrocytes		00010 Glycolysis / Gluconeogenesis
			Zhang endothelia
Pyruvate kinase isozymes M1 M2	Glyconeogenesis	n.r.	n.r.		00010 Glycolysis / Gluconeogenesis
Aspartate aminotransferase, mitochondrial	Glyconeogenesis	n.r.	Oligodendrocyte		00270 Cysteine and methionine metabolism
Aspartate aminotransferase, cytoplasmic	Glyconeogenesis	Cell metabolism	Oligodendrocyte	x	00270 Cysteine and methionine metabolism
Agouti Related Protein	Signaling	n.r.	n.r.		GO:0007218 neuropeptide signaling pathway
S100 calcium binding protein B	Immune system	n.r.	Zhang astrocytes		GO:0045087 Innate immuneresponse
			Zhang oligodendrocytes
			Zhang neuron
Apolipoprotein B 100.IAELSATAQEIIK	Lipid transport	n.r.	n.r.		GO:0097006 Regulation of plasma lipoprotein particle levels
					GO:0006869 Lipid transport
Apolipoprotein D.VLNQELR	Lipid transport	n.r.	Oligodendrocyte		GO:000686 lipid transport
			Zhang neuron
			Zhang oligodendrocyte
			Zhang astrocyte
Apolipoprotein aL	Lipid transport	n.r.	n.r.		GO:000686 lipid transport
Endothelin 1	Cell adhesion	n.r.	Astrocyte	x	04668 TNF signalling pathway
Glial fibrillary acidic protein	Cell adhesion	n.r.	Zhang astrocytes		No direct biological pathway enrichment
Sortilin	Cell adhesion	n.r.	n.r.		04722 Neurotrophin signaling pathway
Resistin	Glyconeogenesis	n.r.	Astrocyte		4152
					AMPK signaling pathway
N-terminal prohormone of brain natriuretic	Signaling	n.r.	Oligodendrocytes	x	4022 cGMP-PKG signaling pathway
Macrophage Migration Inhibitory Factor	Metabolic pathways	Peptide neurotrophin signaling	n.r.	x	00360 Phenylalanine metabolism
Leptin	Signaling	n.r.	n.r.		0492: Adipocytokine signaling pathway
Thyroxine Binding Globulin	Signaling	n.r.	n.r.		GO:0010817 Regulation of hormone levels
Inter alpha trypsin inhibitor heavy chain H1	Proteolysis	n.r.	n.r.		GO:0030162 Regulation of proteolysis
Protein AMBP	Proteolysis	n.r.	n.r.		GO:0045861 Negative regulation of proteolysis
Cystatin C	Extracellular matrix	n.r.	Zhang astrocytes	x	GO:0030198 Extracellular matrix organisation
			Zhang neuron
			Zhang microglia
Metalloproteinase inhibitor 1	Extracellular matrix	n.r.	n.r.		GO:0030198 Extracellular matrix organisation
Leucine rich alpha 2 glycoprotein	Cell adhesion	n.r.	Astrocyte		GO:0048871 Multicellular organismal homeostasis
Serum Amyloid P Component	Immune system	n.r.	n.r.		GO:0006953 Acute-phase response
Apolipoprotein H	Immune system	n.r.	n.r.		GO:0030195 Negative regulation of blood coagulation
N acetylmuramoyl L alanine amidase	Immune system	n.r.	Microglia		No direct biological pathway enrichment
Myoglobin	Immune system	n.r.	-	x	No direct biological pathway enrichment
Complement C3.TGLQEVEVK	Immune system	n.r.	Neuronal		04610: Complement and coagulation cascade
			Zhang microglia
Factor H	Immune system	n.r.	-		04610: Complement and coagulation cascade
C reactive protein	Immune system	n.r.	Oligodendrocyte		GO:0006953 Acute-phase response
Interferon gamma Induced Protein 10	Immune system	n.r.	n.r.		04062: Chemokine signaling pathway
Apolipoprotein E.CLAVYQAGAR	Alzheimer’s disease	Cell metabolism	Astrocyte	x	5010: Alzheimer’s disease
Interleukin 3	Immune system	n.r.	n.r.		04630: Jak-STAT signaling pathway
Apolipoprotein AI	Lipid transport	n.r.	n.r.		03320: PPAR signaling pathway;
Alpha 2 HS glycoprotein	Immune system	n.r.	Zhang astrocytes		GO:0006953 Acute-phase response
			Zhang endothelia
Ceruloplasmin	Immune system	n.r.	n.r.		GO: Transition metal ion homeostasis
Alpha 1B glycoprotein	Immune system	n.r.	n.r.		04610: Complement and coagulation cascade
Afamin	Immune system	n.r.	n.r.		No direct biological pathway enrichment
Complement C2	Immune system	n.r.	Neuronal		04610: Complement and coagulation cascade
Complement C3	Immune system	n.r.	Neuronal		04610: Complement and coagulation cascade
			Zhang microglia
Complement C5	Immune system	n.r.	n.r.		04610: Complement and coagulation cascade
Complement component C6	Immune system	n.r.	n.r.		04610: Complement and coagulation cascade
Complement factor B	Immune system	n.r.	n.r.		04610: Complement and coagulation cascade
Prothrombin	Immune system	n.r.	n.r.		04610: Complement and coagulation cascade
Plasminogen	Immune system	n.r.	Astrocyte	x	04610: Complement and coagulation cascade
Hemopexin	Immune system	n.r.	n.r.		GO:0006898 Receptor-mediated endocytosis
Kininogen 1	Immune system	n.r.	n.r.		04610: Complement and coagulation cascade
Vitamin D binding protein	Metabolic pathways	n.r.	n.r.		GO: vitamin D metabolic process
Mimecan	Metabolic pathways	n.r.	n.r.		GO:0018146 keratan sulfate biosynthetic process
Kallistatin	Proteolysis	n.r.	n.r.		GO:0030162 Regulation of proteolysis
Monocyte differentiation antigen CD14	Immune system	n.r.	n.r.		0462 Toll-like receptor signaling pathway
Clusterin	Immune system	n.r.	Microglia		GO:0002576 Platelet degranulation
			Zhang astrocytes
Ferritin	Immune system	n.r.	Zhang astrocytes		GO:0006892 post-Golgi vesicle mediated transport
			Zhang microglia
			Zhang oligodendrocytes
			Zhang endoth
			Zhang neuron
Biotinidase	Metabolic pathways	n.r.	Astrocyte		GO:0006768 biotin metabolic process
EGF containing fibulin like extracellular matrix protein 1	Extracellular matrix	n.r.	Zhang astrocytes		GO:0030198 Extracellular matrix organisation
Cochlin	Extracellular matrix	n.r.	n.r.		No direct biological pathway enrichment
Neuronal pentraxin 1	Cell adhesion	Intracellular signal transduction	n.r.	x	No direct biological pathway enrichment
Neurexin 1	Cell adhesion	Cell adhesion and transsynaptic signaling	Neuronal	x	04514: Cell adhesion molecules
			Zhang Neuron
			Zhang astrocyte
Neurexin 2	Cell adhesion	Cell adhesion and transsynaptic signaling	Neuronal	x	04514: Cell adhesion molecules
			Zhang Neuron
Contactin 1	Cell adhesion	Cell adhesion and transsynaptic signaling	Zhang neuron	x	04514: Cell adhesion molecules
Contactin associated protein like 2.VDNAPDQQNSHPDLAQEEIR	Cell adhesion	Cell adhesion and transsynaptic signaling	Oligodendrocyte	x	04514: Cell adhesion molecules
Neuronal pentraxin receptor	Cell adhesion	Intracellular signal transduction	n.r.		No direct biological pathway enrichment
Neuronal pentraxin 2	Cell adhesion	n.r.	n.r.		00190 Oxidative phosphoylation
Vascular Endothelial Growth Factor	Cell adhesion	n.r.	n.r.		04510 Focal adhesion
Proprotein convertase 1 inhibitor	Signaling	Peptide neurotrophin signaling	n.r.	x	GO:0016486 Peptide hormone signaling
VPS10 domain containing receptor SorCS1	NA	n.r.	n.r.		No direct biological pathway enrichment
Monokine Induced by Gamma Interferon	Immune system	n.r.	Oligodendrocyte		04062: Chemokine signaling pathway
Trefoil Factor 3	Immune system	n.r.	Astrocyte		GO:0006952 Defense response
Cell surface glycoprotein MUC18	Cell adhesion	n.r.	Neuronal	x	GO:0048646 Anatomical structure formation involved in morphogenesis
Exostosin like 2	Metabolic pathways	n.r.	Astrocyte		GO:0030166 Protoglycan biosynthetic process
Fibromodulin	Extracellular matrix	n.r.	Neuronal	x	GO:0018146 keratan sulfate biosynthetic process
Dystroglycan	Extracellular matrix	n.r.	Microglia		04512: ECM-receptor interaction
Cell adhesion molecule 3	Cell adhesion	n.r.	Neuronal		04514: Cell adhesion molecules
Receptor type tyrosine protein phosphatase like N	Cell adhesion	n.r.	Microglia		No direct biological pathway enrichment
Pigment epithelium derived factor	Cell adhesion	n.r.	n.r.		GO:0051130 positive regulation of cellular component organisation
Neurosecretory protein VGF	Cell adhesion	n.r.	n.r.		04722 Neurotrophin signaling pathway
Peptidyl glycine alpha amidating monooxygenase	NA	n.r.	Zhang neuron		No direct biological pathway enrichment
Thrombomodulin	Immune system	n.r.	n.r.		04610: Complement and coagulation cascade
Alpha 1 antitrypsin.AVLTIDEK	Immune system	n.r.	n.r.		04610: Complement and coagulation cascade
CD59 glycoprotein	Immune system	n.r.	Neuronal		04610: Complement and coagulation cascade
N acetyllactosaminide beta 1,3 N acetylglucosaminyltransferase	Immune system	n.r.	Zhang Neuron en Astrocyte		00601: Glycosphingolipid biosynthesis -lacto and neofacto series
CD40 antigen	Immune system	n.r.	n.r.		04064: NF-kappa B signaling pathway
Complement C1q subcomponent subunit	Immune system	n.r.	Neuronal		04610: Complement and coagulation cascade
Golgi membrane protein 1.QQLQALSEPQPR	Immune system	n.r.	Zhang neuron		No direct biological pathway enrichment
			Zhang astrocytes
Amyloid beta A4 protein.LVFFAEDVGSNK	Alzheimer’s disease	n.r.	Oligodendrocyte	x	5010: Alzheimer’s disease
Amyloid beta 38	Alzheimer’s disease	n.r.	Oligodendrocyte	x	5010: Alzheimer’s disease
Amyloid beta 40	Alzheimer’s disease	n.r.	Oligodendrocyte	x	5010: Alzheimer’s disease
Prostaglandin H2 D isomerase	Metabolic pathways	n.r.	Astrocyte		00590: Arachidonic acid metabolism
			Zhang astrocyte
			Zhang oligodendrocyte
			Zhang endoth
Tumor necrosis factor receptor superfamily member 21	Metabolic pathways	n.r.	Astrocyte		GO:0044255 Cellular lipid metabolic process
			Zhang microglia
SPARC like protein 1	Extracellular matrix	n.r.	Astrocyte		04512: ECM-receptor interaction
			Zhang astrocyte
			Zhang neuron
			Zhang oligodendrocyte
			Zhang microglia
Fibulin 1	Extracellular matrix	n.r.	Oligodendrocyte		GO:0030198 Extracellular matrix organisation
Neurexin 3	Cell adhesion	n.r.	Neuronal	x	04514: Cell adhesion molecules
			Zhan Neuron
Protein FAM3C	Cell adhesion	n.r.	Zhang neuron		04510 Focal adhesion
Poliovirus receptor related protein 1	Cell adhesion	Cell adhesion and transsynaptic signaling	Astrocyte	x	04514: Cell adhesion molecules
			zhang astrocyte
Neurocan core protein	Cell adhesion	Cell adhesion and transsynaptic signaling	Zhang astrocytes	x	04514: Cell adhesion molecules
Neuronal cell adhesion molecule	Cell adhesion	Cell adhesion and transsynaptic signaling	n.r.	x	04514: Cell adhesion molecules
Neogenin	Cell adhesion	Cell adhesion and transsynaptic signaling	n.r.	x	GO:0007411 Axon guidance
Neural cell adhesion molecule 1	Cell adhesion	n.r.	Oligodendrocyte	x	GO:0007411 Axon guidance
			Zhang Neuron
			Zhang astrocyte
			Zhang Oligodendrocyte
Cadherin 13	Cell adhesion	Cell adhesion and transsynaptic signaling	Astrocyte	x	GO:0034332 Adherens junction organization
Latrophilin 1.LVVSQLNPYTLR	Cell adhesion	GPCR signaling	n.r.	x	GO:0051965 Positive regulation of synapse assembly
Calsyntenin 1	Cell adhesion	n.r.	zhang neuron		GO0008088: Axon cargo transport
Voltage dependent calcium channel subunit alpha 2 delta 1	Cell adhesion	Excitability	n.r.	x	GO:0070588 Calcium ion transmembrane transport
Neuronal growth regulator 1	Cell adhesion	n.r.	Neuronal	x	No direct biological pathway enrichment
			Zhang neuron
Beta nerve growth factor	Cell adhesion	n.r.	n.r.		04722 Neurotrophin signaling pathway
Seizure 6 like protein	Cell adhesion	n.r.	Astrocyte	x	04010: MAPK signaling pathway
Glutamate receptor 4	Cell adhesion	GPCR signaling	-	x	04080: Neuroactive ligand-receptor interaction
Protein kinase C binding protein NELL2	Cell adhesion	n.r.	n.r.		GO:1902476 Chloride transmembrane transport
Cholecystokinin	Signaling	Peptide neurotrophin signaling	Neuronal	x	GO:0007186: G-protein coupled receptor signaling pathway
			Zhang neuronal
Secretogranin 1	Signaling	n.r.	n.r.		GO:0016486 Peptide hormone signaling
Secretogranin 2	Signaling	Peptide neurotrophin signaling	Oligodendrocyte	x	GO:0016486 Peptide hormone signaling
			Zhang Neuron
Secretogranin 3	Signaling	n.r.	n.r.		No direct biological pathway enrichment
Proenkephalin B	Signaling	Peptide neurotrophin signaling	n.r.	x	GO: GO0007218 Neuropeptide signaling pathway
Chromogranin A.EDSLEAGLPLQVR	Signaling	Peptide neurotrophin signaling	Microglia	x	No direct biological pathway enrichment
Inter alpha trypsin inhibitor heavy chain H5	NA	n.r.	n.r.		No direct biological pathway enrichment
Plexin domain containing protein 1	NA	n.r.	n.r.		No direct biological pathway enrichment
Protein CutA	NA	n.r.	Oligodendrocyte	x	No direct biological pathway enrichment
			Zhang neuron
			Zhang oligodendrocyte
Protein L isoaspartate(D aspartate) O methyltransferase	NA	n.r.	Microglia		No direct biological pathway enrichment
			Zhang neuron
			Zhang astrocyte
			Zhang oligodendrocyte
Neuroblastoma suppressor of tumorigenicity 1	NA	n.r.	n.r.	x	No direct biological pathway enrichment
n.r. is not reported. Functional gene annotation based on Ruano et al., 2010; Cell production type based on Zhang et al., (eb.stanford.edu/group/barres_lab/cgi-bin/geneSearch ) and/or Goudriaan et al., 2014; Synaptic structure indication based on Ruano et al., 2010; Foldy et al., 2016 and GO.

## Sheet: Supplementary table 4
Supplementary table 4. Comparison of sample characteristics between ADNI and EMIF-AD MBD cohorts.
	Control (ε4 non-carrier, normal amyloid , MMS > 27)			APOE ε4 non-carrier, abnormal amyloid MMSE > 27			APOE ε4 non-carrier, abnormal amyloid MMSE 27-24			APOE ε4 non-carrier, abnormal amyloid MMSE <24			APOE ε4 carrier, normal amyloid, MMSE > 27			APOE ε4 carrier, abnormal amyloid MMSE > 27			APOE ε4 carrier, abnormal amyloid MMSE 27-24			APOE ε4 carrier, abnormal amyloid MMSE <24
Characteristic	ADNI	EMIF-AD MBD	P-value	ADNI	EMIF-AD MBD	P-value	ADNI	EMIF-AD MBD	P-value	ADNI	EMIF-AD MBD	P-value	ADNI	EMIF-AD MBD	P-value	ADNI	EMIF-AD MBD	P-value	ADNI	EMIF-AD MBD	P-value	ADNI	EMIF-AD MBD	P-value
Number of individuals	60	43		24	36	NA	34	21	NA	9	16	NA	8	19	NA	40	52	NA	63	54	NA	23	34	NA
APOE alleles: E2/E3	15 (25%)	7 (16%)	0.67415	3 (12%)	7 (19%)	0.672604	6 (18%)	2 (10%)	1	0 (0%)	2 (12%)	NA	0	0	NA	0	0	NA	0	0	NA	0	0	NA
E3/E3	45 (75%)	35 (81%)	0.552995	21 (88%)	28 (78%)	0.836335	28 (82%)	18 (86%)	0.681293	9 (100%)	14 (88%)	0.391777	0	0	NA	0	0	NA	0	0	NA	0	0	NA
E2/E4	0	0	NA	0	0	NA	0	0	NA	0	0	NA	0	0	NA	1 (2%)	1 (2%)	NA	2 (3%)	1 (2%)	1	1 (4%)	0 (0%)	NA
E3/E4	0	0	NA	0	0	NA	0	0	NA	0	0	NA	8 (100%)	16 (84%)	0.883617	34 (85%)	40 (77%)	0.02868	41 (65%)	33 (61%)	0.5672	13 (57%)	21 (62%)	0.184
E4/E4	0	0	NA	0	0	NA	0	0	NA	0	0	NA	0 (0%)	3 (16%)	NA	5 (12%)	11 (21%)	1	20 (32%)	20 (37%)	0.7506	9 (39%)	13 (38%)	0.7216
Age	75.3 (6.44)	62.94 (7.16)	5.61736e-14	76.7 (4.9)	69.16 (8.24)	4.15743e-05	75.37 (8.01)	71.34 (7.35)	0.0629811	78.82 (5.55)	68.86 (9.78)	0.00354385	72.1 (6.43)	63.77 (8.67)	0.0130102	74.97 (6.16)	65.83 (7.92)	1.5048e-08	74.53 (6.88)	69.12 (6.41)	2.46953e-05	73.32 (8.7)	66.14 (7.59)	0.00248763
Female N (%)	29 (48%)	25 (58%)	0.43381	10 (42%)	19 (53%)	0.561865	13 (38%)	11 (52%)	0.454531	4 (44%)	10 (62%)	0.65035	4 (50%)	8 (42%)	1	12 (30%)	28 (54%)	0.0379755	30 (48%)	30 (56%)	0.502417	8 (35%)	19 (56%)	0.195367
MMSE	29.15 (0.73)	29.16 (0.72)	0.929935	29.21 (0.78)	28.81 (0.82)	0.0605451	25.59 (1.05)	25.33 (1.06)	0.390394	21.89 (1.05)	19 (3.01)	0.00231899	29.12 (0.64)	29.21 (0.79)	0.771628	28.73 (0.78)	28.98 (0.7)	0.108257	25.49 (1.11)	25.46 (1.16)	0.890346	21.91 (1.12)	19.65 (2.77)	9.35929e-05
Education years	16 (2.76)	12.7 (3.8)	6.81209e-06	16.08 (3.32)	12.36 (3.67)	0.000155981	15.62 (3.29)	9.76 (3.22)	6.90598e-08	16.22 (3.23)	9.88 (3.88)	0.00030847	15.5 (2)	12.47 (3.13)	0.00693795	16.02 (3.22)	12.1 (3.39)	1.86955e-07	15.25 (2.83)	11.39 (3.34)	1.20138e-09	15.3 (2.67)	9.59 (3.29)	2.0841e-09
APOE status was imputed for n=1 in EMIF-AD MBD control group, and n=1 in EMIF-AD MBD AD non-carrier MMSE 27-24 group (no allele info available). NA is not applicable. Cohort differences were testeed with two sample t-tests for continous variables and chi-square tests for dichotomous variables.
